# Supplementary material for: Taxonomic and functional characteristics of microbial communities and their correlation with physicochemical properties of four geothermal springs in Odisha, India
Source: Front Microbiol. 2015 Oct 26;6:1166. doi: 10.3389/fmicb.2015.01166 (PMC4620158; doi:10.3389/fmicb.2015.01166)
Supplement: Supplementary file 3 [file Table4.XLSX]

## Sheet: Legend
Supplementary Table 4. SEED functional profiles (at the level of categories, subsystems and functional genes) generated from the MEGAN5 classification.

## Sheet: SEED_categories
Proportion ofgenes related to different SEED categories identified across the four hot spring samples
Classification is based on MEGAN v5.3.0
Sample ID	HT-1	TP-2	TB-3	AT-4
Carbohydrates	14.1833	14.8463	14.8365	15.9662
Photosynthesis	0.0115594	0.224586	0.048724	0.0571356
Cofactors, Vitamins, Prosthetic Groups, Pigments	6.69287	5.62648	6.27322	6.41188
Virulence	9.10877	8.75887	7.72276	6.30396
Sulfur Metabolism	0.878511	0.945626	0.712589	0.590401
Stress Response	3.01699	3.29787	2.72246	3.33926
Protein Metabolism	7.73321	8.17967	9.94579	9.31945
RNA Metabolism	4.17293	4.31442	4.34253	4.37405
Motility and Chemotaxis	2.85516	2.58865	1.91242	2.18385
Secondary Metabolism	0.393018	0.579196	0.621232	0.577704
Amino Acids and Derivatives	8.3343	7.75414	8.41708	7.43398
Nitrogen Metabolism	1.91885	1.99764	1.68098	1.13636
Clustering-based subsystems	3.83771	3.98345	4.0441	3.89792
Fatty Acids, Lipids, and Isoprenoids	2.9014	2.77778	2.97826	2.66633
Nucleosides and Nucleotides	3.41001	2.99054	3.85529	3.26943
Cell Wall and Capsule	5.65253	5.29551	5.05512	5.82783
Metabolism of Aromatic Compounds	1.57207	1.54846	1.45563	1.30777
DNA Metabolism	6.31141	6.58392	7.11371	6.98959
Phages, Prophages, Transposable elements	0.115594	0.165485	0.176625	0.0761808
Membrane Transport	2.03445	2.17494	2.5032	3.07263
Respiration	7.27084	7.35225	6.91272	7.51016
Miscellaneous	1.21373	0.839243	0.998843	1.11097
Cell Division and Cell Cycle	2.99387	3.03783	2.39357	2.82504
Dormancy and Sporulation	0.0577968	0.106383	0.0913576	0.095226
Regulation and Cell signaling	1.83794	2.25768	1.52872	1.87278
Phosphorus Metabolism	1.37556	1.60757	1.62007	1.75851
Potassium metabolism	0.115594	0.165485	0.036543	0.0253936

## Sheet: SEED_subsystems
Proportion of genes related to different SEED subsystems identified across the four hot spring samples based on MEGAN5
Sample ID	HT-1	TP-2	TB-3	AT-4
Monosaccharides	2.13189	2.82805	2.23014	2.59843
Fermentation	0.972053	1.13122	1.29021	1.00408
Sugar alcohols	0.762178	0.938914	0.753109	0.681555
Organic acids	0.508119	0.576923	0.560453	0.565934
Central carbohydrate metabolism	3.5016	3.54072	3.89982	3.58425
CO2 fixation	1.32553	1.1086	1.16177	1.1623
Di- and oligosaccharides	1.46913	1.71946	1.46535	1.92296
One-carbon Metabolism	1.44703	1.13122	1.76309	2.06292
Polysaccharides	0.618579	0.588235	0.396988	0.425972
Aminosugars	0.629626	0.588235	0.437854	1.06493
Glycoside hydrolases	0.276152	0.192308	0.326931	0.255583
Lacto-N-Biose I and Galacto-N-Biose Metabolic Pathway	0.0110461	0	0	0
Light-harvesting complexes	0	0.0452489	0	0.0243413
Electron transport and photophosphorylation	0.0110461	0.180995	0.0467044	0.0365119
Quinone cofactors	0.629626	0.554299	0.490396	0.432057
Riboflavin, FMN, FAD	0.220921	0.192308	0.321093	0.383375
Folate and pterines	1.25925	1.1086	1.09755	1.18664
Lipoic acid	0.132553	0.0452489	0.221846	0.249498
Tetrapyrroles	1.92201	1.44796	1.442	1.50307
NAD and NADP	0.596487	0.622172	0.858194	0.851944
Coenzyme B	0.0110461	0.0113122	0	0.0243413
Thiamin biosynthesis	0.695902	0.463801	0.607157	0.626788
Coenzyme A	0.430796	0.542986	0.490396	0.352948
Pyridoxine	0.132553	0.192308	0.157627	0.176474
Coenzyme F420	0.0552303	0.0226244	0.0642186	0.0182559
Biotin	0.30929	0.180995	0.262712	0.340778
Regulation of virulence	0.0994146	0.271493	0.0817327	0.139962
Invasion and intracellular resistance	0.254059	0.248869	0.361959	0.255583
Resistance to antibiotics and toxic compounds	3.20336	3.38235	2.75556	2.00815
Adhesion	0.497073	0.452489	0.455368	0.529423
Type III, Type IV, Type VI, ESAT secretion systems	1.06042	1.09729	0.893222	0.937139
Quorum sensing and biofilm formation	0.0331382	0.0452489	0.0408664	0.0304266
Ton and Tol transport systems	2.40804	1.8552	1.67552	1.20489
Iron Scavenging Mechanisms	2.29758	1.54977	1.62298	0.991907
Pathogenicity islands	0.220921	0.237557	0.23936	0.255583
Detection	0.132553	0.113122	0.140113	0.0608532
Toxins and superantigens	0.0441842	0.10181	0.0583805	0.0608532
Streptococcus pyogenes Virulome	0	0.0226244	0.0350283	0.0121706
Pseudomonas quinolone signal PQS	0.0110461	0.0113122	0.00583805	0
Sulfate reduction-associated complexes	0.0883685	0.158371	0.110923	0.0851944
Organic sulfur assimilation	0.254059	0.316742	0.198494	0.164304
Thioredoxin-disulfide reductase	0.209875	0.20362	0.18098	0.188645
Galactosylceramide and Sulfatide metabolism	0.0773224	0.0904977	0.0758947	0.0547678
Sulfur oxidation	0.209875	0.135747	0.116761	0.0730238
Flavohaemoglobin	0	0.0113122	0.0116761	0
Oxidative stress	0.894731	1.16516	0.986631	0.937139
Osmotic stress	0.143599	0.20362	0.18098	0.152133
Universal stress protein family	0.0773224	0.0565611	0.0642186	0.0547678
Bacterial hemoglobins	0.0883685	0.10181	0.0583805	0.0486825
Heat shock dnaK gene cluster extended	1.1267	0.825792	0.89906	1.05885
Detoxification	0.0110461	0.0678733	0.0408664	0.0547678
SigmaB stress response regulation	0.430796	0.61086	0.23936	0.760665
Hfl operon	0.110461	0.113122	0.128437	0.121706
Acid stress	0	0	0	0.0121706
Protein biosynthesis	4.06495	4.14027	5.06159	5.00822
Protein degradation	1.48017	1.49321	2.15424	1.86819
Protein processing and modification	0.519165	0.746606	0.823165	0.742409
Secretion	0.0773224	0.135747	0.0992469	0.0486825
Protein folding	1.11565	1.21041	1.26686	1.10753
Selenoproteins	0.397658	0.486425	0.455368	0.48074
Transcription	2.18712	1.91176	1.91488	2.03858
RNA processing and modification	1.74528	2.11538	2.21846	2.09335
Group II intron-associated genes	0.0552303	0.10181	0.0291903	0.0608532
Flagellar motility in Prokaryota	2.13189	1.92308	1.37778	1.45439
Bacterial Chemotaxis	1.07147	0.859729	0.63051	0.876286
Social motility and nonflagellar swimming in bacteria	0	0.0113122	0	0
Biosynthesis of phenylpropanoids	0.0110461	0.0113122	0.0642186	0.0425972
Bacterial cytostatics, differentiation factors and antibiotics	0.0331382	0.10181	0.0525425	0.0730238
Plant Hormones	0.198829	0.226244	0.221846	0.164304
Biologically active compounds in metazoan cell defence and differentiation	0.0220921	0.0678733	0.0817327	0.109536
Lipid-derived mediators	0	0.0226244	0.0233522	0.0121706
Aromatic amino acids and derivatives.1	0.0220921	0.0791855	0.0583805	0.0547678
Plant Alkaloids	0.0883685	0.0339367	0.0934088	0.10345
Plant Octadecanoids	0	0.0113122	0	0
Branched-chain amino acids	1.63482	1.31222	1.69887	1.16838
Arginine; urea cycle, polyamines	1.24821	1.16516	1.18512	1.19272
Lysine, threonine, methionine, and cysteine.1	2.61792	2.62443	2.54539	2.34893
Proline and 4-hydroxyproline	0.209875	0.260181	0.175142	0.170389
Alanine, serine, and glycine	1.10461	0.81448	1.09172	1.02842
Aromatic amino acids and derivatives	0.408704	0.475113	0.566291	0.450313
Histidine Metabolism	0.497073	0.542986	0.601319	0.632873
L-2-amino-thiazoline-4-carboxylic acid-Lcysteine conversion	0	0	0.00583805	0
Glutamine, glutamate, aspartate, asparagine; ammonia assimilation	0.243013	0.237557	0.21017	0.133877
Nitric oxide synthase	0.0331382	0.0791855	0.0642186	0
Ammonia assimilation	1.01624	0.859729	0.864032	0.687641
Nitrosative stress	0.0552303	0.113122	0.0467044	0.0608532
Denitrification	0.231967	0.124434	0.116761	0.0730238
Nitrogen fixation	0.187783	0.192308	0.0992469	0.0851944
Amidase clustered with urea and nitrile hydratase functions	0	0.0113122	0	0
Dissimilatory nitrite reductase	0.0441842	0	0.0175142	0
Cyanate hydrolysis	0	0.0226244	0.00583805	0
Nitrate and nitrite ammonification	0.298244	0.50905	0.385311	0.182559
Allantoin Utilization	0	0	0.0116761	0
Lysine, threonine, methionine, and cysteine	0.0331382	0.0226244	0.00583805	0.0365119
NusA-TFII Cluster	0.276152	0.316742	0.291903	0.334692
LMPTP YfkJ cluster	0.0552303	0.113122	0.0291903	0.0121706
Putative sulfate assimilation cluster	0	0	0.0116761	0
Putative hemin transporter	0.0110461	0.0452489	0.0233522	0.0365119
Clustering-based subsystems.1	0.243013	0.226244	0.192656	0.219071
Bacterial Cell Division	1.66796	1.5724	1.77477	1.75866
Catabolism of an unknown compound	0.0220921	0.0113122	0.0116761	0
Conserved gene cluster associated with Met-tRNA formyltransferase	0.817409	1.06335	0.875708	0.803262
Type III secretion system, extended	0.0220921	0	0	0
Bacterial RNA-metabolizing Zn-dependent hydrolases	0.574395	0.656109	0.612996	0.711982
proteosome related	0.110461	0.10181	0.233522	0.0365119
LMPTP YwlE cluster	0.143599	0.0904977	0.227684	0.19473
Carbohydrates.1	0.0220921	0.0113122	0.0175142	0.0425972
CBSS-261594.1.peg.2640	0.0220921	0.0452489	0.0175142	0.0730238
Fatty acids	1.08251	1.07466	1.0275	0.888456
Phospholipids	0.927869	0.565611	0.910736	0.851944
Isoprenoids	0.662764	0.950226	0.846518	0.803262
Triacylglycerols	0.0110461	0.0339367	0.0116761	0.0121706
Polyhydroxybutyrate metabolism	0.132553	0.0791855	0.105085	0.0486825
Purines	1.76737	1.42534	1.90904	1.5335
Adenosyl nucleosidases	0.0220921	0.0339367	0.0758947	0.0791091
Pyrimidines	0.0552303	0.0904977	0.0700566	0.0304266
AMP to 3-phosphoglycerate	0	0	0.00583805	0
De Novo Pyrimidine Synthesis	0.474981	0.463801	0.519587	0.419887
Hydantoin metabolism	0.132553	0.113122	0.216008	0.206901
Ribonucleotide_reduction	0.375566	0.316742	0.338607	0.340778
Detoxification.1	0.143599	0.147059	0.0758947	0.170389
Purine Utilization	0.287198	0.271493	0.484558	0.352948
Capsular and extracellular polysacchrides	1.04938	1.32353	1.01582	1.284
Peptidoglycan Biosynthesis	1.46913	1.23303	1.40697	1.51524
Gram-Positive cell wall components	0.165691	0.135747	0.216008	0.292095
Gram-Negative cell wall components	1.24821	1.15385	0.823165	0.906712
Cell wall of Mycobacteria	1.1267	0.837104	0.939926	1.22315
UDP-N-acetylmuramate from Fructose-6-phosphate Biosynthesis	0.132553	0.271493	0.251036	0.279925
YjeE	0.265105	0.180995	0.26855	0.170389
Peripheral pathways for catabolism of aromatic compounds	0.67381	0.791855	0.735595	0.620702
Metabolism of central aromatic intermediates	0.585441	0.542986	0.490396	0.541593
Benzoate transport and degradation cluster	0.121507	0.135747	0.122599	0.0608532
carbazol degradation cluster	0	0.0452489	0.0175142	0
Anaerobic degradation of aromatic compounds	0.0773224	0	0.00583805	0.00608532
Cresol degradation	0	0	0.0116761	0.0121706
Gentisare degradation	0.0441842	0.0339367	0.0817327	0.0486825
Salicylate and gentisate catabolism	0.0883685	0.0452489	0.0934088	0.0486825
Aromatic Amin Catabolism	0.0220921	0.0339367	0.0175142	0.0121706
DNA repair	2.8057	3.12217	3.56705	3.27999
DNA replication	2.44118	2.44344	2.49285	2.16637
Restriction-Modification System	0.408704	0.486425	0.467044	0.821518
DNA structural proteins, bacterial	0.132553	0.0452489	0.110923	0.0791091
YcfH	0.0662764	0.0791855	0.0817327	0.10345
CRISPRs	0.375566	0.452489	0.356121	0.48074
DNA recombination	0.176737	0.147059	0.256874	0.206901
Bacteriophage structural proteins	0	0	0.00583805	0
Listeria phi-A118-like prophages	0.0110461	0	0	0
Staphylococcal phi-Mu50B-like prophages	0.0773224	0.124434	0.122599	0.0730238
Tn552	0.0220921	0.0339367	0.0408664	0
Transport of Nickel and Cobalt	0.143599	0.113122	0.140113	0.188645
Uni- Sym- and Antiporters	0.231967	0.147059	0.192656	0.395546
ABC transporters	0.651718	0.71267	0.969117	0.96148
Transport of Molybdenum	0	0.0226244	0.00583805	0
Sugar Phosphotransferase Systems, PTS	0.0220921	0.113122	0.0758947	0.133877
Potassium homeostasis	0.474981	0.520362	0.47872	0.456399
Transport of Manganese	0.110461	0.0791855	0.0992469	0.176474
Agrobacterium opine transport	0	0.0113122	0.00583805	0.0182559
ECF class transporters	0.231967	0.192308	0.274388	0.57202
Transport of Zinc	0.198829	0.271493	0.256874	0.188645
Electron donating reactions	3.36905	3.3371	3.24012	3.6877
Electron accepting reactions	1.25925	1.25566	1.10339	1.53958
Carbon monoxide dehydrogenase maturation factors	0.0883685	0.113122	0.0467044	0.0791091
Biogenesis of c-type cytochromes	0.497073	0.565611	0.402826	0.310351
Cytochrome B6-F complex	0.0220921	0.0678733	0	0
ATP synthases	0.629626	0.50905	0.554615	0.614617
Biogenesis of cytochrome c oxidases	0.154645	0.124434	0.0583805	0.0182559
Carbon monoxide induced hydrogenase	0.187783	0.147059	0.513749	0.492911
Soluble cytochromes and functionally related electron carriers	0.474981	0.554299	0.601319	0.657214
Tetrathionate respiration	0.110461	0.0452489	0.0116761	0.0182559
Formate hydrogenase	0.397658	0.520362	0.402826	0.352948
Sodium Ion-Coupled Energetics	0.0110461	0.0565611	0.0525425	0.0304266
pH adaptation potassium efflux system	0	0	0.00583805	0.0243413
Biogenesis of cbb3-type cytochrome c oxidases	0.0883685	0.124434	0.0350283	0
YbbK	0.198829	0.147059	0.233522	0.267754
YaaA	0.0220921	0.0113122	0	0
Luciferases	0	0.0113122	0	0.00608532
ZZ gjo need homes	0.850547	0.588235	0.653862	0.724153
Muconate lactonizing enzyme family	0.0662764	0.0113122	0.0467044	0.0425972
Archease	0.0220921	0.0339367	0.0233522	0.0243413
Control of Macromolecuar Synthesis	0.795316	0.803167	0.6597	0.559849
Cell cycle in Prokaryota	2.02143	2.04751	1.59379	2.11769
YgjD and YeaZ	0.0883685	0.124434	0.145951	0.139962
Spore germination	0.0110461	0.0339367	0.00583805	0.0121706
Spore Coat	0.0110461	0	0.00583805	0
Sporulation gene orphans	0.0331382	0.0565611	0.0700566	0.0791091
Bacillus biofilm matrix protein component TasA and homologs	0	0.0113122	0.00583805	0
Proteolytic pathway	0.0220921	0.0113122	0.0233522	0.121706
Programmed Cell Death and Toxin-antitoxin Systems	0.0883685	0.0565611	0.0934088	0.109536
CytR regulation	0.0220921	0.0339367	0.0233522	0.0730238
Antibacterial peptides	0.0110461	0	0.0175142	0.0425972
Sex pheromones in Enterococcus faecalis and other Firmicutes	0.176737	0.192308	0.233522	0.115621
Oxygen and light sensor PpaA-PpsR	0.0110461	0.0904977	0.0700566	0.0547678
Orphan regulatory proteins	0.154645	0.214932	0.175142	0.170389
Two-component regulatory systems in Campylobacter	0.452889	0.61086	0.192656	0.425972
cAMP signaling in bacteria	0.541257	0.803167	0.44953	0.57202
DNA-binding regulatory proteins, strays	0.0773224	0.0791855	0.0642186	0
Stringent Response, (p)ppGpp metabolism	0.198829	0.0678733	0.122599	0.109536
Alkylphosphonate utilization	0.0331382	0.0226244	0.0291903	0.0365119
Phosphonate metabolism	0	0.0226244	0.00583805	0.00608532
High affinity phosphate transporter and control of PHO regulon	0.563349	0.678733	0.729757	1.02842
Phosphate metabolism	1.28134	1.49321	1.51789	1.64304
Glutathione-regulated potassium-efflux system and associated functions	0.110461	0.158371	0.0350283	0.0243413

## Sheet: SEED_functional gene
Absolute count of unique genes based on SEED classification on MEGAN5
Sample ID	HT-1	TP-2	TB-3	AT-4
Propionate--CoA ligase (EC 6.2.1.17)	1	2	1	1
2-methylcitrate dehydratase (EC 4.2.1.79)	2	1	3	0
Methylisocitrate lyase (EC 4.1.3.30)	5	1	0	0
Propionate catabolism operon regulatory protein PrpR	0	0	1	1
Propionate catabolism operon transcriptional regulator of GntR family [predicted]	0	0	1	0
L-lactate dehydrogenase (EC 1.1.2.3)	0	0	4	0
Predicted D-lactate dehydrogenase, Fe-S protein, FAD/FMN-containing	2	2	1	0
Predicted L-lactate dehydrogenase, Fe-S oxidoreductase subunit YkgE	4	4	6	6
Predicted L-lactate dehydrogenase, Iron-sulfur cluster-binding subunit YkgF	3	4	4	0
Predicted L-lactate dehydrogenase, hypothetical protein subunit YkgG	1	2	2	0
Predicted L-lactate dehydrogenase, hypothetical protein subunit SO1518	1	0	0	0
L-lactate permease	2	1	5	9
Lactate-responsive regulator LldR in Firmicutes, GntR family	0	1	0	1
Predicted Lactate-responsive regulator, IclR family	0	0	1	0
Aconitate hydratase (EC 4.2.1.3)	14	9	12	7
Aconitate hydratase 2 (EC 4.2.1.3)	0	1	0	0
Malonate decarboxylase beta subunit	0	0	1	0
2-methylaconitate racemase	1	0	0	0
Butyryl-CoA dehydrogenase (EC 1.3.99.2)	4	5	22	19
Branched-chain acyl-CoA dehydrogenase (EC 1.3.99.12)	0	1	1	0
Enoyl-CoA hydratase [valine degradation] (EC 4.2.1.17)	0	3	3	0
3-hydroxyisobutyryl-CoA hydrolase (EC 3.1.2.4)	0	0	1	0
3-hydroxyisobutyrate dehydrogenase (EC 1.1.1.31)	0	1	1	0
Methylmalonate-semialdehyde dehydrogenase (EC 1.2.1.27)	1	1	4	9
3-ketoacyl-CoA thiolase [isoleucine degradation] (EC 2.3.1.16)	0	0	2	1
Propionyl-CoA carboxylase biotin-containing subunit (EC 6.4.1.3)	0	3	2	0
Propionyl-CoA carboxylase carboxyl transferase subunit (EC 6.4.1.3)	4	1	4	9
Methylmalonyl-CoA epimerase (EC 5.1.99.1)	2	2	2	14
Methylmalonyl-CoA mutase (EC 5.4.99.2)	13	21	40	43
Methylmalonyl-CoA decarboxylase, alpha chain (EC 4.1.1.41)	3	3	7	5
Methylmalonyl-CoA decarboxylase, beta chain (EC 4.1.1.41)	1	1	3	0
B12 binding domain of Methylmalonyl-CoA mutase (EC 5.4.99.2)	1	1	8	4
Ribokinase (EC 2.7.1.15)	6	7	10	19
Ribose ABC transport system, ATP-binding protein RbsA (TC 3.A.1.2.1)	5	3	8	6
Ribose ABC transport system, periplasmic ribose-binding protein RbsB (TC 3.A.1.2.1)	2	2	5	1
Ribose ABC transport system, permease protein RbsC (TC 3.A.1.2.1)	8	7	7	23
Ribose ABC transport system, high affinity permease RbsD (TC 3.A.1.2.1)	0	0	0	1
Ribose operon repressor	8	2	8	6
Ribose 5-phosphate isomerase A (EC 5.3.1.6)	1	1	5	3
Ribose 5-phosphate isomerase B (EC 5.3.1.6)	4	4	3	8
Predicted nucleoside ABC transporter, permease 1 component	1	0	1	0
Predicted nucleoside ABC transporter, permease 2 component	0	2	0	0
Predicted nucleoside ABC transporter, ATP-binding component	0	0	1	0
Predicted nucleoside ABC transporter, substrate-binding component	0	0	2	0
Fucose permease	0	2	1	0
Alpha-L-fucosidase (EC 3.2.1.51)	3	1	4	1
L-fuco-beta-pyranose dehydrogenase	1	0	0	0
2-keto-3-deoxy-L-fuconate dehydrogenase	0	2	2	0
2,4-diketo-3-deoxy-L-fuconate hydrolase	0	1	0	0
Xylose isomerase (EC 5.3.1.5)	1	4	2	6
Xylulose kinase (EC 2.7.1.17)	5	16	8	21
Xylose ABC transporter, periplasmic xylose-binding protein XylF	0	2	0	0
D-xylose transport ATP-binding protein XylG	1	1	1	3
Xylose ABC transporter, permease protein XylH	0	0	0	1
Novel Xylose regulator from LacI family	0	1	4	12
Alpha-xylosidase (EC 3.2.1.-)	1	3	8	2
Beta-xylosidase (EC 3.2.1.37)	4	8	24	39
Possible alpha-xyloside ABC transporter, permease component	2	0	1	3
Endo-1,4-beta-xylanase A precursor (EC 3.2.1.8)	4	7	9	6
D-xylose 1-dehydrogenase (EC 1.1.1.175)	0	0	1	0
2-ketoglutaric semialdehyde dehydrogenase (EC 1.2.1.26)	1	0	0	0
PTS system, galactitol-specific IIA component (EC 2.7.1.69)	1	0	0	0
Galactitol-1-phosphate 5-dehydrogenase (EC 1.1.1.251)	1	0	0	0
6-phosphofructokinase (EC 2.7.1.11)	6	10	15	26
Sensor histidine protein kinase UhpB, glucose-6-phosphate specific (EC 2.7.13.3)	1	5	3	6
Transcriptional regulatory protein UhpA	2	3	2	1
2-Keto-D-gluconate dehydrogenase (EC 1.1.99.4), membrane-bound, flavoprotein	1	0	0	0
2-dehydro-3-deoxygluconate kinase (EC 2.7.1.45)	1	2	8	4
5-keto-D-gluconate 5-reductase (EC 1.1.1.69)	0	1	1	1
Gluconate 2-dehydrogenase (EC 1.1.99.3), membrane-bound, gamma subunit	0	1	0	0
Gluconokinase (EC 2.7.1.12)	0	3	3	3
Glucose 1-dehydrogenase (EC 1.1.1.47)	2	2	3	2
Glucose dehydrogenase (EC 1.1.99.10), membrane-bound, flavoprotein	0	0	0	1
Predicted gluconate TRAP family transporter, DctM subunit	0	0	1	0
L-rhamnose isomerase (EC 5.3.1.14)	1	3	0	3
Rhamnulokinase (EC 2.7.1.5)	3	1	3	1
Rhamnulose-1-phosphate aldolase (EC 4.1.2.19)	1	0	2	3
Lactaldehyde dehydrogenase involved in fucose or rhamnose utilization (EC 1.2.1.22)	0	1	0	0
L-rhamnose mutarotase	0	1	0	0
L-rhamnose-proton symporter	1	1	0	0
Predicted L-rhamnose permease RhaY	0	0	1	0
Predicted L-rhamnose ABC transporter, substrate-binding component	2	1	1	4
Predicted L-rhamnose ABC transporter, transmembrane component 1	1	2	0	1
Predicted L-rhamnose ABC transporter, transmembrane component 2	2	1	0	1
Predicted L-rhamnose ABC transporter, ATP-binding component	3	3	1	3
Transcriptional regulator of rhamnose utilization, DeoR family	0	0	0	2
Rhamnogalacturonides degradation protein RhiN	0	3	0	0
Alfa-L-rhamnosidase (EC 3.2.1.40)	0	2	4	1
Predicted rhamnogalacturonan lyase in rhamnose utilization cluster	0	0	0	1
rhamnogalacturonan acetylesterase	0	1	0	1
Predicted rhamnose oligosaccharide ABC transport system, permease component	3	2	2	5
Predicted rhamnose oligosaccharide ABC transport system, permease component 2	3	2	5	8
Predicted rhamnose oligosaccharide ABC transport system, substrate-binding component	1	0	1	0
Pedicted L-rhamnose permease, NCS1 Family	0	2	2	0
Aldehyde dehydrogenase A (EC 1.2.1.22)	0	0	1	0
L-fucose isomerase (EC 5.3.1.25)	2	1	3	2
L-fuculokinase (EC 2.7.1.51)	0	1	0	2
L-fuculose phosphate aldolase (EC 4.1.2.17)	0	1	1	5
Possible fucose ABC transporter, substrate-binding component	1	0	0	0
PTS system, glucitol/sorbitol-specific IIC component (EC 2.7.1.69)	1	0	1	1
PTS system, glucitol/sorbitol-specific IIB component and second of two IIC components (EC 2.7.1.69)	0	1	0	1
Sorbitol-6-phosphate 2-dehydrogenase (EC 1.1.1.140)	2	2	0	1
Glucitol operon activator protein	1	1	1	2
Sorbitol operon transcription regulator	0	3	2	0
Glucitol operon repressor	0	0	0	1
Glucitol operon GutQ protein	0	0	0	1
Hexuronate utilization operon transcriptional repressor ExuR	0	0	1	0
Hexuronate transporter	0	3	2	1
Altronate hydrolase (EC 4.2.1.7)	0	3	5	0
Altronate oxidoreductase (EC 1.1.1.58)	1	0	0	0
Uronate isomerase (EC 5.3.1.12)	0	3	2	2
D-mannonate oxidoreductase (EC 1.1.1.57)	0	2	0	1
Mannonate dehydratase (EC 4.2.1.8)	2	0	1	0
Pectin degradation protein KdgF	2	0	2	1
D-galactarate dehydratase (EC 4.2.1.42)	1	0	0	0
5-dehydro-4-deoxyglucarate dehydratase (EC 4.2.1.41)	0	0	1	0
Alpha-glucosidase (EC 3.2.1.20)	8	5	5	4
Thymidine phosphorylase (EC 2.4.2.4)	0	2	1	1
Pyrimidine-nucleoside phosphorylase (EC 2.4.2.2)	4	4	6	10
Purine nucleoside phosphorylase (EC 2.4.2.1)	2	3	13	13
Phosphopentomutase (EC 5.4.2.7)	3	3	7	3
Deoxyribose-phosphate aldolase (EC 4.1.2.4)	4	3	7	12
Nucleoside permease NupC	1	2	1	1
Putative deoxyribonuclease YjjV	1	1	0	0
Putative deoxyribose-specific ABC transporter, permease protein	4	4	6	13
Putative deoxyribose-specific ABC transporter, ATP-binding protein	9	5	9	10
2-ketogluconate 6-phosphate reductase (EC 1.1.1.43)	0	1	0	0
D-galactonate transporter	0	0	2	0
Galactonate dehydratase (EC 4.2.1.6)	1	1	1	0
2-dehydro-3-deoxygalactonokinase (EC 2.7.1.58)	1	0	1	0
D-galactonate regulator, IclR family	0	0	0	1
Mannose-6-phosphate isomerase (EC 5.3.1.8)	2	1	1	2
PTS system, mannose-specific IIB component (EC 2.7.1.69)	0	0	0	3
PTS system, mannose-specific IIA component (EC 2.7.1.69)	0	1	1	0
PTS system, mannose-specific IIC component (EC 2.7.1.69)	0	0	1	4
Phosphomannomutase (EC 5.4.2.8)	4	9	23	18
Mannose-1-phosphate guanylyltransferase (GDP) (EC 2.7.7.22)	2	7	10	16
Mannose-1-phosphate guanylyltransferase (EC 2.7.7.13 )	0	2	4	1
GDP-mannose mannosyl hydrolase (EC 3.6.1.-)	0	1	0	0
Beta-mannosidase (EC 3.2.1.25)	6	2	8	7
Transcriptional regulator of mannoside utilization, variant 2, LacI family	0	1	0	0
Alpha-1,2-mannosidase	0	4	9	1
Endo-alpha-mannosidase	0	1	3	2
Predicted sodium-dependent mannose transporter	0	1	0	0
Hexokinase (EC 2.7.1.1)	0	0	3	0
Alpha-mannosidase (EC 3.2.1.24)	7	7	26	12
PTS system, fructose-specific IIA component (EC 2.7.1.69)	1	2	0	4
1-phosphofructokinase (EC 2.7.1.56)	2	2	7	4
Fructose ABC transporter, ATP-binding component FrcA	0	1	1	0
Fructose ABC transporter, substrate-binding component FrcB	0	1	0	0
Fructose ABC transporter, permease component FrcC	0	0	1	0
Fructokinase (EC 2.7.1.4)	0	0	5	7
Transcriptional repressor of the fructose operon, DeoR family	1	0	1	4
Transaldolase (EC 2.2.1.2)	9	8	15	10
Phosphoenolpyruvate-protein phosphotransferase of PTS system (EC 2.7.3.9)	2	10	9	19
L-ribulose-5-phosphate 4-epimerase (EC 5.1.3.4)	1	2	2	1
L-xylulose 5-phosphate 3-epimerase (EC 5.1.3.-) homolog	0	0	1	0
Ribulokinase (EC 2.7.1.16)	1	2	4	1
L-arabinose isomerase (EC 5.3.1.4)	0	2	5	1
L-arabinose transport system permease protein (TC 3.A.1.2.2)	2	0	0	2
Arabinose-proton symporter	0	0	1	0
Alpha-N-arabinofuranosidase (EC 3.2.1.55)	7	3	5	4
Arabinan endo-1,5-alpha-L-arabinosidase (EC 3.2.1.99)	0	0	0	1
Alpha-N-arabinofuranosidase 2 (EC 3.2.1.55)	2	1	1	0
L-arabinose-specific 1-epimerase (mutarotase)	1	0	2	1
Hypothetical glycoside hydrolase, family 43, similar to arabinosidase	2	0	0	0
Alpha-L-arabinofuranosidase II precursor (EC 3.2.1.55)	5	0	1	3
alternative Ribulokinase (EC 2.7.1.16)	0	0	3	0
Glycerate kinase (EC 2.7.1.31)	1	1	0	1
2-hydroxy-3-oxopropionate reductase (EC 1.1.1.60)	4	8	1	3
2-dehydro-3-deoxyglucarate aldolase (EC 4.1.2.20)	1	1	0	0
Glucarate dehydratase (EC 4.2.1.40)	0	1	2	5
D-glycerate 2-kinase (EC 2.7.1.-)	0	2	1	0
D-ribulokinase (EC 2.7.1.47)	1	0	1	0
Xylitol dehydrogenase (EC 1.1.1.9)	2	1	0	1
Various polyols ABC transporter, permease component 1	0	0	0	1
Various polyols ABC transporter, permease component 2	1	0	0	0
Various polyols ABC transporter, ATP-binding component	0	1	0	0
Sorbitol dehydrogenase (EC 1.1.1.14)	10	11	25	8
6-phosphofructokinase (EC 2.7.1.11), PF08013 family	0	0	1	0
Ribulose-phosphate 3-epimerase (EC 5.1.3.1)	2	6	14	13
Cob(I)alamin adenosyltransferase PduO (EC 2.5.1.17)	5	3	0	2
Glycerol dehydratase small subunit (EC 4.2.1.30)	1	0	0	0
Glycerol uptake facilitator protein	0	0	0	1
CoA-acylating propionaldehyde dehydrogenase	1	0	0	0
Cob(III)alamin reductase	0	1	6	0
Propanediol utilization polyhedral body protein PduT	0	2	0	0
Phosphate acetyltransferase (EC 2.3.1.8)	2	3	4	3
Acetaldehyde dehydrogenase, ethanolamine utilization cluster	1	3	3	0
Acetate kinase (EC 2.7.2.1)	3	3	7	1
Ethanolamine sensory transduction histidine kinase	0	0	1	0
Ethanolamine utilization polyhedral-body-like protein EutM	1	0	0	0
Ethanolamine utilization protein EutA	1	0	0	0
Ethanolamine utilization protein similar to PduA/PduJ	0	0	2	0
Ethanolamine utilization protein similar to PduL	1	0	2	0
Ethanolamine utilization protein similar to PduT	0	0	1	0
PTS system, mannitol-specific IIC component (EC 2.7.1.69)	0	1	0	0
Mannitol-1-phosphate 5-dehydrogenase (EC 1.1.1.17)	0	1	0	0
Mannitol operon activator, BglG family	1	0	0	0
Phosphocarrier protein of PTS system	0	0	4	3
HPr kinase/phosphorylase (EC 2.7.1.-) (EC 2.7.4.-)	0	1	0	3
Fe-containing alcohol dehydrogenase	0	0	1	0
Inositol transport system ATP-binding protein	1	2	3	6
Inositol transport system sugar-binding protein	0	1	0	0
Inosose dehydratase (EC 4.2.1.44)	0	0	1	2
Inosose isomerase (EC 5.3.99.-)	0	0	0	1
Methylmalonate-semialdehyde dehydrogenase [inositol] (EC 1.2.1.27)	1	1	4	3
Myo-inositol 2-dehydrogenase (EC 1.1.1.18)	17	19	24	11
Predicted transcriptional regulator of the myo-inositol catabolic operon	2	0	0	0
uncharacterized domain	2	1	0	0
Inositol-1-phosphate synthase (EC 5.5.1.4)	5	3	9	24
Inositol-1-monophosphatase (EC 3.1.3.25)	0	4	1	2
CTP:Inositol-1-phosphate cytidylyltransferase (2.7.7.-)	0	0	1	0
Glycerol-3-phosphate transporter	0	1	0	1
Glycerol kinase (EC 2.7.1.30)	6	4	11	22
Glycerol-3-phosphate dehydrogenase [NAD(P)+] (EC 1.1.1.94)	8	4	10	5
Glycerol-3-phosphate regulon repressor, DeoR family	0	0	0	2
Glycerophosphoryl diester phosphodiesterase (EC 3.1.4.46)	3	12	5	9
Glycerol-3-phosphate ABC transporter, periplasmic glycerol-3-phosphate-binding protein (TC 3.A.1.1.3)	5	3	11	12
Probable glycerol transport protein	1	1	4	9
Erythritol kinase EryA (EC 2.7.1.27)	0	1	0	0
Possible D-erythrulose 4-phosphate dehydrogenase EryC (EC 1.1.1.-)	1	0	1	0
Melibiose operon regulatory protein	2	0	0	0
Alpha-galactosidase (EC 3.2.1.22)	7	7	9	8
Melibiose carrier protein, Na+/melibiose symporter	0	1	0	0
1,4-alpha-glucan (glycogen) branching enzyme, GH-13-type (EC 2.4.1.18)	4	6	7	6
Alpha,alpha-trehalose-phosphate synthase [UDP-forming] (EC 2.4.1.15)	0	0	1	0
Alpha-amylase (EC 3.2.1.1)	3	4	7	22
Glucoamylase (EC 3.2.1.3)	3	4	6	3
Glycogen debranching enzyme (EC 3.2.1.-)	6	2	3	3
Malto-oligosyltrehalose synthase (EC 5.4.99.15)	2	4	3	5
Malto-oligosyltrehalose trehalohydrolase (EC 3.2.1.141)	1	2	0	1
Trehalose synthase (EC 5.4.99.16)	0	6	1	11
Beta-galactosidase (EC 3.2.1.23)	7	11	37	30
Transcriptional repressor of the lac operon	1	1	0	0
Aldose 1-epimerase (EC 5.1.3.3)	0	0	1	0
Galactokinase (EC 2.7.1.6)	4	6	9	9
Galactose-1-phosphate uridylyltransferase (EC 2.7.7.10)	6	5	16	13
UDP-glucose 4-epimerase (EC 5.1.3.2)	36	28	66	78
Galactose/methyl galactoside ABC transport system, ATP-binding protein MglA (EC 3.6.3.17)	0	1	0	1
Trehalose-6-phosphate hydrolase (EC 3.2.1.93)	0	0	1	1
Trehalase (EC 3.2.1.28)	0	3	0	0
Beta-phosphoglucomutase (EC 5.4.2.6)	1	1	1	6
Maltoporin (maltose/maltodextrin high-affinity receptor, phage lambda receptor protein)	0	1	0	0
Putative cytoplasmic protein clustered with trehalase	0	1	0	0
PTS system, glucose-specific IIA component (EC 2.7.1.69)	0	0	1	0
Sucrose phosphorylase (EC 2.4.1.7)	1	1	0	2
Endo-beta-1,3-1,4 glucanase (Licheninase) (EC 3.2.1.73)	0	1	0	0
6-phospho-beta-glucosidase (EC 3.2.1.86)	2	1	1	7
Beta-glucosidase (EC 3.2.1.21)	10	8	15	25
Cellobiose phosphotransferase system YdjC-like protein	1	3	4	2
Periplasmic beta-glucosidase (EC 3.2.1.21)	5	1	3	9
Beta-glucanase precursor (EC 3.2.1.73)	1	1	2	2
Galactoside O-acetyltransferase (EC 2.3.1.18)	1	1	4	1
Evolved beta-D-galactosidase, alpha subunit	0	0	0	1
Multiple sugar ABC transporter, substrate-binding protein	2	1	2	4
Multiple sugar ABC transporter, membrane-spanning permease protein MsmF	1	3	5	8
Multiple sugar ABC transporter, membrane-spanning permease protein MsmG	1	0	1	1
Multiple sugar ABC transporter, ATP-binding protein	5	5	9	7
Sucrose-6-phosphate hydrolase (EC 3.2.1.26)	3	2	0	0
Sucrose operon repressor ScrR, LacI family	0	0	1	0
Maltose/maltodextrin ABC transporter, substrate binding periplasmic protein MalE	9	2	7	16
Maltose/maltodextrin ABC transporter, permease protein MalF	5	6	7	13
Maltose/maltodextrin ABC transporter, permease protein MalG	6	5	8	14
Maltose/maltodextrin transport ATP-binding protein MalK (EC 3.6.3.19)	0	2	2	2
Glycogen phosphorylase (EC 2.4.1.1)	13	18	11	17
4-alpha-glucanotransferase (amylomaltase) (EC 2.4.1.25)	9	7	10	7
Transcriptional activator of maltose regulon, MalT	4	7	18	17
Maltose operon transcriptional repressor MalR, LacI family	3	1	5	8
Maltodextrin glucosidase (EC 3.2.1.20)	4	12	8	13
Oligo-1,6-glucosidase (EC 3.2.1.10)	1	1	0	0
Neopullulanase (EC 3.2.1.135)	9	7	15	25
Periplasmic alpha-amylase (EC 3.2.1.1)	0	1	0	0
Zinc-type alcohol dehydrogenase YcjQ	0	0	1	0
Putative sucrose phosphorylase (EC 2.4.1.7)	0	1	0	1
Inner membrane ABC transporter permease protein YcjP	0	1	0	0
Maltose regulon regulatory protein MalI (repressor for malXY)	0	1	0	0
Mlc, transcriptional repressor of MalT (the transcriptional activator of maltose regulon) and manXYZ operon	2	0	6	5
Maltose O-acetyltransferase (EC 2.3.1.79)	0	1	0	4
Cytoplasmic alpha-amylase (EC 3.2.1.1)	0	2	1	0
Transcriptional regulator of maltose utilization, LacI family	0	1	0	0
Predicted maltose transporter MalT	1	0	1	0
NTD biosynthesis operon putative oxidoreductase NtdC (EC 1.-.-.-)	2	1	0	6
N-acetylglucosamine-6-phosphate deacetylase (EC 3.5.1.25)	2	1	7	1
Glucosamine-6-phosphate deaminase (EC 3.5.99.6)	0	1	1	1
Glucosamine-6-phosphate deaminase [isomerizing], alternative (EC 3.5.99.6)	2	1	4	3
N-Acetyl-D-glucosamine ABC transport system, sugar-binding protein	9	14	15	57
N-Acetyl-D-glucosamine ABC transport system, permease protein 1	8	4	5	16
N-Acetyl-D-glucosamine ABC transport system, permease protein 2	9	6	4	41
Predicted transcriptional regulator of N-Acetylglucosamine utilization, GntR family	4	3	3	8
Beta-hexosaminidase (EC 3.2.1.52)	9	12	13	23
Chitodextrinase precursor (EC 3.2.1.14)	1	0	0	0
Chitinase (EC 3.2.1.14)	6	4	17	8
Chitin binding protein	0	0	0	2
Phosphatase NagD predicted to act in N-acetylglucosamine utilization subsystem	0	1	0	1
N-acetylglucosamine related transporter, NagX	1	0	2	1
Predicted N-acetyl-glucosamine kinase 2, ROK family (EC 2.7.1.59)	1	1	0	0
PTS system, N-acetylgalactosamine-specific IIB component (EC 2.7.1.69)	0	0	1	0
PTS system, N-acetylgalactosamine- and galactosamine-specific IIA component (EC 2.7.1.69)	0	0	0	1
Transcriptional repressor of aga operon	1	0	0	4
GALNS arylsulfatase regulator (Fe-S oxidoreductase)	0	1	0	0
Pyruvate dehydrogenase E1 component (EC 1.2.4.1)	5	1	13	4
Pyruvate dehydrogenase E1 component alpha subunit (EC 1.2.4.1)	5	4	1	0
Pyruvate dehydrogenase E1 component beta subunit (EC 1.2.4.1)	3	5	7	3
Dihydrolipoamide acetyltransferase component of pyruvate dehydrogenase complex (EC 2.3.1.12)	8	3	3	5
Dihydrolipoamide dehydrogenase of pyruvate dehydrogenase complex (EC 1.8.1.4)	2	2	4	1
Acylphosphate phosphohydrolase (EC 3.6.1.7), putative	4	1	5	3
Acetate permease ActP (cation/acetate symporter)	1	3	3	1
Putative membrane protein, clustering with ActP	0	0	1	0
Acetyl-coenzyme A synthetase (EC 6.2.1.1)	16	16	49	41
Acetyl-CoA synthetase (ADP-forming) alpha chain (EC 6.2.1.13)	1	3	12	3
Acetyl-CoA synthetase (ADP-forming) beta chain (EC 6.2.1.13)	1	0	5	3
Acetyl-CoA synthetase (ADP-forming) alpha and beta chains, putative	7	10	45	61
Protein acetyltransferase	0	4	0	1
NAD-dependent protein deacetylase of SIR2 family	4	7	10	18
NAD-independent protein deacetylase AcuC	0	0	0	4
Aldehyde dehydrogenase (EC 1.2.1.3)	11	8	23	3
Lactate 2-monooxygenase (EC 1.13.12.4)	0	0	2	0
Aldehyde dehydrogenase B (EC 1.2.1.22)	3	3	15	6
Hydroxyacylglutathione hydrolase (EC 3.1.2.6)	1	1	0	0
Lactoylglutathione lyase (EC 4.4.1.5)	1	1	0	0
Methylglyoxal synthase (EC 4.2.3.3)	0	2	0	4
Pyruvate:ferredoxin oxidoreductase, alpha subunit (EC 1.2.7.1)	5	4	16	15
Pyruvate:ferredoxin oxidoreductase, beta subunit (EC 1.2.7.1)	7	1	13	15
Pyruvate:ferredoxin oxidoreductase, delta subunit (EC 1.2.7.1)	1	1	5	6
Pyruvate:ferredoxin oxidoreductase, gamma subunit (EC 1.2.7.1)	1	5	15	8
Pyruvate-flavodoxin oxidoreductase (EC 1.2.7.-)	12	13	7	5
Biotin carboxyl carrier protein of oxaloacetate decarboxylase	0	0	1	1
Malate permease	1	0	3	3
Malolactic enzyme (EC 1.-.-.-)	0	1	1	0
NAD-dependent malic enzyme (EC 1.1.1.38)	0	5	2	1
NADP-dependent malic enzyme (EC 1.1.1.40)	6	17	29	20
Oxaloacetate decarboxylase alpha chain (EC 4.1.1.3)	0	1	3	3
Oxaloacetate decarboxylase beta chain (EC 4.1.1.3)	1	3	6	3
Phosphoenolpyruvate carboxykinase [ATP] (EC 4.1.1.49)	3	5	8	14
Phosphoenolpyruvate carboxykinase [GTP] (EC 4.1.1.32)	5	9	6	10
Phosphoenolpyruvate carboxylase (EC 4.1.1.31)	2	8	2	6
Phosphoenolpyruvate carboxylase, archaeal (EC 4.1.1.31)	2	0	2	4
Phosphoenolpyruvate synthase (EC 2.7.9.2)	11	8	23	9
Pyruvate carboxyl transferase (EC 6.4.1.1)	1	4	4	0
Pyruvate carboxyl transferase subunit A (EC 6.4.1.1)	3	2	3	12
Pyruvate carboxyl transferase subunit B (EC 6.4.1.1)	5	1	24	15
Pyruvate kinase (EC 2.7.1.40)	6	4	17	15
Pyruvate,phosphate dikinase (EC 2.7.9.1)	16	5	14	18
Glycolate dehydrogenase (EC 1.1.99.14), FAD-binding subunit GlcE	6	2	2	0
Glycolate dehydrogenase (EC 1.1.99.14), iron-sulfur subunit GlcF	7	5	9	3
Glycolate dehydrogenase (EC 1.1.99.14), subunit GlcD	11	4	17	31
Phosphoglycolate phosphatase (EC 3.1.3.18)	7	6	7	11
2-oxoglutarate dehydrogenase E1 component (EC 1.2.4.2)	8	5	7	4
Aconitate hydratase X, predicted	2	0	0	0
Archaeal succinyl-CoA ligase [ADP-forming] alpha chain (EC 6.2.1.5)	0	0	0	3
Citrate synthase (si) (EC 2.3.3.1)	11	9	13	7
Dihydrolipoamide dehydrogenase (EC 1.8.1.4)	10	4	7	15
Dihydrolipoamide dehydrogenase of 2-oxoglutarate dehydrogenase (EC 1.8.1.4)	0	2	5	2
Dihydrolipoamide succinyltransferase component (E2) of 2-oxoglutarate dehydrogenase complex (EC 2.3.1.61)	6	3	2	1
Fumarate hydratase class I, aerobic (EC 4.2.1.2)	3	3	9	11
Fumarate hydratase class II (EC 4.2.1.2)	6	3	9	1
Isocitrate dehydrogenase [NADP] (EC 1.1.1.42)	5	7	8	6
Isocitrate dehydrogenase [NAD] (EC 1.1.1.41)	9	0	6	5
Malate dehydrogenase (EC 1.1.1.37)	5	2	7	5
Putative malate dehydrogenase (EC 1.1.1.37), similar to archaeal MJ1425	4	0	4	7
Succinate dehydrogenase flavoprotein subunit (EC 1.3.99.1)	12	12	34	18
Succinate dehydrogenase iron-sulfur protein (EC 1.3.99.1)	5	11	9	1
Succinyl-CoA ligase [ADP-forming] alpha chain (EC 6.2.1.5)	7	4	16	10
Succinyl-CoA ligase [ADP-forming] beta chain (EC 6.2.1.5)	6	6	15	21
2,3-bisphosphoglycerate-independent phosphoglycerate mutase (EC 5.4.2.1)	0	0	1	0
2,3-bisphosphoglycerate-independent phosphoglycerate mutase, archaeal type (EC 5.4.2.1)	1	7	10	16
Enolase (EC 4.2.1.11)	7	12	29	17
Fructose-1,6-bisphosphatase, GlpX type (EC 3.1.3.11)	5	1	1	10
Fructose-1,6-bisphosphatase, type I (EC 3.1.3.11)	2	3	1	6
Fructose-1,6-bisphosphatase, type V, archaeal (EC 3.1.3.11)	4	0	10	15
Fructose-bisphosphate aldolase, archaeal class I (EC 4.1.2.13)	0	0	3	0
Glucose-6-phosphate isomerase (EC 5.3.1.9)	4	6	10	3
Glucose-6-phosphate isomerase, archaeal (EC 5.3.1.9)	0	1	0	1
Glyceraldehyde-3-phosphate: ferredoxin oxidoreductase (EC 1.2.7.6)	1	1	0	0
NAD(P)-dependent glyceraldehyde 3-phosphate dehydrogenase archaeal (EC 1.2.1.59)	0	0	0	1
Phosphoglycerate kinase (EC 2.7.2.3)	6	6	14	16
Phosphoglycerate mutase (EC 5.4.2.1)	5	3	10	3
Pyrophosphate--fructose 6-phosphate 1-phosphotransferase, alpha subunit (EC 2.7.1.90)	1	2	0	5
Triosephosphate isomerase (EC 5.3.1.1)	10	5	18	5
Glucose-6-phosphate 1-dehydrogenase (EC 1.1.1.49)	6	5	3	4
6-phosphogluconolactonase (EC 3.1.1.31)	0	1	0	0
6-phosphogluconolactonase (EC 3.1.1.31), eukaryotic type	2	1	3	1
6-phosphogluconate dehydrogenase, decarboxylating (EC 1.1.1.44)	8	4	5	6
Transketolase (EC 2.2.1.1)	7	9	18	15
Transketolase, C-terminal section (EC 2.2.1.1)	0	1	11	2
Transketolase, N-terminal section (EC 2.2.1.1)	2	5	13	6
Ribose-phosphate pyrophosphokinase (EC 2.7.6.1)	13	7	20	17
Glucokinase (EC 2.7.1.2)	6	1	12	8
Gluconate dehydratase (EC 4.2.1.39)	4	1	5	0
Gluconolactonase (EC 3.1.1.17)	1	2	1	0
NAD-dependent glyceraldehyde-3-phosphate dehydrogenase (EC 1.2.1.12)	7	10	12	19
Non-phosphorylating glyceraldehyde-3-phosphate dehydrogenase (NADP) (EC 1.2.1.9)	0	0	0	1
OpcA, an allosteric effector of glucose-6-phosphate dehydrogenase, actinobacterial	1	0	0	0
OpcA, an allosteric effector of glucose-6-phosphate dehydrogenase, cyanobacterial	3	1	0	2
Phosphogluconate dehydratase (EC 4.2.1.12)	0	1	0	0
Polyphosphate glucokinase (EC 2.7.1.63)	0	1	0	0
Alanine dehydrogenase (EC 1.4.1.1)	8	7	12	6
Alanine racemase (EC 5.1.1.1)	8	7	17	15
Alanine racemase, catabolic (EC 5.1.1.1)	0	1	0	0
Branched-chain amino acid aminotransferase (EC 2.6.1.42)	7	7	25	19
D-alanine aminotransferase (EC 2.6.1.21)	0	0	1	2
D-amino acid dehydrogenase small subunit (EC 1.4.99.1)	3	3	1	0
L-serine dehydratase (EC 4.3.1.17)	0	0	5	2
L-serine dehydratase, alpha subunit (EC 4.3.1.17)	0	1	1	0
L-serine dehydratase, beta subunit (EC 4.3.1.17)	0	0	1	1
Omega-amino acid--pyruvate aminotransferase (EC 2.6.1.18)	0	0	1	5
Valine--pyruvate aminotransferase (EC 2.6.1.66)	1	1	2	2
Phosphoenolpyruvate-dihydroxyacetone phosphotransferase (EC 2.7.1.121), dihydroxyacetone binding subunit DhaK	0	0	3	10
Phosphoenolpyruvate-dihydroxyacetone phosphotransferase (EC 2.7.1.121), ADP-binding subunit DhaL	0	0	0	8
Phosphoenolpyruvate-dihydroxyacetone phosphotransferase (EC 2.7.1.121), subunit DhaM	2	0	2	4
DHA-specific IIA component	0	0	0	2
DHA-specific EI component	0	0	1	1
Phosphoenolpyruvate-dihydroxyacetone phosphotransferase operon regulatory protein DhaR	1	0	1	6
Putative dihydroxyacetone kinase (EC 2.7.1.29), dihydroxyacetone binding subunit	0	1	0	0
6-phosphofructokinase, eukaryotic type (EC 2.7.1.11)	3	1	2	0
Pyrophosphate--fructose 6-phosphate 1-phosphotransferase, beta subunit (EC 2.7.1.90)	2	1	0	0
Fructose-bisphosphate aldolase class I (EC 4.1.2.13)	3	7	2	0
Fructose-bisphosphate aldolase class II (EC 4.1.2.13)	8	4	5	5
Predicted Fructose-bisphosphate aldolase (EC 4.1.2.13) in Geobacter	0	1	0	1
Putative phosphoenolpyruvate synthase/pyruvate phosphate dikinase, N-terminal domain	0	0	2	0
Putative phosphoenolpyruvate synthase/pyruvate phosphate dikinase, C-terminal domain	0	0	2	0
5,10-methylenetetrahydrofolate reductase (EC 1.5.1.20)	8	7	15	13
5-formyltetrahydrofolate cyclo-ligase (EC 6.3.3.2)	2	0	3	1
F420-dependent methylenetetrahydromethanopterin dehydrogenase (EC 1.5.99.9)	0	0	0	1
Formate--tetrahydrofolate ligase (EC 6.3.4.3)	5	2	23	18
Formiminotetrahydrofolate cyclodeaminase (EC 4.3.1.4)	1	0	0	1
Formyltetrahydrofolate deformylase (EC 3.5.1.10)	2	0	1	0
Methenyltetrahydrofolate cyclohydrolase (EC 3.5.4.9)	0	0	0	1
Methylene tetrahydromethanopterin dehydrogenase (EC 1.5.99.9)	1	0	2	0
N(5),N(10)-methenyltetrahydromethanopterin cyclohydrolase (EC 3.5.4.27)	0	1	2	0
3-ketoacyl-CoA thiolase (EC 2.3.1.16)	0	0	1	1
Acetoacetyl-CoA reductase (EC 1.1.1.36)	2	1	3	0
Acetyl-CoA acetyltransferase (EC 2.3.1.9)	4	2	9	6
Fumarate hydratase class I, anaerobic (EC 4.2.1.2)	0	1	0	0
GDSL-like lipase/acylhydrolase	2	0	0	0
Isocitrate lyase (EC 4.1.3.1)	2	1	2	1
Malyl-CoA lyase (EC 4.1.3.24)	1	1	1	1
Methylcrotonyl-CoA carboxylase biotin-containing subunit (EC 6.4.1.4)	2	3	2	1
Methylcrotonyl-CoA carboxylase carboxyl transferase subunit (EC 6.4.1.4)	5	3	9	4
Phosphoglyceromutase	6	2	14	5
Propionyl-CoA carboxylase beta chain (EC 6.4.1.3)	0	1	1	3
Serine hydroxymethyltransferase (EC 2.1.2.1)	19	6	25	31
Serine--glyoxylate aminotransferase (EC 2.6.1.45)	6	2	16	14
Serine--pyruvate aminotransferase (EC 2.6.1.51)	0	1	4	12
Serine-pyruvate aminotransferase/archaeal aspartate aminotransferase	0	2	0	1
Succinyl-CoA:3-ketoacid-coenzyme A transferase subunit A (EC 2.8.3.5)	0	1	0	2
Succinyl-CoA:3-ketoacid-coenzyme A transferase subunit B (EC 2.8.3.5)	0	0	2	0
crotonyl-CoA reductase	0	0	0	4
cytosolic long-chain acyl-CoA thioester hydrolase family protein	0	2	0	0
decarboxylase	0	0	1	1
isobutyryl-CoA dehydrogenase	0	0	2	0
low-specificity D-threonine aldolase	2	2	1	0
polyhydroxyalkanoate synthesis repressor PhaR	0	1	0	1
putative glycerate kinase	0	0	0	1
Formylmethanofuran dehydrogenase subunit A (EC 1.2.99.5)	1	0	2	0
Formylmethanofuran dehydrogenase subunit B (EC 1.2.99.5)	0	0	0	1
Formylmethanofuran dehydrogenase (tungsten) subunit B (EC 1.2.99.5)	0	0	0	1
Formylmethanofuran dehydrogenase subunit C (EC 1.2.99.5)	1	0	1	0
Formylmethanofuran dehydrogenase (tungsten) subunit C (EC 1.2.99.5)	0	0	0	1
Formylmethanofuran dehydrogenase (tungsten) subunit D (EC 1.2.99.5)	0	0	0	1
Formylmethanofuran dehydrogenase (tungsten) operon gene F (polyferredoxin)	0	0	1	2
Formylmethanofuran dehydrogenase (molybdenum) operon gene G	0	0	1	1
Formylmethanofuran dehydrogenase (tungsten) operon gene G	0	1	0	0
Formylmethanofuran--tetrahydromethanopterin N-formyltransferase (EC 2.3.1.101)	0	1	3	3
F420-dependent N(5),N(10)-methylenetetrahydromethanopterin reductase (EC 1.5.99.11)	5	2	0	1
N5-methyltetrahydromethanopterin:coenzyme M methyltransferase subunit B (EC 2.1.1.86)	0	0	0	1
N5-methyltetrahydromethanopterin:coenzyme M methyltransferase subunit C (EC 2.1.1.86)	0	0	1	0
N5-methyltetrahydromethanopterin:coenzyme M methyltransferase subunit H (EC 2.1.1.86)	0	0	3	0
N5-methyltetrahydromethanopterin:coenzyme M methyltransferase subunit X	1	0	0	0
Methyl coenzyme M reductase II alpha subunit (EC 2.8.4.1)	0	0	0	1
CoB--CoM heterodisulfide reductase subunit A (EC 1.8.98.1)	12	11	47	67
CoB--CoM heterodisulfide reductase subunit B (EC 1.8.98.1)	10	4	21	31
CoB--CoM heterodisulfide reductase subunit C (EC 1.8.98.1)	4	2	24	16
Methanol:corrinoid methyltransferase	2	1	0	1
Methylcobalamin:coenzyme M methyltransferase, methanol-specific	1	4	10	11
Dimethylamine methyltransferase corrinoid protein	0	0	0	6
Trimethylamine:corrinoid methyltransferase	1	7	7	23
Trimethylamine methyltransferase corrinoid protein	0	1	1	6
Methylcobalamin:coenzyme M methyltransferase, methylamine-specific	0	0	1	0
D-arabino-3-hexulose 6-phosphate formaldehyde lyase	1	0	0	0
6-phospho-3-hexuloisomerase	2	0	0	0
Formaldehyde activating enzyme	0	0	5	8
Alpha-glucosidase, family 31 of glycosyl hydrolases, COG1501	1	1	1	3
Glucose-1-phosphate adenylyltransferase (EC 2.7.7.27)	13	7	7	15
Glycogen biosynthesis protein GlgD, glucose-1-phosphate adenylyltransferase family	1	0	1	2
Glycogen branching enzyme, GH-57-type, archaeal (EC 2.4.1.18)	4	2	11	8
Glycogen synthase, ADP-glucose transglucosylase (EC 2.4.1.21)	6	6	12	10
Predicted glycogen synthase, ADP-glucose transglucosylase (EC 2.4.1.21), Actinobacterial type	1	3	5	2
Putative glycogen debranching enzyme, archaeal type, TIGR01561	2	6	7	3
Phosphoribulokinase (EC 2.7.1.19)	3	1	1	1
Ribose 1,5-bisphosphate or 5-ribose-1,2-cyclic phosphate dehydrogenase	1	1	1	10
Ribulose bisphosphate carboxylase large chain (EC 4.1.1.39)	1	1	1	0
Ribulose bisphosphate carboxylase small chain (EC 4.1.1.39)	0	0	1	0
Ribulose-1,5-bisphosphate carboxylase, Type III (EC 4.1.1.39)	1	1	2	0
Carbonic anhydrase (EC 4.2.1.1)	3	3	4	5
Carbon dioxide concentrating mechanism protein CcmM	1	0	0	0
NADH dehydrogenase (EC 1.6.99.3)	6	5	8	8
High-affnity carbon uptake protein Hat/HatR	2	7	16	3
Bicarbonate transporter, bicarbonate binding protein 2	0	0	1	0
Carbon dioxide concentrating mechanism protein CcmO	0	1	0	0
Hypothetical transmembrane protein coupled to NADH-ubiquinone oxidoreductase chain 5 homolog	1	1	0	0
NADH dehydrogenase subunit 5, Involved in CO2 fixation	0	1	0	0
Possible pterin-4 alpha-carbinolamine dehydratase-like protein	0	1	1	0
RuBisCO operon transcriptional regulator	0	1	1	0
RuBisCO operon transcriptional regulator CbbR	1	0	2	0
Rubisco activation protein CbbO	1	2	4	0
Rubisco activation protein CbbQ	1	3	1	0
Sensory subunit of low CO2-induced protein complex, putative	0	2	0	0
carboxysome shell protein CsoS1	0	0	1	0
carboxysome shell protein CsoS2	1	0	0	0
probable RuBisCo-expression protein CbbX	0	1	0	0
putative sodium-dependent bicarbonate transporter	2	1	0	0
ribulose 1,5-bisphosphate carboxylase/oxygenase activase	0	1	0	0
2-oxoglutarate/malate translocator	0	0	1	0
Aminomethyltransferase (glycine cleavage system T protein) (EC 2.1.2.10)	6	4	20	18
D-glycerate 3-kinase (EC 2.7.1.31), plant type	0	0	1	0
Glycine cleavage system H protein	5	2	13	9
Glycine dehydrogenase [decarboxylating] (glycine cleavage system P protein) (EC 1.4.4.2)	2	2	6	2
Glycine dehydrogenase [decarboxylating] (glycine cleavage system P1 protein) (EC 1.4.4.2)	4	3	19	18
Glycine dehydrogenase [decarboxylating] (glycine cleavage system P2 protein) (EC 1.4.4.2)	6	6	16	15
Glyoxylate carboligase (EC 4.1.1.47)	2	0	1	0
Malate synthase (EC 2.3.3.9)	5	3	4	2
Malate synthase G (EC 2.3.3.9)	0	1	1	0
2,3-butanediol dehydrogenase, R-alcohol forming, (R)- and (S)-acetoin-specific (EC 1.1.1.4)	0	0	0	3
Acetoin dehydrogenase E1 component alpha-subunit (EC 1.2.4.-)	3	1	7	5
Acetoin dehydrogenase E1 component beta-subunit (EC 1.2.4.-)	2	4	4	4
Acetolactate synthase large subunit (EC 2.2.1.6)	11	9	17	12
Acetolactate synthase small subunit (EC 2.2.1.6)	6	3	3	2
Dihydrolipoamide acetyltransferase component (E2) of acetoin dehydrogenase complex (EC 2.3.1.-)	4	1	5	4
Dihydrolipoamide dehydrogenase of acetoin dehydrogenase (EC 1.8.1.4)	0	0	2	2
Transcriptional activator of acetoin dehydrogenase operon AcoR	0	0	1	4
3-hydroxyacyl-CoA dehydrogenase (EC 1.1.1.35)	0	2	0	0
3-hydroxybutyryl-CoA dehydratase (EC 4.2.1.55)	2	4	8	7
3-hydroxybutyryl-CoA dehydrogenase (EC 1.1.1.157)	4	6	5	3
Acetoacetate metabolism regulatory protein AtoC	6	3	14	11
Butyrate kinase (EC 2.7.2.7)	4	2	2	0
Butyrate-acetoacetate CoA-transferase subunit A (EC 2.8.3.9)	1	0	0	0
Electron transfer flavoprotein, alpha subunit	5	11	32	14
Electron transfer flavoprotein, beta subunit	4	12	26	15
Electron transfer flavoprotein-ubiquinone oxidoreductase (EC 1.5.5.1)	3	0	6	0
Enoyl-CoA hydratase (EC 4.2.1.17)	11	13	16	4
Ferredoxin-like protein	2	2	0	0
Probable electron transfer flavoprotein-quinone oxidoreductase FixC (EC 1.5.5.-)	0	1	1	0
D-lactate dehydrogenase (EC 1.1.1.28)	2	2	1	0
L-lactate dehydrogenase (EC 1.1.1.27)	0	2	1	1
Pyruvate formate-lyase (EC 2.3.1.54)	2	4	7	19
Pyruvate formate-lyase activating enzyme (EC 1.97.1.4)	1	4	15	17
Formate efflux transporter (TC 2.A.44 family)	0	3	3	0
Alcohol dehydrogenase (EC 1.1.1.1)	16	13	16	22
Sugar/maltose fermentation stimulation protein homolog	2	0	2	4
NADH-dependent butanol dehydrogenase A (EC 1.1.1.-)	1	2	3	2
COG2152 predicted glycoside hydrolase	4	0	12	12
COG1649 predicted glycoside hydrolase	2	2	2	4
COG1306 predicted glycoside hydrolase	2	1	4	2
Carbohydrate Esterase Family 4	0	1	1	2
Polysaccharide deacetylase	17	13	36	22
Peptidoglycan N-acetylglucosamine deacetylase (EC 3.5.1.-)	0	0	1	0
N-acetylhexosamine 1-kinase	1	0	0	0
Uncharacterized protein YphG, TPR-domain containing	2	1	3	7
D-amino acid dehydrogenase large subunit (EC 1.4.99.1)	0	0	2	2
Glucose-methanol-choline (GMC) oxidoreductase:NAD binding site	3	2	1	1
Glycerol dehydrogenase (EC 1.1.1.6)	1	1	0	1
Glycerol-1-phosphate dehydrogenase [NAD(P)] (EC 1.1.1.261)	1	2	1	2
Methanol dehydrogenase large subunit protein (EC 1.1.99.8)	0	1	1	0
Proline dehydrogenase (EC 1.5.99.8) (Proline oxidase)	2	2	4	0
Na(+)-translocating NADH-quinone reductase subunit A (EC 1.6.5.-)	1	0	0	0
Na(+)-translocating NADH-quinone reductase subunit B (EC 1.6.5.-)	2	0	5	1
Na(+)-translocating NADH-quinone reductase subunit C (EC 1.6.5.-)	0	0	3	0
Na(+)-translocating NADH-quinone reductase subunit E (EC 1.6.5.-)	1	0	2	0
Na(+)-translocating NADH-quinone reductase subunit F (EC 1.6.5.-)	2	0	2	0
Electron transport complex protein RnfA	1	0	4	1
Electron transport complex protein RnfB	2	1	3	3
Electron transport complex protein RnfC	2	1	9	5
Electron transport complex protein RnfD	4	2	4	0
Electron transport complex protein RnfE	0	2	6	2
Electron transport complex protein RnfG	0	1	1	2
Coenzyme F420 hydrogenase maturation protease (EC 3.4.24.-)	0	1	1	2
Coenzyme F420-reducing hydrogenase, alpha subunit	0	0	4	0
Coenzyme F420-reducing hydrogenase, beta subunit	2	3	4	13
Coenzyme F420-reducing hydrogenase, gamma subunit	1	1	5	1
Fe-S-cluster-containing hydrogenase components 1	6	4	14	15
Fe-S-cluster-containing hydrogenase components 2	1	1	2	5
NAD-reducing hydrogenase subunit HoxE (EC 1.12.1.2)	1	5	2	4
NAD-reducing hydrogenase subunit HoxF (EC 1.12.1.2)	14	1	22	15
NAD-reducing hydrogenase subunit HoxH (EC 1.12.1.2)	3	3	5	8
NAD-reducing hydrogenase subunit HoxU (EC 1.12.1.2)	1	2	0	4
NAD-reducing hydrogenase subunit HoxY (EC 1.12.1.2)	0	0	3	7
NADH-reducing hydrogenase maturation factor	1	2	1	1
NADP-reducing hydrogenase, subunit A	0	0	0	1
NADP-reducing hydrogenase, subunit B	2	0	2	0
NADP-reducing hydrogenase, subunit C	0	3	3	1
Ni,Fe-hydrogenase I cytochrome b subunit	3	2	1	0
Ni,Fe-hydrogenase I large subunit	0	0	0	1
Ni,Fe-hydrogenase III large subunit	0	1	1	0
Ni,Fe-hydrogenase III small subunit	1	0	0	0
Ni,Fe-hydrogenase maturation factor	2	1	7	0
Ni/Fe-hydrogenase 2 B-type cytochrome subunit	0	5	3	1
Nickel-dependent hydrogenase, large subunit	4	3	9	9
Nickel-dependent hydrogenase, small subunit	1	0	0	0
Periplasmic [Fe] hydrogenase (EC 1.12.7.2)	9	3	4	4
Periplasmic [Fe] hydrogenase large subunit (EC 1.12.7.2)	2	3	2	5
Quinone-reactive Ni/Fe hydrogenase, cytochrome b subunit	0	0	1	0
Quinone-reactive Ni/Fe-hydrogenase large chain (EC 1.12.5.1)	0	1	3	11
Quinone-reactive Ni/Fe-hydrogenase small chain precursor (EC 1.12.5.1)	1	0	4	4
Signal transduction histidine kinase HoxJ (hydrogenase regulation)	0	2	0	2
Sulfhydrogenase II subunit b	0	0	0	1
Sulfhydrogenase II subunit g	0	0	2	1
Uptake hydrogenase large subunit (EC 1.12.99.6)	2	0	5	7
Uptake hydrogenase small subunit precursor (EC 1.12.99.6)	0	3	0	0
[Fe] hydrogenase, HymA subunit, putative	2	1	1	0
[Fe] hydrogenase, HymB subunit, putative	0	0	0	1
[Ni/Fe] hydrogenase, group 1, large subunit	1	4	2	1
[Ni/Fe] hydrogenase, group 1, small subunit	2	0	3	1
cytochrome-c3 hydrogenase alpha chain	0	2	2	0
heterodisulfide reductase, subunit A/methylviologen reducing hydrogenase, subunit delta	15	18	46	74
hydrogenase, subunit gamma related protein	2	3	4	12
hydrogenase/sulfur reductase, alpha subunit	0	2	4	10
hydrogenase/sulfur reductase, delta subunit	1	0	2	0
hydrogenase/sulfur reductase, gamma subunit	0	0	1	0
methyl viologen-reducing hydrogenase, delta subunit homolog FlpD	0	0	0	1
[NiFe] hydrogenase nickel incorporation protein HypA	0	4	7	5
[NiFe] hydrogenase nickel incorporation-associated protein HypB	5	5	2	6
[NiFe] hydrogenase metallocenter assembly protein HypC	0	1	6	3
[NiFe] hydrogenase metallocenter assembly protein HypD	5	4	22	14
[NiFe] hydrogenase metallocenter assembly protein HypE	10	5	17	14
[NiFe] hydrogenase metallocenter assembly protein HypF	10	10	32	24
Energy-conserving hydrogenase (ferredoxin), subunit A	0	1	0	1
Hydrogenase maturation protease (EC 3.4.24.-)	1	4	5	3
Hydrogenase maturation factor hoxQ	0	1	0	0
Hydrogenase maturation factor hoxV	1	0	0	0
Hydrogenase nickel incorporation protein hypB	0	1	0	0
Hydrogenase metallocenter assembly protein HypD	0	1	0	0
Hydrogenase transcriptional regulatory protein hoxA	0	1	1	1
CoB--CoM-reducing hydrogenase (Cys) alpha subunit	3	2	21	13
CoB--CoM-reducing hydrogenase (Cys) gamma subunit	0	2	11	8
CoB--CoM-reducing hydrogenase (Cys) delta subunit	0	0	0	1
Coenzyme F(420)H(2) dehydrogenase (methanophenazine) subunit FpoK	0	0	0	1
Coenzyme F(420)H(2) dehydrogenase (methanophenazine) subunit FpoN	0	0	2	1
carbon monoxide dehydrogenase D protein	0	5	2	2
Carbon monoxide dehydrogenase F protein	3	3	2	7
carbon monoxide dehydrogenase E protein	4	2	4	4
Carbon monoxide dehydrogenase small chain (EC 1.2.99.2)	1	0	2	7
Carbon monoxide dehydrogenase medium chain (EC 1.2.99.2)	3	2	3	2
Carbon monoxide dehydrogenase large chain (EC 1.2.99.2)	4	2	5	5
carbon monoxide dehydrogenase G protein	1	0	0	0
Carbon monoxide dehydrogenase large chain (EC 1.2.99.2) without typical motifs	0	0	2	0
Carbon-monoxide dehydrogenase form II, large subunit (EC 1.2.99.2)	0	1	2	0
Uncharacterized MobA-related protein	0	0	1	1
Carbon monoxide dehydrogenase large chain (EC 1.2.99.2) parolog without usual motifs	4	1	2	0
Hypothetical lactonase in carbon monoxide dehydrogenase cluster	1	0	0	0
Energy-conserving hydrogenase (ferredoxin), subunit C	2	1	0	6
Energy-conserving hydrogenase (ferredoxin), subunit E	2	3	2	9
Energy-conserving hydrogenase (ferredoxin), subunit F	2	0	0	0
Fumarate reductase flavoprotein subunit (EC 1.3.99.1)	1	3	2	0
Putative succinate dehydrogenase cytochrome b subunit	1	0	0	1
Succinate dehydrogenase cytochrome b subunit	1	3	9	0
Succinate dehydrogenase cytochrome b-556 subunit	1	2	0	0
Succinate dehydrogenase cytochrome b558 subunit	1	1	0	0
Succinate dehydrogenase hydrophobic membrane anchor protein	1	0	0	0
putative succinate dehydrogenase [membrane anchor subunit] (succinic dehydrogenase)	0	0	1	0
Coenzyme F420 hydrogenase beta subunit (FrcB) (EC 1.12.98.1)	0	1	1	0
coenzyme F420-reducing hydrogenase, beta subunit homolog	0	1	0	1
NAD(P)H-quinone oxidoreductase chain 5 (EC 1.6.5.2)	0	0	1	0
NAD(P)H-quinone oxidoreductase chain I (EC 1.6.5.2)	0	0	1	1
NAD(P)H-quinone oxidoreductase chain J (EC 1.6.5.2)	0	2	0	2
NAD(P)H-quinone oxidoreductase chain K (EC 1.6.5.2)	0	1	0	0
NAD(P)H-quinone oxidoreductase subunit 3 (EC 1.6.5.2)	1	0	0	2
NADH dehydrogenase I subunit 4, Involved in photosystem-1 cyclic electron flow	0	0	1	0
NADH dehydrogenase subunit 1	0	0	1	0
NADH dehydrogenase subunit 2	0	1	0	0
NADH dehydrogenase subunit 4L	0	0	1	0
NADH dehydrogenase subunit 5	3	1	0	0
NADH dehydrogenase, subunit 5	2	0	1	2
NADH ubiquinone oxidoreductase chain A (EC 1.6.5.3)	1	1	3	1
NADH-ubiquinone oxidoreductase chain B (EC 1.6.5.3)	9	2	0	10
NADH-ubiquinone oxidoreductase chain C (EC 1.6.5.3)	7	5	3	9
NADH-ubiquinone oxidoreductase chain D (EC 1.6.5.3)	10	12	11	14
NADH-ubiquinone oxidoreductase chain E (EC 1.6.5.3)	3	5	10	8
NADH-ubiquinone oxidoreductase chain F (EC 1.6.5.3)	2	5	5	3
NADH-ubiquinone oxidoreductase chain G (EC 1.6.5.3)	5	10	10	4
NADH-ubiquinone oxidoreductase chain H (EC 1.6.5.3)	15	10	7	19
NADH-ubiquinone oxidoreductase chain I (EC 1.6.5.3)	5	4	9	9
NADH-ubiquinone oxidoreductase chain J (EC 1.6.5.3)	5	2	3	3
NADH-ubiquinone oxidoreductase chain K (EC 1.6.5.3)	5	3	10	6
NADH-ubiquinone oxidoreductase chain L (EC 1.6.5.3)	23	17	14	21
NADH-ubiquinone oxidoreductase chain M (EC 1.6.5.3)	10	7	16	45
NADH-ubiquinone oxidoreductase chain N (EC 1.6.5.3)	12	13	7	19
Putative subunit of NAD(P)H:quinone oxidoreductase	0	1	0	0
Formate dehydrogenase H (EC 1.2.1.2)	0	1	3	4
Formate dehydrogenase O alpha subunit (EC 1.2.1.2)	1	1	0	0
Formate dehydrogenase O beta subunit (EC 1.2.1.2)	0	5	5	10
Formate dehydrogenase O gamma subunit (EC 1.2.1.2)	2	1	2	5
Formate dehydrogenase N beta subunit (EC 1.2.1.2)	0	0	1	1
Formate dehydrogenase alpha subunit (EC 1.2.1.2)	0	2	6	10
Formate dehydrogenase beta subunit (EC 1.2.1.2)	0	0	2	5
ABC transporter involved in cytochrome c biogenesis, ATPase component CcmA	2	2	1	9
ABC transporter involved in cytochrome c biogenesis, CcmB subunit	5	3	4	6
Cytochrome c heme lyase subunit CcmF	5	8	12	7
Cytochrome c heme lyase subunit CcmH	1	0	0	0
Cytochrome c heme lyase subunit CcmL	1	2	0	0
Cytochrome c-type biogenesis protein CcdA (DsbD analog)	3	3	5	5
Cytochrome c-type biogenesis protein CcmC, putative heme lyase for CcmE	1	3	0	5
Cytochrome c-type biogenesis protein CcmD, interacts with CcmCE	0	0	1	0
Cytochrome c-type biogenesis protein CcmE, heme chaperone	2	3	1	0
Cytochrome c-type biogenesis protein CcmG/DsbE, thiol:disulfide oxidoreductase	1	1	5	4
Cytochrome c-type biogenesis protein Ccs1/ResB	1	5	7	2
Cytochrome c-type biogenesis protein CcsA/ResC	2	1	1	1
Cytochrome c-type biogenesis protein DsbD, protein-disulfide reductase (EC 1.8.1.8)	8	1	4	0
Cytochrome c-type biogenesis protein ResA	1	4	2	2
Hypothetical protein distantly related to cytochrome C-type biogenesis protein CcdA	0	0	0	1
Periplasmic thiol:disulfide interchange protein DsbA	4	5	13	4
Periplasmic thiol:disulfide oxidoreductase DsbB, required for DsbA reoxidation	0	1	1	0
Putative cytochrome C-type biogenesis protein	0	2	2	1
Thiol:disulfide oxidoreductase related to ResA	8	6	10	4
Formate dehydrogenase chain D (EC 1.2.1.2)	5	0	15	6
Formate dehydrogenase related protein	1	0	1	2
Formate dehydrogenase-O, iron-sulfur subunit (EC 1.2.1.2)	0	0	2	2
Formate dehydrogenase-O, major subunit (EC 1.2.1.2)	3	7	20	11
Formate hydrogenlyase subunit 3	2	3	1	1
Formate hydrogenlyase subunit 3/Multisubunit Na+/H+ antiporter, MnhD subunit	1	5	0	1
Formate hydrogenlyase subunit 4	1	1	2	0
Formate hydrogenlyase subunit 5	0	0	2	4
Formate hydrogenlyase subunit 6	0	0	0	2
Formate hydrogenlyase subunit 7	4	1	0	4
Formate hydrogenlyase transcriptional activator	3	1	0	0
Hydrogenase-4 component D (EC 1.-.-.-)	1	1	0	0
Hydrogenase-4 component E (EC 1.-.-.-)	0	2	1	0
Hydrogenase-4 component F (EC 1.-.-.-)	3	2	0	0
Hydrogenase-4 component G (EC 1.-.-.-)	0	3	0	2
Hydrogenase-4 component H (EC 1.-.-.-)	0	0	0	3
Hydrogenase-4 component I (EC 1.-.-.-)	0	0	0	1
Hydrogenase-4 transcriptional activator	0	2	0	0
NAD-dependent formate dehydrogenase alpha subunit	5	4	5	2
NAD-dependent formate dehydrogenase beta subunit	0	1	3	1
NAD-dependent formate dehydrogenase gamma subunit	1	2	2	0
Putative formate dehydrogenase oxidoreductase protein	1	1	2	0
formate dehydrogenase formation protein FdhE	1	1	1	0
tungsten-containing formate dehydrogenase alpha subunit	0	1	3	0
tungsten-containing formate dehydrogenase beta subunit	1	1	1	0
Cytochrome b6-f complex iron-sulfur subunit PetC1 (Rieske iron sulfur protein EC 1.10.99.1)	1	2	0	0
Cytochrome b6-f complex alternative Rieske iron sulfur protein PetC2	0	1	0	0
Cytochrome b6-f complex subunit, cytochrome b6	0	1	0	0
Ferredoxin-NADP(+) reductase (EC 1.18.1.2)	1	2	0	0
Carbon monoxide-induced hydrogenase membrane protein CooM	0	0	1	2
Carbon monoxide-induced hydrogenase proton translocating subunit CooK	0	1	0	2
Carbon monoxide-induced hydrogenase large subunit CooH	0	0	1	2
Carbon monoxide dehydrogenase CooS subunit (EC 1.2.99.2)	6	4	22	19
CO dehydrogenase iron-sulfur protein CooF (EC 1.2.99.2)	1	0	3	4
CO dehydrogenase/acetyl-CoA synthase, acetyl-CoA synthase subunit (EC 2.3.1.169)	2	5	17	18
Acetyl-CoA synthase corrinoid iron-sulfur protein, large subunit	2	2	11	8
Acetyl-CoA synthase corrinoid iron-sulfur protein, small subunit	3	0	10	4
5-methyltetrahydrofolate:corrinoid iron-sulfur protein methyltransferase	1	0	4	6
CO dehydrogenase/acetyl-CoA synthase subunit alpha, CO dehydrogenase subcomplex (EC 1.2.99.2)	0	0	3	1
CO dehydrogenase/acetyl-CoA synthase subunit delta, corrinoid iron-sulfur subcomplex small subunit	0	0	1	0
CO dehydrogenase/acetyl-CoA synthase subunit epsilon, CO dehydrogenase subcomplex (EC 1.2.99.2)	0	0	0	1
CO dehydrogenase accessory protein CooC (nickel insertion)	1	1	14	14
Similar to carbon monoxide dehydrogenase CooS subunit	1	0	1	0
Alternative cytochrome c oxidase polypeptide CoxM (EC 1.9.3.1)	0	1	0	0
Alternative cytochrome c oxidase polypeptide CoxN (EC 1.9.3.1)	4	1	2	0
Alternative cytochrome c oxidase polypeptide CoxO (EC 1.9.3.1)	0	0	1	0
Alternative cytochrome c oxidase polypeptide CoxP (EC 1.9.3.1)	1	0	0	0
Cytochrome c oxidase (B(O/a)3-type) chain I (EC 1.9.3.1)	4	0	3	1
Cytochrome c oxidase (B(O/a)3-type) chain II (EC 1.9.3.1)	2	0	0	0
Cytochrome c oxidase polypeptide I (EC 1.9.3.1)	5	11	4	0
Cytochrome c oxidase polypeptide II (EC 1.9.3.1)	5	2	4	0
Cytochrome c oxidase polypeptide III (EC 1.9.3.1)	4	3	3	1
Cytochrome c oxidase subunit CcoN (EC 1.9.3.1)	2	1	1	1
Cytochrome c oxidase subunit CcoO (EC 1.9.3.1)	4	1	0	0
Cytochrome c oxidase subunit CcoP (EC 1.9.3.1)	2	1	2	0
Type cbb3 cytochrome oxidase biogenesis protein CcoG, involved in Cu oxidation	2	2	1	0
probable cytochrome oxidase (cbb3-type)	2	0	2	0
Octaheme tetrathionate reductase	3	3	1	0
Tetrathionate reductase subunit A	7	1	1	1
Tetrathionate reductase subunit B	0	0	0	2
Cytochrome c-type protein NapC	1	0	0	0
Functional role page for Chaperone protein TorD	2	1	1	1
Functional role page for TorCAD operon transcriptional regulatory protein TorR	0	0	2	0
Hypothetical iron-sulfur cluster binding protein YccM	1	3	3	0
Nitrate/TMAO reductases, membrane-bound tetraheme cytochrome c subunit	1	1	0	3
Sensor protein torS (EC 2.7.3.-)	0	0	2	0
Trimethylamine-N-oxide reductase (Cytochrome c) (EC 1.7.2.3)	1	1	1	0
Adenylylsulfate reductase alpha-subunit (EC 1.8.99.2)	2	0	2	8
Adenylylsulfate reductase beta-subunit (EC 1.8.99.2)	1	0	0	2
Anaerobic dehydrogenases, typically selenocysteine-containing	9	13	8	12
Anaerobic dimethyl sulfoxide reductase chain A (EC 1.8.99.-)	1	3	3	0
Anaerobic dimethyl sulfoxide reductase chain B (EC 1.8.99.-)	0	4	1	2
Anaerobic dimethyl sulfoxide reductase chain C (EC 1.8.99.-)	1	0	0	0
Arsenate reductase (EC 1.20.4.1)	5	6	7	5
CoB--CoM heterodisulfide reductase 2 iron-sulfur subunit D (EC 1.8.98.1)	2	4	10	11
CoB--CoM heterodisulfide reductase subunit D (EC 1.8.98.1)	2	2	9	25
Coenzyme F420-dependent oxidoreductase	2	0	2	0
Dissimilatory sulfite reductase (desulfoviridin), alpha and beta subunits	1	0	0	0
Ferredoxin reductase	0	2	3	1
Ferric reductase (1.6.99.14)	0	0	0	1
Flavodoxin reductases (ferredoxin-NADPH reductases) family 1	1	4	0	0
Heterodisulfide reductase, cytochrome reductase subunit	1	1	5	16
Heterodisulfide reductase, subunit A	5	4	15	34
Polysulfide reductase, subunit A, putative	0	1	0	0
Polysulfide reductase, subunit C, putative	1	0	1	3
Sulfite reductase alpha subunit (EC 1.8.99.1)	0	2	1	0
Sulfite reductase beta subunit (EC 1.8.99.1)	0	1	1	0
Sulfite reductase, dissimilatory-type gamma subunit (EC 1.8.99.3)	0	1	0	0
Thiosulfate reductase cytochrome B subunit	0	0	0	2
heterodisulfide reductase, iron-sulfur binding subunit, putative	1	3	7	18
heterodisulfide reductase, subunit E, putative	0	0	2	6
polysulfide reductase, subunit A	1	0	3	0
polysulfide reductase, subunit C	0	0	2	4
Menaquinone-cytochrome c reductase, cytochrome B subunit	0	0	0	2
Ubiquinol--cytochrome c reductase, cytochrome B subunit (EC 1.10.2.2)	3	3	10	1
Ubiquinol-cytochrome C reductase iron-sulfur subunit (EC 1.10.2.2)	3	1	1	0
ubiquinol cytochrome C oxidoreductase, cytochrome C1 subunit	0	2	1	0
Cytochrome d ubiquinol oxidase subunit I (EC 1.10.3.-)	2	5	4	3
Cytochrome d ubiquinol oxidase subunit II (EC 1.10.3.-)	6	4	4	0
Transport ATP-binding protein CydC	5	1	2	3
Transport ATP-binding protein CydCD	0	0	1	0
Transport ATP-binding protein CydD	0	2	1	1
putative Cytochrome bd2, subunit I	0	0	0	1
putative Cytochrome bd2, subunit II	0	1	0	0
ATP synthase A chain (EC 3.6.3.14)	9	3	1	10
ATP synthase B chain (EC 3.6.3.14)	3	0	1	2
ATP synthase C chain (EC 3.6.3.14)	1	3	4	2
ATP synthase alpha chain (EC 3.6.3.14)	9	12	8	16
ATP synthase beta chain (EC 3.6.3.14)	9	7	8	21
ATP synthase gamma chain (EC 3.6.3.14)	5	3	8	19
ATP synthase delta chain (EC 3.6.3.14)	1	3	2	2
ATP synthase epsilon chain (EC 3.6.3.14)	6	2	4	5
ATP synthase protein I	1	0	1	0
V-type ATP synthase subunit A (EC 3.6.3.14)	3	5	19	4
V-type ATP synthase subunit B (EC 3.6.3.14)	4	3	8	7
V-type ATP synthase subunit C (EC 3.6.3.14)	1	0	8	0
V-type ATP synthase subunit D (EC 3.6.3.14)	3	0	6	4
V-type ATP synthase subunit E (EC 3.6.3.14)	1	2	2	0
V-type ATP synthase subunit F (EC 3.6.3.14)	0	0	1	1
V-type ATP synthase subunit I (EC 3.6.3.14)	1	1	11	5
V-type ATP synthase subunit K (EC 3.6.3.14)	0	1	3	3
Biotin carboxyl carrier protein of methylmalonyl-CoA decarboxylase	0	0	2	3
Membrane protein associated with methylmalonyl-CoA decarboxylase	1	5	5	1
Glutaconyl-CoA decarboxylase alpha chain (EC 4.1.1.70)	0	0	1	0
Cytochrome c-552 precursor	3	0	1	0
Cytochrome c4	2	2	2	0
Cytochrome c551/c552	1	1	0	1
Cytochrome c552	0	0	1	0
Cytochrome c552 precursor (EC 1.7.2.2)	5	3	9	3
Cytochrome c553	1	1	1	0
Ferredoxin	26	35	85	104
Ferredoxin, 2Fe-2S	4	2	2	0
Photosystem II protein PsbV, cytochrome c550	0	1	0	0
Putative diheme cytochrome c-553	1	3	2	0
soluble [2Fe-2S] ferredoxin	0	1	0	0
Copper metallochaperone, bacterial analog of Cox17 protein	2	0	0	1
Cytochrome oxidase biogenesis protein Cox11-CtaG, copper delivery to Cox1	0	1	0	0
Cytochrome oxidase biogenesis protein Sco1/SenC/PrrC, putative copper metallochaperone	5	2	4	1
Cytochrome oxidase biogenesis protein Surf1, facilitates heme A insertion	1	2	0	0
Ferredoxin--NADP(+) reductase (EC 1.18.1.2)	0	0	2	0
Frataxin homolog CyaY, facilitates iron supply for heme A synthesis or Fe-S cluster assembly	0	2	0	0
Heme A synthase, cytochrome oxidase biogenesis protein Cox15-CtaA	3	1	4	0
Heme O synthase, protoheme IX farnesyltransferase (EC 2.5.1.-) COX10-CtaB	3	3	0	1
Type cbb3 cytochrome oxidase biogenesis protein CcoH	0	0	1	0
Putative analog of CcoH, COG3198	1	0	0	0
Type cbb3 cytochrome oxidase biogenesis protein CcoI	5	9	4	0
2',3'-cyclic-nucleotide 2'-phosphodiesterase (EC 3.1.4.16)	0	0	1	2
5'-nucleotidase (EC 3.1.3.5)	5	7	17	19
AMP nucleosidase (EC 3.2.2.4)	0	1	1	0
Adenine deaminase (EC 3.5.4.2)	7	6	13	9
Adenine phosphoribosyltransferase (EC 2.4.2.7)	6	4	4	3
Adenosine deaminase (EC 3.5.4.4)	3	3	6	6
Adenylate kinase (EC 2.7.4.3)	6	8	9	6
Adenylosuccinate lyase (EC 4.3.2.2)	12	4	21	17
Adenylosuccinate synthetase (EC 6.3.4.4)	5	7	22	14
Deoxyguanosinetriphosphate triphosphohydrolase (EC 3.1.5.1)	5	6	18	17
GMP synthase [glutamine-hydrolyzing] (EC 6.3.5.2)	13	13	30	20
Guanine deaminase (EC 3.5.4.3)	0	0	1	0
Guanylate kinase (EC 2.7.4.8)	2	5	6	5
Hypoxanthine-guanine phosphoribosyltransferase (EC 2.4.2.8)	10	5	7	14
IMP dehydrogenase related 2 (EC 1.7.1.7)	0	0	0	1
Inosine-5'-monophosphate dehydrogenase (EC 1.1.1.205)	16	9	22	20
Inosine-uridine preferring nucleoside hydrolase (EC 3.2.2.1)	0	3	3	3
Nucleoside diphosphate kinase (EC 2.7.4.6)	4	1	8	8
Polyphosphate kinase (EC 2.7.4.1)	6	10	5	2
Possible hypoxanthine oxidase XdhD (EC 1.-.-.-)	5	3	11	23
Xanthine-guanine phosphoribosyltransferase (EC 2.4.2.22)	1	2	3	0
preQ1-regulated inosine-uridine nucleoside hydrolase (EC 3.2.2.1)	0	0	0	1
putative Adenosine kinase (EC 2.7.1.20)	1	2	1	1
Amidophosphoribosyltransferase (EC 2.4.2.14)	11	8	29	16
Phosphoribosylamine--glycine ligase (EC 6.3.4.13)	6	6	27	15
Phosphoribosylglycinamide formyltransferase (EC 2.1.2.2)	6	3	7	7
Phosphoribosylformylglycinamidine synthase, synthetase subunit (EC 6.3.5.3)	9	7	16	7
Phosphoribosylformylglycinamidine synthase, glutamine amidotransferase subunit (EC 6.3.5.3)	2	3	6	10
Phosphoribosylformylglycinamidine synthase, PurS subunit (EC 6.3.5.3)	0	1	2	1
Phosphoribosylformylglycinamidine cyclo-ligase (EC 6.3.3.1)	6	3	15	4
Phosphoribosylaminoimidazole carboxylase catalytic subunit (EC 4.1.1.21)	4	2	10	4
Phosphoribosylaminoimidazole carboxylase ATPase subunit (EC 4.1.1.21)	7	3	13	4
Phosphoribosylaminoimidazole-succinocarboxamide synthase (EC 6.3.2.6)	7	2	12	2
Phosphoribosylaminoimidazolecarboxamide formyltransferase (EC 2.1.2.3)	0	0	0	2
IMP cyclohydrolase (EC 3.5.4.10)	0	0	0	1
Phosphoribosylaminoimidazolecarboxamide formyltransferase [alternate form]	0	1	3	0
Possible subunit variant of phosphoribosylaminoimidazolecarboxamide formyltransferase [alternate form]	0	0	2	0
YabJ, a purine regulatory protein and member of the highly conserved YjgF family	1	0	4	2
Purine nucleotide synthesis repressor	1	0	0	0
Cytosine/purine/uracil/thiamine/allantoin permease family protein	2	0	2	0
Periplasmic aromatic aldehyde oxidoreductase, FAD binding subunit YagS	1	0	7	0
Uracil-xanthine permease	0	1	0	0
Xanthine and CO dehydrogenases maturation factor, XdhC/CoxF family	4	4	9	4
Xanthine dehydrogenase iron-sulfur subunit (EC 1.17.1.4)	1	4	11	3
Xanthine dehydrogenase, FAD binding subunit (EC 1.17.1.4)	2	4	9	9
Xanthine dehydrogenase, iron-sulfur cluster and FAD-binding subunit A (1.17.1.4)	1	0	1	0
Xanthine dehydrogenase, molybdenum binding subunit (EC 1.17.1.4)	10	8	42	36
Xanthine permease	1	1	0	0
Xanthine/uracil/thiamine/ascorbate permease family protein	4	2	2	6
Nucleoside triphosphate pyrophosphohydrolase MazG	5	4	7	14
Deoxyuridine 5'-triphosphate nucleotidohydrolase (EC 3.6.1.23)	4	1	2	5
Mutator mutT protein (7,8-dihydro-8-oxoguanine-triphosphatase) (EC 3.6.1.-)	1	2	0	3
NADH pyrophosphatase (EC 3.6.1.22)	0	2	0	1
ADP-ribose pyrophosphatase (EC 3.6.1.13)	12	6	17	15
Adenosine (5')-pentaphospho-(5'')-adenosine pyrophosphohydrolase (EC 3.6.1.-)	1	0	1	0
Hypothetical nudix hydrolase YeaB	2	2	2	4
Putative Nudix hydrolase YfcD (EC 3.6.-.-)	0	1	0	1
Thiamin-phosphate pyrophosphorylase-like protein	0	0	1	0
Hydantoinase	0	0	1	1
Dihydropyrimidinase (EC 3.5.2.2)	1	3	5	5
N-carbamoyl-L-amino acid hydrolase (EC 3.5.1.87)	0	1	1	0
Beta-ureidopropionase (EC 3.5.1.6)	0	1	0	0
N-methylhydantoinase (ATP-hydrolyzing) (EC 3.5.2.14)	1	2	1	2
hydantoin racemase	0	0	1	1
Deacetylases, including yeast histone deacetylase and acetoin utilization protein	4	5	10	19
Hydantoin utilization protein A	0	0	2	0
N-methylhydantoinase B (EC 3.5.2.14)	2	0	7	2
N-methylhydantoinase A (EC 3.5.2.14)	5	2	14	3
D-hydantoinase (EC 3.5.2.2)	0	0	0	6
Ribonucleotide reductase of class Ia (aerobic), alpha subunit (EC 1.17.4.1)	6	4	2	0
Ribonucleotide reductase of class Ia (aerobic), beta subunit (EC 1.17.4.1)	2	1	3	0
Ribonucleotide reductase of class Ib (aerobic), alpha subunit (EC 1.17.4.1)	0	0	1	0
Ribonucleotide reductase of class II (coenzyme B12-dependent) (EC 1.17.4.1)	16	20	32	30
Ribonucleotide reductase of class III (anaerobic), large subunit (EC 1.17.4.2)	7	0	13	18
Ribonucleotide reductase of class III (anaerobic), activating protein (EC 1.97.1.4)	1	0	3	2
Ribonucleotide reductase transcriptional regulator NrdR	2	3	4	6
Aspartate carbamoyltransferase (EC 2.1.3.2)	9	7	16	12
Aspartate carbamoyltransferase regulatory chain (PyrI)	0	0	6	0
Carbamoyl-phosphate synthase large chain (EC 6.3.5.5)	24	29	34	17
Carbamoyl-phosphate synthase small chain (EC 6.3.5.5)	14	6	5	4
Dihydroorotase (EC 3.5.2.3)	9	6	25	7
Dihydroorotate dehydrogenase (EC 1.3.3.1)	4	4	3	2
Dihydroorotate dehydrogenase electron transfer subunit (EC 1.3.3.1)	3	1	11	12
Dihydroorotate dehydrogenase, catalytic subunit (EC 1.3.3.1)	1	7	6	12
Orotate phosphoribosyltransferase (EC 2.4.2.10)	4	4	7	8
Orotidine 5'-phosphate decarboxylase (EC 4.1.1.23)	6	5	10	12
Pyrimidine operon regulatory protein PyrR	7	2	5	2
Uracil permease	0	1	0	0
Uracil phosphoribosyltransferase (EC 2.4.2.9)	0	4	0	2
Dihydropyrimidine dehydrogenase [NADP+] (EC 1.3.1.2)	0	1	2	0
Possible hydrolase or acyltransferase RutD in novel pyrimidine catabolism pathway	0	2	1	0
Possible pyrimidine permease in reductive pathway	1	0	0	0
Pyridine nucleotide-disulphide oxidoreductase associated with reductive pyrimidine catabolism	1	1	3	0
Pyrimidine ABC transporter, ATP-binding protein	1	0	0	0
Pyrimidine ABC transporter, substrate-binding component	1	0	0	0
Pyrimidine ABC transporter, transmembrane component 2	0	0	1	0
AMP phosphohydrolase	0	0	1	0
Alkyl hydroperoxide reductase subunit C-like protein	6	10	15	15
Ferric uptake regulation protein	1	0	0	2
Ferric uptake regulation protein FUR	3	2	9	11
Fumarate and nitrate reduction regulatory protein	0	0	1	0
Hydrogen peroxide-inducible genes activator	2	4	3	0
Iron-responsive regulator Irr	1	0	0	0
Manganese superoxide dismutase (EC 1.15.1.1)	2	4	8	0
Nitrite-sensitive transcriptional repressor NsrR	0	0	1	0
Non-specific DNA-binding protein Dps	1	2	1	0
Organic hydroperoxide resistance protein	0	0	1	0
Organic hydroperoxide resistance transcriptional regulator	1	0	0	1
Paraquat-inducible protein A	0	2	0	0
Paraquat-inducible protein B	0	3	2	0
Peroxide stress regulator	1	0	0	2
Peroxide stress regulator PerR, FUR family	2	4	2	4
Phytochrome, two-component sensor histidine kinase (EC 2.7.3.-)	1	8	12	9
Probable peroxiredoxin (EC 1.11.1.15)	1	3	0	3
Redox-sensitive transcriptional regulator (AT-rich DNA-binding protein)	2	3	1	1
Rubrerythrin	6	4	10	24
Superoxide dismutase [Cu-Zn] precursor (EC 1.15.1.1)	0	0	2	0
Superoxide dismutase [Fe] (EC 1.15.1.1)	0	2	2	0
Superoxide dismutase [Mn] (EC 1.15.1.1)	2	0	7	3
Superoxide reductase (EC 1.15.1.2)	1	0	3	4
Transcriptional regulator, Crp/Fnr family	8	8	19	6
Transcriptional regulator, FUR family	0	1	2	1
Zinc uptake regulation protein ZUR	0	1	1	1
Rubredoxin	1	0	3	11
rubredoxin-oxygen oxidoreductase	1	2	4	6
Rubredoxin-NAD(+) reductase (EC 1.18.1.1)	1	1	1	0
Hypothetical protein i Rubrerythrin cluster	1	0	1	0
Fe-S oxidoreductase-like protein in Rubrerythrin cluster	1	4	0	0
Gamma-glutamyltranspeptidase (EC 2.3.2.2)	14	8	20	2
Glutamate--cysteine ligase (EC 6.3.2.2)	1	0	1	0
Glutamate--cysteine ligase (EC 6.3.2.2), divergent, of Alpha- and Beta-proteobacteria type	1	0	3	0
Glutathione synthetase (EC 6.3.2.3)	1	2	3	0
Similar to 5-oxoprolinase (EC 3.5.2.9) and Methylhydantoinases A, B (EC 3.5.2.14), contradiction in experimental data (see Annotation)	0	2	1	0
Glyceraldehyde-3-phosphate dehydrogenase (EC 1.2.1.12) (GAPDH)	0	0	0	1
NAD-dependent deacetylase	0	0	4	2
Nicotinamidase (EC 3.5.1.19)	3	6	6	6
Nicotinate phosphoribosyltransferase (EC 2.4.2.11)	8	6	15	11
Glutathione peroxidase (EC 1.11.1.9)	0	2	0	0
Glutaredoxin 2	1	0	0	0
Glutaredoxin 3	0	0	2	0
Glutaredoxin	4	3	8	6
Acetyl-CoA:Cys-GlcN-Ins acetyltransferase, mycothiol synthase MshD	0	0	1	0
Glycosyltransferase MshA involved in mycothiol biosynthesis (EC 2.4.1.-)	2	3	3	11
Mycothiol S-conjugate amidase Mca	0	0	1	0
N-acetyl-1-D-myo-inosityl-2-amino-2-deoxy-alpha-D-glucopyranoside deacetylase MshB	0	2	0	2
Glutaredoxin-related protein	2	2	5	6
Glutathione S-transferase (EC 2.5.1.18)	2	4	0	0
Glutathione S-transferase family protein	1	2	2	0
Glutathione S-transferase, omega (EC 2.5.1.18)	0	1	0	0
SAM-dependent methyltransferase 2, in cluster with Hydroxyacylglutathione hydrolase (EC 3.1.2.6)	1	0	0	0
Similar to Hydroxyacylglutathione hydrolase, but in an organism lacking glutathione biosynthesis	3	1	2	1
Nitric-oxide reductase (EC 1.7.99.7), quinol-dependent	0	1	2	0
D-tyrosyl-tRNA(Tyr) deacylase	1	3	7	9
S-(hydroxymethyl)glutathione dehydrogenase (EC 1.1.1.284)	0	1	0	0
S-formylglutathione hydrolase (EC 3.1.2.12)	0	2	0	0
Glycine N-methyltransferase (EC 2.1.1.20)	0	0	1	0
Betaine aldehyde dehydrogenase (EC 1.2.1.8)	2	0	2	2
Choline dehydrogenase (EC 1.1.99.1)	1	4	0	0
Choline-sulfatase (EC 3.1.6.6)	5	8	16	2
Glycine betaine ABC transport system, ATP-binding protein OpuAA (EC 3.6.3.32)	0	0	0	1
Glycine betaine ABC transport system, permease protein OpuAB	0	1	0	0
Glycine betaine transporter OpuD	0	1	0	0
HTH-type transcriptional regulator BetI	1	0	0	0
Sarcosine oxidase alpha subunit (EC 1.5.3.1)	3	2	7	14
Sarcosine oxidase beta subunit (EC 1.5.3.1)	1	2	5	6
Universal stress protein A	0	0	1	0
Universal stress protein family	7	5	10	9
Putative SigmaB asociated two-component system sensor protein	0	0	1	0
RNA polymerase sigma factor SigB	1	0	1	1
RsbR, positive regulator of sigma-B	9	2	7	19
Serine phosphatase RsbU, regulator of sigma subunit	23	39	27	96
Serine-protein kinase rsbW (EC 2.7.11.1)	1	3	2	4
anti sigma b factor antagonist RsbV	3	7	1	2
anti-sigma B factor RsbT	2	3	2	3
Chaperone protein DnaJ	17	7	26	22
Chaperone protein DnaK	24	20	36	38
FIG009886: phosphoesterase	1	0	0	0
Heat shock protein GrpE	3	3	6	6
Heat-inducible transcription repressor HrcA	7	5	15	14
HspR, transcriptional repressor of DnaK operon	1	1	1	1
Hypothetical radical SAM family enzyme, NOT coproporphyrinogen III oxidase, oxygen-independent	1	0	0	0
MiaB family protein, possibly involved in tRNA or rRNA modification	8	5	8	10
Nucleoside 5-triphosphatase RdgB (dHAPTP, dITP, XTP-specific) (EC 3.6.1.15)	5	3	12	8
Putative coproporphyrinogen III oxidase of BS HemN-type, oxygen-independent (EC 1.3.99.22), in heat shock gene cluster	4	4	1	7
RNA polymerase sigma factor RpoH	0	2	1	0
Radical SAM family enzyme, similar to coproporphyrinogen III oxidase, oxygen-independent, clustered with nucleoside-triphosphatase RdgB	1	1	0	0
Ribonuclease PH (EC 2.7.7.56)	4	2	7	12
Ribosomal RNA small subunit methyltransferase E (EC 2.1.1.-)	5	4	4	2
Ribosomal protein L11 methyltransferase (EC 2.1.1.-)	1	5	7	3
Ribosome-associated heat shock protein implicated in the recycling of the 50S subunit (S4 paralog)	0	1	0	0
Signal peptidase-like protein	3	0	4	12
Translation elongation factor LepA	5	6	8	18
Xanthosine/inosine triphosphate pyrophosphatase	0	1	1	0
tmRNA-binding protein SmpB	6	3	5	12
RNA-binding protein Hfq	1	0	1	0
GTP-binding protein HflX	6	7	17	19
HflK protein	1	3	2	1
HflC protein	2	0	2	0
Glutamate decarboxylase (EC 4.1.1.15)	0	0	0	2
Biosynthetic arginine decarboxylase (EC 4.1.1.19)	1	1	3	0
Ornithine aminotransferase (EC 2.6.1.13)	1	3	5	17
Cyanoglobin	1	0	0	0
Hemoglobin-like protein HbO	0	0	0	1
Protein containing plastocyanin/azurin family domain	0	1	0	0
Putative bacterial haemoglobin	0	1	0	0
diguanylate cyclase/phosphodiesterase (GGDEF & EAL domains) with PAS/PAC sensor(s)	7	7	10	7
ATP-dependent Clp protease proteolytic subunit (EC 3.4.21.92)	4	5	17	11
ATP-dependent Clp protease ATP-binding subunit ClpX	11	6	5	7
ATP-dependent Clp protease adaptor protein ClpS	2	2	3	0
ATP-dependent Clp protease ATP-binding subunit ClpA	14	12	25	28
ATP-dependent Clp protease, ATP-binding subunit ClpC	3	8	25	37
ATP-dependent hsl protease ATP-binding subunit HslU	5	6	19	15
ATP-dependent protease HslV (EC 3.4.25.-)	1	2	9	1
ClpB protein	16	21	30	39
Nucleotide excision repair protein, with UvrB/UvrC motif	0	2	0	0
ATP-dependent protease La (EC 3.4.21.53)	0	3	5	4
ATP-dependent protease La (EC 3.4.21.53) Type I	27	16	47	26
ATP-dependent protease La (EC 3.4.21.53) Type II	17	4	37	21
ClpXP protease specificity-enhancing factor	1	0	2	0
Outer membrane stress sensor protease DegS	1	3	9	3
Outer membrane stress sensor protease DegQ, serine protease	0	0	4	2
ATP-dependent protease LonB-like Type I	0	0	4	0
Site-specific tyrosine recombinase	6	3	4	6
Uncharacterized protein, similar to the N-terminal domain of Lon protease	0	2	1	0
Proteasome subunit alpha (EC 3.4.25.1), archaeal	0	0	1	1
Proteasome subunit beta (EC 3.4.25.1), archaeal	1	0	2	0
Proteasome-activating AAA-ATPase (PAN), archaeal	0	1	1	1
Proteasome subunit beta (EC 3.4.25.1), bacterial	1	0	5	0
Bacterial proteasome-activating AAA-ATPase (PAN)	1	0	8	1
Pup ligase PafA' paralog, possible component of postulated heterodimer PafA-PafA'	1	0	12	0
Aminopeptidase C (EC 3.4.22.40)	0	1	1	1
Aminopeptidase YpdF (MP-, MA-, MS-, AP-, NP- specific)	4	8	22	26
Arginine-tRNA-protein transferase (EC 2.3.2.8)	1	0	0	0
Asp-X dipeptidase	2	1	2	5
Deblocking aminopeptidase (EC 3.4.11.-)	3	3	8	19
Leucyl/phenylalanyl-tRNA--protein transferase (EC 2.3.2.6)	0	3	4	1
Oligopeptidase A (EC 3.4.24.70)	2	1	3	0
TldE/PmbA protein, part of proposed TldE/TldD proteolytic complex (PMID 12029038)	4	7	10	8
TldD protein, part of proposed TldE/TldD proteolytic complex (PMID 12029038)	5	7	30	15
TldE/PmbA family protein, Beta/Gamma-proteobacterial subgroup	0	0	1	0
TldD family protein, Beta/Gamma-proteobacterial subgroup	0	0	0	3
TldE/PmbA family protein, Actinobacterial subgroup	0	2	4	6
TldD family protein, Actinobacterial subgroup	0	3	7	15
TldD-domain protein	1	0	2	5
Eukaryotic translation initiation factor 2 alpha subunit	0	0	2	0
Eukaryotic translation initiation factor 2 beta subunit	0	0	1	1
Eukaryotic translation initiation factor 2 gamma subunit	0	0	4	1
Eukaryotic translation initiation factor 5A	0	0	0	1
Eukaryotic translation initiation factor 6	0	0	2	0
Translation initiation factor 1A	0	0	0	2
Translation initiation factor 2	9	14	27	28
Translation initiation factor 2B alpha/beta/delta-type subunit	0	0	0	1
Translation initiation factor SUI1-related protein	0	0	1	1
LSU ribosomal protein L10e (L16p)	1	0	3	1
LSU ribosomal protein L11e (L5p)	0	0	1	0
LSU ribosomal protein L12a (P1/P2)	0	0	1	0
LSU ribosomal protein L12e (L11p)	0	0	2	0
LSU ribosomal protein L13Ae (L13p)	0	0	3	0
LSU ribosomal protein L13e	0	0	1	0
LSU ribosomal protein L15e	0	0	2	1
LSU ribosomal protein L19e	0	0	1	0
LSU ribosomal protein L1e (L4p)	0	0	1	1
LSU ribosomal protein L21e	0	0	0	2
LSU ribosomal protein L23e (L14p)	0	0	2	1
LSU ribosomal protein L26e (L24p)	0	0	1	0
LSU ribosomal protein L27Ae (L15p)	0	0	1	1
LSU ribosomal protein L31e	0	0	0	1
LSU ribosomal protein L37Ae	0	0	1	2
LSU ribosomal protein L3e (L3p)	0	0	3	2
LSU ribosomal protein L40e	0	0	0	1
LSU ribosomal protein L5e (L18p)	0	0	1	1
LSU ribosomal protein L7e (L30p)	0	0	0	2
LSU ribosomal protein L8e (L2p)	0	0	0	1
LSU ribosomal protein L9e (L6p)	0	0	0	1
LSU ribosomal protein P0 (L10p)	0	0	1	0
SSU ribosomal protein S13e (S15p)	0	0	0	2
SSU ribosomal protein S14e (S11p)	0	0	0	2
SSU ribosomal protein S15Ae (S8p)	0	0	1	1
SSU ribosomal protein S15e (S19p)	2	0	0	1
SSU ribosomal protein S16e (S9p)	0	0	2	0
SSU ribosomal protein S17e	0	1	0	1
SSU ribosomal protein S18e (S13p)	0	0	1	1
SSU ribosomal protein S19e	1	0	2	0
SSU ribosomal protein S20e (S10p)	0	0	0	1
SSU ribosomal protein S23e (S12p)	0	1	0	0
SSU ribosomal protein S27Ae	1	0	0	1
SSU ribosomal protein S27e	0	0	0	1
SSU ribosomal protein S2e (S5p)	0	0	0	1
SSU ribosomal protein S3Ae	0	0	2	0
SSU ribosomal protein S3e (S3p)	0	0	2	2
SSU ribosomal protein S4e	0	0	2	0
SSU ribosomal protein S5e (S7p)	0	0	1	0
SSU ribosomal protein S8e	0	1	1	0
SSU ribosomal protein S9e (S4p)	0	0	0	2
Ribosome hibernation protein YhbH	0	0	1	1
Ribosomal subunit interface protein	3	2	5	6
LSU ribosomal protein L1p (L10Ae)	7	0	14	7
LSU ribosomal protein L2p (L8e)	4	4	9	15
LSU ribosomal protein L3p (L3e)	7	1	17	12
LSU ribosomal protein L4p (L1e)	8	4	7	14
LSU ribosomal protein L5p (L11e)	2	7	7	6
LSU ribosomal protein L6p (L9e)	2	7	4	8
LSU ribosomal protein L9p	7	4	2	8
LSU ribosomal protein L10p (P0)	4	2	11	10
LSU ribosomal protein L11p (L12e)	4	1	11	9
LSU ribosomal protein L13p (L13Ae)	2	0	12	12
LSU ribosomal protein L14p (L23e)	1	4	3	5
LSU ribosomal protein L15p (L27Ae)	7	2	8	12
LSU ribosomal protein L16p (L10e)	5	4	5	8
LSU ribosomal protein L17p	2	3	14	7
LSU ribosomal protein L18p (L5e)	0	1	6	4
LSU ribosomal protein L19p	5	3	9	6
LSU ribosomal protein L20p	8	5	8	10
LSU ribosomal protein L21p	3	4	9	4
LSU ribosomal protein L22p (L17e)	2	2	5	3
LSU ribosomal protein L23p (L23Ae)	5	2	2	9
LSU ribosomal protein L24p (L26e)	6	2	5	5
LSU ribosomal protein L25p	5	3	8	6
LSU ribosomal protein L27p	2	2	6	5
LSU ribosomal protein L28p	2	3	8	10
LSU ribosomal protein L30p (L7e)	1	0	2	1
LSU ribosomal protein L31p	0	3	7	5
LSU ribosomal protein L32p	0	1	3	3
LSU ribosomal protein L33p	0	2	3	3
LSU ribosomal protein L34p	2	4	3	0
LSU ribosomal protein L35p	1	1	2	0
Peptide chain release factor 2	5	4	13	9
Translation elongation factor 1 alpha subunit	0	0	3	3
Translation elongation factor 1 beta subunit	0	0	2	1
Translation elongation factor 2	1	0	4	4
Translation elongation factor P	6	6	15	8
Ribosomal-protein-S5p-alanine acetyltransferase	0	5	5	3
Ribosomal protein S6 glutaminyl transferase	1	0	1	1
Ribosomal-protein-S18p-alanine acetyltransferase (EC 2.3.1.-)	5	6	18	14
Inactive homolog of metal-dependent proteases, putative molecular chaperone	4	5	7	5
Ribosomal-protein-L7p-serine acetyltransferase	0	1	0	0
16S rRNA processing protein RimM	2	2	0	4
tRNA (Guanine37-N1) -methyltransferase (EC 2.1.1.31)	2	5	9	16
Ribosomal large subunit pseudouridine synthase A (EC 4.2.1.70)	0	1	0	0
Ribosomal large subunit pseudouridine synthase C (EC 4.2.1.70)	1	3	2	0
Ribosomal large subunit pseudouridine synthase D (EC 4.2.1.70)	10	12	18	13
RNA pseudouridylate synthase, group 1	0	1	0	0
LSU m3Psi1915 methyltransferase RlmH	1	2	1	0
LSU m5C1962 methyltransferase RlmI	8	3	7	24
Dimethyladenosine transferase (EC 2.1.1.-)	4	5	13	10
Glutaminyl-tRNA synthetase (EC 6.1.1.18)	3	8	17	9
Glutamyl-tRNA synthetase (EC 6.1.1.17)	6	4	9	7
50S ribosomal subunit maturation GTPase RbgA (B. subtilis YlqF)	0	1	0	0
COG0536: GTP-binding protein Obg	7	6	15	13
GTP-binding and nucleic acid-binding protein YchF	6	14	20	13
GTP-binding protein EngA	10	7	10	8
GTP-binding protein EngB	3	1	1	1
GTP-binding protein Era	3	5	23	12
GTP-binding protein TypA/BipA	3	9	4	2
GTP-binding protein YqeH, required for biogenesis of 30S ribosome subunit	0	0	0	1
GTPase and tRNA-U34 5-formylation enzyme TrmE	3	3	7	9
Probable GTPase related to EngC	1	2	0	0
Ribosome small subunit-stimulated GTPase EngC	1	4	5	4
Signal recognition particle receptor protein FtsY (=alpha subunit) (TC 3.A.5.1.1)	2	5	15	15
Signal recognition particle, subunit Ffh SRP54 (TC 3.A.5.1.1)	8	8	28	32
Translation elongation factor G	15	13	33	23
Translation elongation factor Tu	16	14	25	28
Translation elongation factor G-related protein	7	13	21	18
SSU ribosomal protein S1p	11	14	28	36
SSU ribosomal protein S2p (SAe)	8	8	15	8
SSU ribosomal protein S3p (S3e)	4	1	4	12
SSU ribosomal protein S4p (S9e)	3	2	8	5
SSU ribosomal protein S5p (S2e)	5	6	12	4
SSU ribosomal protein S6p	2	2	3	5
SSU ribosomal protein S7p (S5e)	2	2	9	5
SSU ribosomal protein S8p (S15Ae)	0	0	6	9
SSU ribosomal protein S9p (S16e)	3	2	8	5
SSU ribosomal protein S10p (S20e)	1	3	9	8
SSU ribosomal protein S11p (S14e)	1	2	4	7
SSU ribosomal protein S12p (S23e)	3	2	9	7
SSU ribosomal protein S13p (S18e)	2	1	8	6
SSU ribosomal protein S14p (S29e)	4	0	3	6
SSU ribosomal protein S15p (S13e)	5	3	1	4
SSU ribosomal protein S16p	2	3	3	4
SSU ribosomal protein S17p (S11e)	2	6	4	0
SSU ribosomal protein S18p	2	2	3	6
SSU ribosomal protein S19p (S15e)	4	3	6	9
SSU ribosomal protein S20p	4	1	3	4
SSU ribosomal protein S21p	5	1	2	1
Asparaginyl-tRNA synthetase (EC 6.1.1.22)	3	5	27	27
Aspartyl-tRNA synthetase (EC 6.1.1.12)	11	3	21	16
Thermosome subunit	0	1	13	4
Thiol:disulfide interchange protein DsbC	1	1	0	0
DnaJ-class molecular chaperone CbpA	1	3	8	2
Chaperone protein HscA	2	1	0	0
Chaperone protein HscB	0	1	0	0
Chaperone protein HtpG	4	4	4	4
Peptidyl-prolyl cis-trans isomerase ppiA precursor (EC 5.2.1.8)	0	3	1	0
Peptidyl-prolyl cis-trans isomerase ppiB (EC 5.2.1.8)	0	1	2	0
Peptidyl-prolyl cis-trans isomerase ppiD (EC 5.2.1.8)	3	1	13	5
Survival protein SurA precursor (Peptidyl-prolyl cis-trans isomerase SurA) (EC 5.2.1.8)	0	5	5	2
FKBP-type peptidyl-prolyl cis-trans isomerase SlyD (EC 5.2.1.8)	3	2	0	2
FKBP-type peptidyl-prolyl cis-trans isomerase FkpA precursor (EC 5.2.1.8)	2	0	1	0
FKBP-type peptidyl-prolyl cis-trans isomerase fklB (EC 5.2.1.8)	0	0	1	0
Foldase protein PrsA precursor (EC 5.2.1.8)	3	7	11	16
Heat shock protein 60 family chaperone GroEL	12	16	33	24
Heat shock protein 60 family co-chaperone GroES	6	1	3	6
UDP-N-acetylglucosamine 4,6-dehydratase (EC 4.2.1.-)	5	7	5	12
4-keto-6-deoxy-N-Acetyl-D-hexosaminyl-(Lipid carrier) aminotransferase	3	3	7	12
4-amino-6-deoxy-N-Acetyl-D-hexosaminyl-(Lipid carrier) acetyltrasferase	0	0	1	1
Lipid carrier : UDP-N-acetylgalactosaminyltransferase (EC 2.4.1.-)	2	3	5	9
Alpha-1,3-N-acetylgalactosamine transferase PglA (EC 2.4.1.-)	1	1	5	0
Alpha-1,4-N-acetylgalactosamine transferase PglH (EC 2.4.1.-)	2	0	1	1
Alpha-1,4-N-acetylgalactosamine transferase PglJ (EC 2.4.1.-)	1	0	7	4
Glycosyltransferase PglI (EC 2.4.1.-)	0	2	0	0
Phospholipid-lipopolysaccharide ABC transporter	2	1	1	2
Lipoprotein signal peptidase (EC 3.4.23.36)	3	7	4	2
Ribosomal protein S12p Asp88 (E. coli) methylthiotransferase	4	8	10	15
tRNA-i(6)A37 methylthiotransferase	4	14	29	21
intein-containing	6	9	34	20
Carboxy-terminal intein-mediated trans-splice	1	0	2	1
Betaine reductase component B alpha subunit (EC 1.21.4.4)	1	0	1	0
Glycine/sarcosine/betaine reductase component C chain 1	0	0	2	0
Thioredoxin	13	20	19	17
Thioredoxin reductase (EC 1.8.1.9)	11	12	22	22
L-seryl-tRNA(Sec) selenium transferase (EC 2.9.1.1)	2	3	8	8
Selenide,water dikinase (EC 2.7.9.3)	0	1	2	0
Selenocysteine-specific translation elongation factor	6	7	15	15
Selenophosphate-dependent tRNA 2-selenouridine synthase	1	0	1	0
selenocysteine-containing	13	12	30	39
ABC-type protease exporter, membrane fusion protein (MFP) family component PrtE/AprE	0	1	0	0
3',5'-cyclic-nucleotide phosphodiesterase (EC 3.1.4.17)	1	2	2	2
Adenylate cyclase (EC 4.6.1.1)	36	54	41	59
Adenylate/guanylate cyclase (EC 4.6.1.2)	2	2	3	9
CAMP phosphodiesterases class-II:Metallo-beta-lactamase superfamily	1	0	2	1
Hydrolase, alpha/beta fold family functionally coupled to Phosphoribulokinase	1	0	0	0
Predicted signal-transduction protein containing cAMP-binding and CBS domains	4	5	8	3
Prophage Clp protease-like protein	0	2	0	0
Putative Heme-regulated two-component response regulator	1	0	0	0
Putative hemin-binding lipoprotein	0	0	0	1
cAMP-binding proteins - catabolite gene activator and regulatory subunit of cAMP-dependent protein kinases	2	5	21	19
cyclolysin secretion ATP-binding protein	1	1	0	0
Autolysis histidine kinase LytS	1	1	1	4
Autolysis response regulater LytR	0	0	0	2
LrgA-associated membrane protein LrgB	2	0	1	0
Cytidine deaminase (EC 3.5.4.5)	3	1	4	11
Preprotein translocase subunit SecG (TC 3.A.5.1.1)	2	0	2	0
Programmed cell death antitoxin MazE	0	0	1	0
Programmed cell death toxin MazF	0	2	1	0
Programmed cell death antitoxin YdcD	0	1	0	0
Programmed cell death toxin YdcE	0	0	6	1
Autoinducer 2 (AI-2) kinase LsrK (EC 2.7.1.-)	0	0	0	2
Autoinducer 2 (AI-2) ABC transport system, periplasmic AI-2 binding protein LsrB	0	0	1	0
Autoinducer 2 (AI-2) aldolase LsrF (EC 4.2.1.-)	0	0	1	1
Autoinducer 2 (AI-2) modifying protein LsrG	0	2	2	0
Autoinducer 2-binding periplasmic protein LuxP precursor	0	0	0	1
S-adenosylmethionine synthetase (EC 2.5.1.6)	7	9	19	6
Polysaccharide intercellular adhesin (PIA) biosynthesis N-glycosyltransferase IcaA (EC 2.4.-.-)	1	0	1	0
Transcriptional regulator RhlR	0	1	0	0
BarA-associated response regulator UvrY (= GacA = SirA)	1	1	1	0
Alpha-2-macroglobulin, protease inhibitor I39.001	2	1	4	20
Transcriptional (co)regulator CytR	2	3	4	12
GTP pyrophosphokinase (EC 2.7.6.5), (p)ppGpp synthetase I	7	3	10	16
GTP pyrophosphokinase (EC 2.7.6.5), (p)ppGpp synthetase II	11	3	11	2
Heme oxygenase (EC 1.14.99.3)	0	0	1	0
Alkanesulfonate utilization operon LysR-family regulator CbI	0	0	1	0
Aromatic hydrocarbon utilization transcriptional regulator CatR (LysR family)	1	1	0	0
Cyn operon transcriptional activator	0	1	0	0
Cys regulon transcriptional activator CysB	4	0	7	0
GltC, transcription activator of glutamate synthase operon	0	1	0	0
Two-component system response regulator	7	24	12	20
Two-component system histidine kinase	2	0	2	3
Signal transduction histidine kinase CheA (EC 2.7.3.-)	12	11	8	15
Positive regulator of CheA protein activity (CheW)	6	6	1	2
Chemotaxis regulator - transmits chemoreceptor signals to flagelllar motor components CheY	9	7	5	18
Putative two-component sensor histidine kinase	2	3	4	8
Putative two-component response regulator	3	3	1	4
Heptaprenyl diphosphate synthase component I (EC 2.5.1.30)	1	0	5	3
Heptaprenyl diphosphate synthase component II (EC 2.5.1.30)	2	1	3	2
Hypothetical similar to thiamin biosynthesis lipoprotein ApbE	1	2	12	4
Membrane-associated zinc metalloprotease	9	7	16	8
Copper sensory histidine kinase CusS	0	0	0	2
Copper-sensing two-component system response regulator CpxR	0	0	2	0
Glycine cleavage system transcriptional activator	1	0	0	0
Glycine cleavage system transcriptional antiactivator GcvR	1	0	0	0
Putative sensory histidine kinase YfhA	1	1	2	0
Putative two-component system response regulator YedW	0	1	0	0
Sensor protein basS/pmrB (EC 2.7.3.-)	0	1	0	0
Sensory histidine kinase AtoS	1	5	4	7
Sensory histidine kinase QseC	1	2	0	0
Two-component nitrogen fixation transcriptional regulator FixJ	0	1	0	0
Two-component oxygen-sensor histidine kinase FixL	1	2	2	0
Two-component sensor histidine kinase PleC	0	0	1	2
Two-component system response regulator QseB	1	2	0	1
Outer membrane protein GumB, involved in the export of xanthan	0	2	0	0
Xanthan biosynthesis chain length determinant protein GumC	1	1	5	1
Glucose-1-phosphate thymidylyltransferase (EC 2.7.7.24)	17	11	28	36
dTDP-glucose 4,6-dehydratase (EC 4.2.1.46)	13	12	28	39
dTDP-4-dehydrorhamnose 3,5-epimerase (EC 5.1.3.13)	5	2	6	3
dTDP-4-dehydrorhamnose reductase (EC 1.1.1.133)	7	8	3	12
dTDP-Rha:A-D-GlcNAc-diphosphoryl polyprenol, A-3-L-rhamnosyl transferase WbbL	7	7	11	26
Glucose-1-phosphate cytidylyltransferase (EC 2.7.7.33)	1	2	1	0
Alginate lyase precursor (EC 4.2.2.3)	0	1	0	0
GDP-mannose 6-dehydrogenase (EC 1.1.1.132)	2	0	3	0
Probable poly(beta-D-mannuronate) O-acetylase (EC 2.3.1.-)	0	4	0	0
RNA polymerase sigma-H factor AlgT	0	1	1	0
poly(beta-D-mannuronate) lyase (EC 4.2.2.3)	0	0	1	1
Pseudaminic acid synthase (EC 4.1.3.-)	1	0	0	0
Pseudaminic acid biosynthesis protein PseA, possible Pse5Ac7Ac acetamidino synthase	1	2	0	0
Pseudaminic acid cytidylyltransferase (EC 2.7.7.43)	0	1	0	0
Phosphoheptose isomerase 1 (EC 5.3.1.-)	0	1	4	0
Phosphoheptose isomerase (EC 5.3.1.-)	3	2	5	4
D,D-heptose 7-phosphate kinase	1	1	6	8
D-glycero-D-manno-heptose 1,7-bisphosphate phosphatase (EC 3.1.1.-)	2	3	4	10
D-glycero-D-manno-heptose 1-phosphate guanosyltransferase	2	1	2	2
GDP-L-fucose synthetase (EC 1.1.1.271)	2	2	1	0
GDP-mannose 4,6-dehydratase (EC 4.2.1.47)	1	2	3	14
Methyltransferase, FkbM family protein	1	0	0	0
Capsular polysaccharide ABC transporter, ATP-binding protein KpsT	0	0	0	2
Capsular polysaccharide export system periplasmic protein KpsD	0	0	3	5
ABC transporter, predicted N-acetylneuraminate transport system permease protein 1	0	0	0	1
Glucosamine--fructose-6-phosphate aminotransferase [isomerizing] (EC 2.6.1.16)	4	15	29	30
Glucosamine-1-phosphate N-acetyltransferase (EC 2.3.1.157)	2	0	0	0
N-Acetylneuraminate cytidylyltransferase (EC 2.7.7.43)	2	0	1	1
N-acetylglucosamine-1-phosphate uridyltransferase (EC 2.7.7.23)	1	1	1	0
N-acetylmannosamine kinase (EC 2.7.1.60)	0	0	1	0
N-acetylmannosamine-6-phosphate 2-epimerase (EC 5.1.3.9)	0	1	0	0
N-acetylneuraminate synthase (EC 2.5.1.56)	3	5	0	0
N-acylglucosamine 2-epimerase (EC 5.1.3.8)	1	0	0	0
Phosphoglucosamine mutase (EC 5.4.2.10)	7	6	8	15
Predicted sialic acid transporter	3	2	0	0
Sialic acid transporter (permease) NanT	0	0	1	0
Sialic acid utilization regulator, RpiR family	0	0	2	1
Sialidase (EC 3.2.1.18)	0	1	3	1
TRAP-type transport system, large permease component, predicted N-acetylneuraminate transporter	0	5	3	0
TRAP-type transport system, periplasmic component, predicted N-acetylneuraminate-binding protein	0	2	2	0
TRAP-type transport system, small permease component, predicted N-acetylneuraminate transporter	0	2	0	0
UDP-N-acetylglucosamine 2-epimerase (EC 5.1.3.14)	6	6	6	10
Alpha-D-GlcNAc alpha-1,2-L-rhamnosyltransferase (EC 2.4.1.-)	0	0	2	1
Capsular polysaccharide biosynthesis/export periplasmic protein WcbA	0	0	0	1
Capsular polysaccharide export system protein KpsC	1	0	0	1
Heteropolysaccharide repeat unit export protein	0	0	4	6
Polysialic acid transport protein KpsM	0	0	0	1
Teichoic acid export ATP-binding protein TagH (EC 3.6.3.40)	1	2	4	9
capsular polysaccharide biosynthesis protein	7	14	15	19
Capsular polysaccharide synthesis enzyme Cap5B	0	0	0	1
Capsular polysaccharide synthesis enzyme Cap5F	0	1	0	0
Capsular polysaccharide synthesis enzyme Cap8C	0	0	1	0
Capsular polysaccharide synthesis enzyme Cap8D	0	1	1	0
Capsular polysaccharide synthesis enzyme Cap8E	1	1	0	0
Adenylylsulfate kinase (EC 2.7.1.25)	1	1	0	2
Pyruvate phosphate dikinase	6	7	10	16
Polysaccharide export lipoprotein Wza	0	2	0	0
Low molecular weight protein-tyrosine-phosphatase Wzb (EC 3.1.3.48)	0	0	1	0
Tyrosine-protein kinase Wzc (EC 2.7.10.2)	9	9	12	28
Colanic acid biosynthesis glycosyl transferase WcaE	0	1	0	1
Colanic acid biosysnthesis glycosyl transferase WcaI	1	0	0	0
Colanic acid biosynthsis UDP-glucose lipid carrier transferase WcaJ	1	0	0	4
Lipopolysaccharide biosynthesis protein WzxC	2	3	6	7
Colanic acid biosysnthesis protein WcaK	1	0	1	0
Colanic acid biosynthesis glycosyl transferase WcaL	0	1	5	2
D-glycero-beta-D-manno-heptose 7-phosphate kinase	4	8	5	8
ADP-L-glycero-D-manno-heptose-6-epimerase (EC 5.1.3.20)	0	1	0	1
3-deoxy-D-manno-octulosonic-acid transferase (EC 2.-.-.-)	6	1	5	1
Lipopolysaccharide heptosyltransferase I (EC 2.4.1.-)	2	0	3	2
ADP-heptose--lipooligosaccharide heptosyltransferase II (EC 2.4.1.-)	4	8	5	4
Lipopolysaccharide heptosyltransferase III (EC 2.4.1.-)	2	0	1	1
UDP-glucose:(heptosyl) LPS alpha1,3-glucosyltransferase WaaG (EC 2.4.1.-)	1	0	1	2
Beta-1,3-glucosyltransferase	4	1	2	3
Beta-1,4-galactosyltransferase	0	0	2	1
Lipopolysaccharide 1,2-N-acetylglucosaminetransferase (EC 2.4.1.56)	0	0	0	1
Putative two-domain glycosyltransferase	0	1	0	1
O-antigen ligase	0	0	0	4
UDP-galactopyranose mutase (EC 5.4.99.9)	1	1	0	1
Protein of unknown function DUF374	0	2	1	0
Tetraacyldisaccharide 4'-kinase (EC 2.7.1.130)	4	3	3	4
FIG043197: Inositol monophosphatase family protein	0	0	1	0
Sensor protein PhoQ (EC 2.7.13.3)	0	1	0	0
Phosphoethanolamine transferase specific for the outer Kdo residue of lipopolysaccharide	0	0	1	0
UDP-glucose dehydrogenase (EC 1.1.1.22)	17	14	27	39
Polymyxin resistance protein ArnA_FT, UDP-4-amino-4-deoxy-L-arabinose formylase (EC 2.1.2.-)	0	1	0	1
UDP-4-amino-4-deoxy-L-arabinose--oxoglutarate aminotransferase (EC 2.6.1.-)	10	8	9	15
Polymyxin resistance protein ArnC, glycosyl transferase (EC 2.4.-.-)	5	7	7	4
Polymyxin resistance protein ArnT, undecaprenyl phosphate-alpha-L-Ara4N transferase	4	4	6	0
2-Keto-3-deoxy-D-manno-octulosonate-8-phosphate synthase (EC 2.5.1.55)	3	2	5	4
3-deoxy-D-manno-octulosonate 8-phosphate phosphatase (EC 3.1.3.45)	2	1	0	0
3-deoxy-manno-octulosonate cytidylyltransferase (EC 2.7.7.38)	4	2	4	1
Acyl-[acyl-carrier-protein]--UDP-N-acetylglucosamine O-acyltransferase (EC 2.3.1.129)	6	4	2	2
Arabinose 5-phosphate isomerase (EC 5.3.1.13)	2	6	5	2
LPS-assembly lipoprotein RlpB precursor (Rare lipoprotein B)	1	0	0	0
Lipid A biosynthesis (KDO) 2-(lauroyl)-lipid IVA acyltransferase (EC 2.3.1.-)	1	0	0	0
Lipid A biosynthesis lauroyl acyltransferase (EC 2.3.1.-)	0	2	4	3
Lipid-A-disaccharide synthase (EC 2.4.1.182)	5	3	3	2
Lipopolysaccharide ABC transporter, ATP-binding protein LptB	1	0	4	3
LptA, protein essential for LPS transport across the periplasm	1	0	1	0
O-antigen flippase Wzx	1	1	0	4
Oligosaccharide repeat unit polymerase Wzy	2	0	0	2
Predicted hydrolase of the metallo-beta-lactamase superfamily, clustered with KDO2-Lipid A biosynthesis genes	0	3	1	0
Protein of unknown function DUF1009 clustered with KDO2-Lipid A biosynthesis genes	2	1	2	2
UDP-2,3-diacylglucosamine hydrolase (EC 3.6.1.-)	1	0	1	1
UDP-3-O-[3-hydroxymyristoyl] N-acetylglucosamine deacetylase (EC 3.5.1.-)	4	1	4	4
UDP-3-O-[3-hydroxymyristoyl] glucosamine N-acyltransferase (EC 2.3.1.-)	5	2	3	5
ATPase YjeE, predicted to have essential role in cell wall biosynthesis	3	4	8	7
CBS domain protein sometimes clustered with YjeE	0	0	1	2
COG3178: Predicted phosphotransferase related to Ser/Thr protein kinases	2	1	4	2
YjeF protein, function unknown	15	6	26	12
Putative N-acetylgalactosaminyl-diphosphoundecaprenol glucuronosyltransferase	0	0	2	0
Putative teichuronic acid biosynthesis glycosyl transferase TuaC	0	1	0	4
2-C-methyl-D-erythritol 4-phosphate cytidylyltransferase (EC 2.7.7.60)	2	1	6	3
N-acetylmannosaminyltransferase (EC 2.4.1.187)	4	2	8	6
Poly(glycerol-phosphate) alpha-glucosyltransferase (EC 2.4.1.52)	4	5	10	21
Teichoic acid translocation permease protein TagG	1	0	0	0
Undecaprenyl-phosphate N-acetylglucosaminyl 1-phosphate transferase (EC 2.7.8.-)	5	4	17	15
diglucosyldiacylglycerol synthase (LTA membrane anchor synthesis)	0	0	0	1
ribitol-5-phosphate cytidylyltransferase (EC 2.7.7.40)	1	0	0	1
N-acetylmuramic acid 6-phosphate etherase (EC 4.2.-.-)	1	3	6	1
UDP-N-acetylenolpyruvoylglucosamine reductase (EC 1.1.1.158)	6	3	9	15
UDP-N-acetylglucosamine 1-carboxyvinyltransferase (EC 2.5.1.7)	13	5	17	12
Acyl carrier protein	4	4	8	8
Malonyl CoA-acyl carrier protein transacylase (EC 2.3.1.39)	9	8	14	11
3-oxoacyl-[acyl-carrier-protein] synthase, KASII (EC 2.3.1.41)	18	14	21	17
3-oxoacyl-[acyl-carrier protein] reductase (EC 1.1.1.100)	21	30	48	30
Enoyl-[acyl-carrier-protein] reductase [NADH] (EC 1.3.1.9)	3	3	6	1
acyl-CoA synthetase	23	7	27	27
Phenolpthiocerol synthesis polyketide synthase ppsA	0	1	0	0
PHENOLPTHIOCEROL SYNTHESIS TYPE-I POLYKETIDE SYNTHASE PPSC	0	2	0	0
undecaprenyl-phosphate alpha-n-acetylglucosaminyltransferase	1	0	1	0
Cell division protein FtsI [Peptidoglycan synthetase] (EC 2.4.1.129)	13	21	38	30
D-alanine--D-alanine ligase (EC 6.3.2.4)	12	12	11	13
D-alanine--D-alanine ligase A (EC 6.3.2.4)	3	2	2	4
D-alanine--D-alanine ligase B (EC 6.3.2.4)	1	0	0	0
D-alanyl-D-alanine carboxypeptidase (EC 3.4.16.4)	8	6	15	3
Glutamate racemase (EC 5.1.1.3)	0	2	4	7
Glutamine synthetase type I (EC 6.3.1.2)	16	15	38	29
Glutamine synthetase type II, eukaryotic (EC 6.3.1.2)	0	1	0	0
Glutamine synthetase type III, GlnN (EC 6.3.1.2)	6	1	0	0
Membrane-bound lytic murein transglycosylase B (EC 3.2.1.-)	0	0	1	0
Membrane-bound lytic murein transglycosylase B precursor (EC 3.2.1.-)	0	0	5	0
Monofunctional biosynthetic peptidoglycan transglycosylase (EC 2.4.2.-)	2	0	2	1
Multimodular transpeptidase-transglycosylase (EC 2.4.1.129) (EC 3.4.-.-)	21	19	26	47
Murein-DD-endopeptidase (EC 3.4.99.-)	1	0	0	0
Penicillin-binding protein 2 (PBP-2)	5	9	15	15
Phospho-N-acetylmuramoyl-pentapeptide-transferase (EC 2.7.8.13)	3	3	16	15
Rare lipoprotein A precursor	2	1	2	1
Rod shape-determining protein RodA	5	1	11	15
UDP-N-acetylglucosamine--N-acetylmuramyl-(pentapeptide) pyrophosphoryl-undecaprenol N-acetylglucosamine transferase (EC 2.4.1.227)	5	5	15	12
UDP-N-acetylmuramate--alanine ligase (EC 6.3.2.8)	14	9	20	20
UDP-N-acetylmuramoylalanine--D-glutamate ligase (EC 6.3.2.9)	7	6	17	19
UDP-N-acetylmuramoylalanyl-D-glutamate--2,6-diaminopimelate ligase (EC 6.3.2.13)	9	4	14	20
O-succinylbenzoate-CoA synthase (EC 4.2.1.-)	5	1	5	6
N-acylamino acid racemase	1	0	3	1
Muconate cycloisomerase (EC 5.5.1.1)	3	4	5	2
Serine acetyltransferase (EC 2.3.1.30)	6	3	10	3
RNA polymerase sporulation specific sigma factor SigH	0	0	1	0
Lysophospholipase L2 (EC 3.1.1.5)	0	1	0	0
Archease	2	3	4	4
UPF0246 protein YaaA	2	1	0	0
Transcriptional activator protein LuxR	0	1	0	0
LuxC, acyl-CoA reductase (EC 1.2.1.50)	0	0	0	1
Cephalosporin hydroxylase	0	1	0	2
GTP-binding protein RBG1	0	0	10	9
Hydroxylamine oxidoreductase precursor (EC 1.7.3.4)	0	0	2	0
Lipid A export ATP-binding/permease protein MsbA	15	9	10	13
MFS superfamily export protein YceL	0	0	1	0
Mitochondrial processing peptidase-like protein (EC 3.4.24.64)	2	0	12	3
Na+/H+ antiporter	14	11	22	9
Peptidyl-tRNA hydrolase, archaeal type (EC 3.1.1.29)	0	0	2	1
Phage-encoded chromosome degrading nuclease YokF	0	0	1	0
Phosphocarrier protein kinase/phosphorylase, nitrogen regulation associated	0	0	5	4
Pole remodelling regulatory diguanylate cyclase	8	2	6	6
Proposed peptidoglycan lipid II flippase MurJ	12	12	19	41
Protein of unknown function DUF81	8	7	14	16
Proton/glutamate symport protein	4	1	1	0
Putative GTP-binding protien TM0445	1	3	0	1
Putative heat shock protein YegD	1	0	0	4
Putative membrane protein YfcA	0	0	1	0
Putative permease PerM (= YfgO)	0	1	0	0
Putative permease often clustered with de novo purine synthesis	7	2	2	8
Pyrrolidone-carboxylate peptidase (EC 3.4.19.3)	0	0	0	1
Quinone oxidoreductase (EC 1.6.5.5)	2	2	4	0
RNase L inhibitor	1	0	0	1
Transcription accessory protein (S1 RNA-binding domain)	2	1	0	0
Putative stomatin/prohibitin-family membrane protease subunit YbbK	1	6	10	14
Putative activity regulator of membrane protease YbbK	0	0	0	1
Putative stomatin/prohibitin-family membrane protease subunit aq_911	8	4	11	12
Putative membrane-bound ClpP-class protease associated with aq_911	9	3	19	17
Cytochrome b559 alpha chain (PsbE)	0	0	1	0
Photosystem II CP43 protein (PsbC)	0	1	0	0
Photosystem II CP47 protein (PsbB)	0	1	0	0
Photosystem II oxygen evolving complex protein PsbP	0	1	0	0
Photosystem II protein PsbK	0	1	0	0
Photosystem II stability/assembly factor HCF136/Ycf48	0	1	0	1
Putative chaperon-like protein Ycf39 for quinone binding in Photosystem II	0	2	0	0
photosystem II protein D1 (PsbA)	0	1	0	0
photosystem I P700 chlorophyll a apoprotein subunit Ia (PsaA)	0	2	0	0
photosystem I P700 chlorophyll a apoprotein subunit Ib (PsaB)	0	2	0	1
photosystem I assembly related protein Ycf4	0	1	0	0
photosystem I biogenesis protein BtpA	0	0	3	0
photosystem I subunit II (PsaD)	0	1	0	0
Light-harvesting LHI, alpha subunit	0	0	0	1
Light-harvesting LHI, beta subunit	0	1	0	0
Photosynthetic reaction center L subunit	1	0	3	3
Putative photosynthetic complex assembly protein	0	0	1	0
Phycobilisome rod linker polypeptide, phycocyanin-associated	0	2	0	0
Phycocyanobilin lyase beta subunit	0	0	0	2
Phycocyanin alpha phycocyanobilin lyase related protein NblB	0	1	0	1
RNA 3'-terminal phosphate cyclase (EC 6.5.1.4)	1	5	13	4
Protein RtcB	10	8	29	14
PAB2272 methyltransferase homolog	0	1	0	0
Fe-S OXIDOREDUCTASE (1.8.-.-) Wyeosine biosynthesis	0	0	2	1
tRNA methylase Trm12p Wyeosine biosynthesis	0	0	0	1
Iron-sulfur cluster assembly scaffold protein IscU	5	3	12	17
Hypothetical ATP-binding protein, containing DUF265 domain	1	0	6	7
Cold-shock DEAD-box protein A	1	4	1	4
ATP-dependent RNA helicase YxiN	0	0	1	0
ATP-dependent RNA helicase RhlB	1	0	0	0
ATP-dependent RNA helicase RhlE	0	3	1	2
ATP-dependent RNA helicase NGO0650	1	0	0	0
ATP-dependent RNA helicase Bcep18194_A5658	1	0	1	0
ATP-dependent RNA helicase Atu1833	1	0	0	0
ATP-dependent RNA helicase BA2475	1	0	0	0
Ribonuclease HI (EC 3.1.26.4)	1	3	4	3
Ribonuclease HI-related protein	0	0	0	1
Ribonuclease HI-related protein 3	0	1	0	0
Ribonuclease HII (EC 3.1.26.4)	6	1	9	10
Ribonuclease HIII (EC 3.1.26.4)	1	1	2	0
Ribonuclease P protein component 3 (EC 3.1.26.5)	0	0	1	0
Ribonuclease P protein component 4 (EC 3.1.26.5)	0	0	2	0
Polyribonucleotide nucleotidyltransferase (EC 2.7.7.8)	10	13	28	31
Ribonuclease III (EC 3.1.26.3)	4	4	10	8
3'-to-5' exoribonuclease RNase R	4	7	9	4
Cytoplasmic axial filament protein CafA and Ribonuclease G (EC 3.1.4.-)	5	6	10	18
FIG146085: 3'-to-5' oligoribonuclease A, Bacillus type	2	5	11	8
3'-to-5' oligoribonuclease B, Bacillus type	1	0	0	0
RNA:NAD 2'-phosphotransferase	1	0	0	3
tRNA-intron endonuclease (EC 3.1.27.9)	0	0	1	1
5-carboxymethyl uridine and 5-carboxymethyl 2-thiouridine methyltransferase	3	1	1	1
Ribonuclease BN (EC 3.1.-.-)	3	7	4	0
Ribonuclease D (EC 3.1.26.3)	1	1	3	4
Ribonuclease P protein component (EC 3.1.26.5)	1	1	2	1
Ribonuclease Z (EC 3.1.26.11)	6	3	11	13
tRNA delta(2)-isopentenylpyrophosphate transferase (EC 2.5.1.8)	6	5	18	8
tRNA pseudouridine 13 synthase (EC 4.2.1.-)	1	4	2	8
tRNA pseudouridine 55 synthase (EC 4.2.1.70)	0	0	2	1
tRNA pseudouridine synthase A (EC 4.2.1.70)	5	6	7	13
tRNA pseudouridine synthase B (EC 4.2.1.70)	5	3	4	10
tRNA(Ile)-lysidine synthetase	4	11	22	20
tRNA-specific adenosine-34 deaminase (EC 3.5.4.-)	0	2	4	8
tRNAHis-5'-guanylyltransferase	0	2	0	0
Fibrillarin	0	0	0	1
rRNA biogenesis protein Nop5/Nop56	0	0	4	1
COG2047: Uncharacterized protein (ATP-grasp superfamily)	0	0	5	1
Dihydroneopterin triphosphate pyrophosphohydolase	2	0	0	0
Dihydroneopterin triphosphate pyrophosphohydolase type 2	1	1	1	0
GTP cyclohydrolase I (EC 3.5.4.16) type 1	3	4	11	5
GTP cyclohydrolase I (EC 3.5.4.16) type 2	2	1	3	4
NADPH dependent preQ0 reductase	4	1	3	2
Peptidyl-prolyl cis-trans isomerase (EC 5.2.1.8)	5	6	6	6
Permease of the drug/metabolite transporter (DMT) superfamily	12	15	28	15
Putative preQ0 transporter	6	6	4	7
Queuosine Biosynthesis QueC ATPase	2	2	5	4
Queuosine Biosynthesis QueE Radical SAM	1	5	4	2
Queuosine biosynthesis QueD, PTPS-I	1	0	2	4
S-adenosylmethionine:tRNA ribosyltransferase-isomerase (EC 5.-.-.-)	7	0	14	18
Substrate-specific component STY3230 of queuosine-regulated ECF transporter	0	1	0	0
archaeosine tRNA-ribosyltransferase (EC 2.4.2.-) type 1	1	1	2	0
archaeosine tRNA-ribosyltransferase (EC 2.4.2.-) type 1 like	0	0	1	0
glutamyl-Q-tRNA synthetase	1	1	1	0
tRNA-guanine transglycosylase (EC 2.4.2.29)	11	8	18	14
Retron-type reverse transcriptase	5	9	5	10
Iron-sulfur cluster regulator IscR	3	0	7	8
Predicted transcriptional regulator of sulfate adenylyltransferase, Rrf2 family	0	0	1	0
Predicted transcriptional regulator of sulfate transport, Rrf2 family	0	1	0	0
Rrf2 family transcriptional regulator	3	8	1	2
Predicted transcriptional regulator of cysteine synthase, Rrf2 family	0	0	1	0
Rrf2 family transcriptional regulator, group III	0	1	0	0
RNA polymerase sigma factor RpoD	14	16	34	37
DNA-directed RNA polymerase subunit A (EC 2.7.7.6)	0	0	2	0
DNA-directed RNA polymerase subunit A' (EC 2.7.7.6)	0	1	0	0
DNA-directed RNA polymerase subunit A'' (EC 2.7.7.6)	0	1	2	1
DNA-directed RNA polymerase subunit B (EC 2.7.7.6)	0	0	4	0
DNA-directed RNA polymerase subunit B'' (EC 2.7.7.6)	0	0	0	1
DNA-directed RNA polymerase subunit B' (EC 2.7.7.6)	1	0	0	3
DNA-directed RNA polymerase subunit D (EC 2.7.7.6)	0	0	3	0
DNA-directed RNA polymerase subunit E' (EC 2.7.7.6)	0	0	2	0
DNA-directed RNA polymerase subunit F (EC 2.7.7.6)	0	0	1	0
DNA-directed RNA polymerase subunit H (EC 2.7.7.6)	0	1	2	0
DNA-directed RNA polymerase subunit N (EC 2.7.7.6)	0	0	1	1
TATA-box binding protein	1	0	1	3
Transcription initiation factor IIB	1	0	2	0
Transcription initiation factor B	0	0	1	0
Archaeal transcription factor E	0	1	1	0
RNA polymerase sigma factor RpoE	14	9	13	14
Sigma factor RpoE negative regulatory protein RseA	0	1	0	0
Sigma factor RpoE negative regulatory protein RseB precursor	0	0	2	0
Sigma factor RpoE regulatory protein RseC	0	0	1	1
Serine protease precursor MucD/AlgY associated with sigma factor RpoE	4	12	10	7
RNA polymerase sigma factor RpoH-related protein	1	0	1	0
RNA polymerase sigma-54 factor RpoN	6	7	16	12
RNA polymerase sigma factor RpoS	2	0	5	0
RNA polymerase sigma factor for flagellar operon	5	4	2	3
RNA polymerase sporulation specific sigma factor SigG	0	0	1	0
RNA polymerase sigma factor SigW	7	4	6	22
RNA polymerase sigma-70 factor	9	5	4	8
Transcription elongation factor GreA	5	6	21	17
Anti-cleavage anti-GreA transcription factor Gfh1	1	0	0	0
Transcription termination factor Rho	7	4	18	16
COG0779: clustered with transcription termination protein NusA	4	3	3	2
Transcription termination protein NusA	9	5	10	15
COG2740: Predicted nucleic-acid-binding protein implicated in transcription termination	1	1	2	0
Transcription termination protein NusB	7	3	9	5
Transcription antitermination protein NusG	1	2	7	13
Transcriptional activator RfaH	0	1	2	1
Transcription-repair coupling factor	20	18	23	29
DNA-directed RNA polymerase beta' subunit (EC 2.7.7.6)	30	20	53	52
DNA-directed RNA polymerase beta subunit (EC 2.7.7.6)	22	20	40	49
DNA-directed RNA polymerase alpha subunit (EC 2.7.7.6)	19	7	7	12
DNA-directed RNA polymerase omega subunit (EC 2.7.7.6)	0	3	1	0
DNA-directed RNA polymerase alpha subunit domain	0	2	1	0
Long-chain-fatty-acid--CoA ligase (EC 6.2.1.3)	43	48	97	85
enoyl-CoA hydratase, R-specific	0	1	0	1
Putative 3-hydroxyacyl-coa dehydrogenase	5	0	5	1
4-hydroxybenzoate transporter	2	2	9	6
Feruloyl-CoA synthetase	1	1	2	1
Phenylpropionate dioxygenase and related ring-hydroxylating dioxygenases, large terminal subunit	2	5	4	0
Protein involved in meta-pathway of phenol degradation	1	0	0	0
Vanillate O-demethylase oxygenase subunit (EC 1.14.13.82)	2	0	0	6
lignostilbene-alpha,beta-dioxygenase	1	1	0	0
Benzoate transport protein	0	2	0	0
Benzoylformate decarboxylase (EC 4.1.1.7)	2	0	0	0
Ortho-halobenzoate 1,2-dioxygenase alpha-ISP protein OhbB	0	1	0	0
benABC operon transcriptional activator BenR	0	1	0	0
benzoate dioxygenase, ferredoxin reductase component	0	1	0	0
2-hydroxy-6-oxo-6-phenylhexa-2,4-dienoate hydrolase (EC 3.7.1.-)	0	2	3	0
2-keto-4-pentenoate hydratase (EC 4.2.1.-)	0	1	0	0
4-hydroxy-2-oxovalerate aldolase (EC 4.1.3.-)	0	2	0	0
Biphenyl-2,3-diol 1,2-dioxygenase (EC 1.13.11.39)	0	0	1	0
P-hydroxybenzoate hydroxylase (EC 1.14.13.2)	0	0	2	0
AreB (Aryl-alcohol dehydrogenase) (EC 1.1.1.90)	0	0	2	0
Salicylate hydroxylase (EC 1.14.13.1)	0	0	0	1
putative facilitator of salicylate uptake	1	1	0	0
3-oxoadipate CoA-transferase subunit A (EC 2.8.3.6)	0	3	0	0
3-oxoadipate CoA-transferase subunit B (EC 2.8.3.6)	0	4	9	10
Beta-ketoadipate enol-lactone hydrolase (EC 3.1.1.24)	11	11	15	29
Beta-ketoadipyl CoA thiolase (EC 2.3.1.-)	1	0	0	0
2-hydroxychromene-2-carboxylate isomerase	0	1	0	0
4-hydroxyphenylacetate 3-monooxygenase (EC 1.14.13.3)	1	2	6	2
Aldehyde dehydrogenase (EC 1.2.1.3), PaaZ	2	1	1	1
Monoamine oxidase (1.4.3.4)	0	1	0	0
Nitrilotriacetate monooxygenase component B (EC 1.14.13.-)	0	1	2	1
2,4-dihydroxyhept-2-ene-1,7-dioic acid aldolase (EC 4.1.2.-)	2	2	1	1
2-hydroxyhepta-2,4-diene-1,7-dioate isomerase (EC 5.3.3.-)	0	0	2	0
5-carboxymethyl-2-hydroxymuconate delta-isomerase (EC 5.3.3.10)	2	1	0	1
5-carboxymethyl-2-hydroxymuconate semialdehyde dehydrogenase (EC 1.2.1.60)	2	1	0	0
Isoquinoline 1-oxidoreductase alpha subunit (EC 1.3.99.16)	1	1	2	0
Isoquinoline 1-oxidoreductase beta subunit (EC 1.3.99.16)	6	1	5	0
2-hydroxymuconic semialdehyde hydrolase (EC 3.7.1.9)	2	1	3	9
2-polyprenylphenol hydroxylase and related flavodoxin oxidoreductases	3	2	6	4
4-oxalocrotonate tautomerase (EC 5.3.2.-)	0	0	1	0
Catechol 2,3-dioxygenase (EC 1.13.11.2)	0	1	1	1
Protocatechuate 4,5-dioxygenase beta chain (EC 1.13.11.8)	0	1	0	0
3-oxoadipate enol-lactone hydrolase	0	0	5	2
Catechol 1,2-dioxygenase 1 (EC 1.13.11.1)	0	1	0	0
Muconolactone isomerase (EC 5.3.3.4),putative	0	0	1	0
mandelate racemase/muconate lactonizing enzyme family protein	6	4	3	0
4-hydroxyphenylpyruvate dioxygenase (EC 1.13.11.27)	2	0	5	3
Aromatic-amino-acid aminotransferase (EC 2.6.1.57)	1	1	0	0
Fumarylacetoacetase (EC 3.7.1.2)	3	0	3	0
Homogentisate 1,2-dioxygenase (EC 1.13.11.5)	4	1	2	1
Transcriptional regulator, IclR family	4	1	7	23
3-carboxy-cis,cis-muconate cycloisomerase (EC 5.5.1.2)	1	0	0	0
3-oxoadipate enol-lactone hydrolase/4-carboxymuconolactone decarboxylase	1	1	0	0
4-carboxymuconolactone decarboxylase (EC 4.1.1.44)	2	0	1	2
Protocatechuate 3,4-dioxygenase alpha chain (EC 1.13.11.3)	0	0	1	0
Protocatechuate 3,4-dioxygenase beta chain (EC 1.13.11.3)	0	0	3	0
Fumarylacetoacetate hydrolase family protein	2	1	3	2
Putative n-hydroxybenzoate hydroxylase	0	0	1	0
2-keto-4-pentenoate hydratase/2-oxohepta-3-ene-1,7-dioic acid hydratase (catechol pathway)	0	1	1	0
4-hydroxybenzoyl-CoA reductase, gamma subunit (EC 1.3.99.20)	0	0	0	2
4-oxalocrotonate decarboxylase (EC 4.1.1.77)	1	0	0	1
Benzoate transport related protein	0	1	2	0
Benzoate transport, ATP binding protein	0	0	1	0
Benzoate transport, ATPase component	1	0	1	0
Benzoate transport, extracellular ligand-binding receptor	0	0	3	0
Benzoate transport, inner membrane transport component	0	0	1	1
Benzoate transport, inner-membrane translocator	1	0	0	0
Benzoate-CoA ligase (EC 6.2.1.25)	2	2	2	2
Benzoyl-CoA oxygenase component B	1	1	2	0
Hydroxybenzoyl-CoA reductase subunit	0	2	0	1
Methylglutaconyl-CoA hydratase (EC 4.2.1.18)	5	2	1	2
Predicted 2-keto-4-pentenoate hydratase/2-oxohepta-3-ene-1,7-dioic acid hydratase	2	2	1	1
Putative Acyl-CoA thiolase	1	0	0	0
benzoate degradation ring-cleavage hydrolase	0	1	0	0
benzoyl-CoA-dihydrodiol lyase (BoxC)	0	1	4	0
Ethylbenzene dehydrogenase alpha subunit (EC 1.17.99.2)	6	0	1	0
Succinyl-CoA:(R)-benzylsuccinate CoA-transferase subunit BbsF (EC 2.8.3.15)	1	0	0	1
4-cresol dehydrogenase [hydroxylating] flavoprotein subunit (EC 1.17.99.1)	0	0	2	2
putative 4-hydroxybenzoyl-CoA thioesterase	0	0	1	0
Cell division protein FtsK	9	16	18	38
Metallo-beta-lactamase family protein, RNA-specific	10	11	13	9
Peptide deformylase (EC 3.5.1.88)	3	6	8	8
Transcriptional regulator in cluster with Zn-dependent hydrolase	0	1	0	0
Trk system potassium uptake protein TrkA	4	4	12	11
Zn-dependent hydrolase, RNA-metabolising, CPSF 100 kDa analog	7	3	6	11
Metal-dependent hydrolase COG0491 with rhodanese-homology domain (RHOD)	1	1	1	2
Hypothetical protein, sulfurtransferase domain	0	1	0	4
Protein of unknown function DUF156	1	2	2	6
Replicative DNA helicase (EC 3.6.1.-) [SA14-24]	10	9	9	14
Spore coat protein A	1	0	0	0
Inner spore coat protein H	0	0	1	0
YlxP-like protein	1	1	3	4
Ribosome-binding factor A	1	4	5	6
Low molecular weight protein tyrosine phosphatase (EC 3.1.3.48)	2	3	1	2
Peptide chain release factor 1	8	5	20	17
Glutamine synthetase family protein in hypothetical Actinobacterial gene cluster	1	1	2	0
Short-chain dehydrogenase/reductase in hypothetical Actinobacterial gene cluster	1	0	0	0
Twin-arginine translocation protein TatC	6	6	15	3
FIG005666: putative helicase	0	1	0	0
Twin-arginine translocation protein TatA	1	2	0	2
Cell division initiation protein DivIVA	1	1	2	1
Cell division protein BolA	1	0	2	0
Cell division protein FtsA	15	7	16	15
Cell division protein FtsH (EC 3.4.24.-)	17	15	45	28
Cell division protein FtsJ	1	3	3	1
Cell division protein FtsL	2	0	0	1
Cell division protein FtsQ	1	2	4	0
Cell division protein FtsW	14	9	10	14
Cell division protein FtsX	24	16	35	24
Cell division protein FtsZ (EC 3.4.24.-)	10	11	18	20
Cell division protein MraZ	2	3	5	6
Cell division topological specificity factor MinE	0	1	3	3
Cell division transporter, ATP-binding protein FtsE (TC 3.A.5.1.1)	11	8	45	34
Cell division trigger factor (EC 5.2.1.8)	7	5	2	5
Chromosome partitioning protein ParA	1	1	1	2
Rod shape-determining protein MreB	5	10	9	16
Rod shape-determining protein MreC	2	4	7	10
Septum formation protein Maf	2	2	6	7
Septum site-determining protein MinC	2	1	3	4
Septum site-determining protein MinD	6	3	9	2
Hemin ABC transporter, permease protein	0	0	0	1
Phosphate starvation-inducible ATPase PhoH with RNA binding motif	0	1	1	0
putative hemin permease	0	4	4	4
Putative membrane protein YeiH	0	1	1	1
LysR family transcriptional regulator YeiE	3	1	0	5
16S rRNA m(5)C 967 methyltransferase (EC 2.1.1.-)	0	1	0	0
DNA topoisomerase I (EC 5.99.1.2)	15	13	39	19
Helicase PriA essential for oriC/DnaA-independent DNA replication	8	6	19	24
Methionyl-tRNA formyltransferase (EC 2.1.2.9)	8	4	11	9
Protein serine/threonine phosphatase PrpC, regulation of stationary phase	4	4	10	3
Ribosomal RNA large subunit methyltransferase N (EC 2.1.1.-)	8	4	9	15
Ribosomal RNA small subunit methyltransferase B (EC 2.1.1.-)	5	4	10	3
Rossmann fold nucleotide-binding protein Smf possibly involved in DNA uptake	4	4	15	9
Serine/threonine protein kinase PrkC, regulator of stationary phase	8	30	18	16
Uncharacterized protein with LysM domain, COG1652	1	2	0	1
tRNA:m(5)U-54 MTase gid	10	7	2	5
Type III secretion inner membrane channel protein (LcrD,HrcV,EscV,SsaV)	1	0	0	0
Type III secretion system protein	1	0	0	0
Putative reductase (alkanesulfonate metabolism)	0	0	1	0
Alkanesulfonates-binding protein	0	0	1	0
2-aminoethylphosphonate:pyruvate aminotransferase (EC 2.6.1.37)	0	2	1	0
Phosphonoacetaldehyde hydrolase (EC 3.11.1.1)	0	0	0	1
Metal-dependent hydrolase involved in phosphonate metabolism	1	0	0	1
PhnH protein	1	0	1	0
PhnI protein	0	0	2	0
PhnJ protein	1	1	0	0
Phosphonates transport ATP-binding protein PhnK	0	0	2	0
Alkaline phosphatase synthesis transcriptional regulatory protein PhoP	0	3	5	6
Phosphate ABC transporter, periplasmic phosphate-binding protein PstS (TC 3.A.1.7.1)	11	11	23	34
Phosphate transport ATP-binding protein PstB (TC 3.A.1.7.1)	8	16	37	35
Phosphate transport system regulatory protein PhoU	8	7	10	12
1-acyl-sn-glycerol-3-phosphate acyltransferase (EC 2.3.1.51)	6	9	10	10
Alkaline phosphatase (EC 3.1.3.1)	7	8	5	5
Alkaline phosphatase like protein	2	4	5	2
Apolipoprotein N-acyltransferase (EC 2.3.1.-)	2	2	3	6
Exopolyphosphatase (EC 3.6.1.11)	3	5	3	8
FIG000233: metal-dependent hydrolase	1	4	4	3
Inorganic pyrophosphatase (EC 3.6.1.1)	5	2	0	4
Magnesium and cobalt efflux protein CorC	8	4	9	10
Manganese-dependent inorganic pyrophosphatase (EC 3.6.1.1)	0	2	0	3
NAD(P) transhydrogenase alpha subunit (EC 1.6.1.2)	5	1	17	0
NAD(P) transhydrogenase subunit beta (EC 1.6.1.2)	2	5	4	2
Na/Pi cotransporter II-related protein	0	0	1	0
Phosphatase, Ppx/GppA family	1	0	0	0
Phosphate starvation-inducible protein PhoH, predicted ATPase	8	3	15	9
Phosphate transport regulator (distant homolog of PhoU)	2	3	4	0
Phosphate-specific outer membrane porin OprP	0	2	1	0
Predicted ATPase related to phosphate starvation-inducible protein PhoH	2	2	1	3
Probable low-affinity inorganic phosphate transporter	1	6	3	4
Pyrophosphate-energized proton pump (EC 3.6.1.1)	13	8	40	27
Sodium-dependent phosphate transporter	1	4	10	10
Soluble pyridine nucleotide transhydrogenase (EC 1.6.1.1)	0	1	2	0
response regulator in two-component regulatory system with PhoQ	2	1	2	0
secreted alkaline phosphatase	0	1	2	0
Phage major capsid protein	0	0	1	0
Dihydroflavonol-4-reductase (EC 1.1.1.219)	1	0	11	6
3-phenylpropionate dioxygenase ferredoxin subunit	0	0	0	1
Chalcone synthase (EC 2.3.1.74)	0	1	0	0
clavaldehyde dehydrogenase	0	0	1	2
Phenazine biosynthesis protein PhzF	0	3	2	1
3-(3-hydroxy-phenyl)propionate hydroxylase (EC 1.14.13.-)	0	1	0	0
Probable 3-phenylpropionic acid transporter	0	1	1	2
Oxidase	0	1	0	0
Arylsulfatase (EC 3.1.6.1)	2	6	3	2
Quinolinate synthetase (EC 4.1.99.-)	2	5	14	18
Deoxyhypusine synthase	8	3	16	17
Anthranilate phosphoribosyltransferase (EC 2.4.2.18)	2	3	6	10
Phosphoribosylanthranilate isomerase (EC 5.3.1.24)	4	4	2	2
Tryptophan synthase alpha chain (EC 4.2.1.20)	2	4	8	4
Tryptophan synthase beta chain (EC 4.2.1.20)	9	6	21	6
Aromatic-L-amino-acid decarboxylase (EC 4.1.1.28)	1	2	1	5
Monoglyceride lipase (EC 3.1.1.23)	0	2	4	2
Spore germination protein GerKB	0	0	1	0
Spore protein YdhD, not involved in spore germination	0	1	0	0
Putative peptidoglycan hydrolase YvbX, NOT involved in spore germination	1	1	0	2
Uncharacterized protein YkvT, NOT involved in spore germination	0	1	0	0
Secreted and spore coat-associated protein 1, similar to biofilm matrix component TasA and to camelysin	0	0	1	0
Immune inhibitor A metalloprotease	0	1	0	0
Stage IV sporulation protein B	0	0	1	0
Sporulation initiation phosphotransferase (Spo0F)	1	0	0	4
Stage II sporulation protein D (SpoIID)	0	0	1	1
Stage V sporulation protein AD (SpoVAD)	0	0	0	1
Stage V sporulation protein AE (SpoVAE)	0	0	1	0
Stage V sporulation protein D (Sporulation-specific penicillin-binding protein)	0	0	0	1
Stage V sporulation protein E	1	3	3	0
Stage V sporulation protein involved in spore cortex synthesis (SpoVR)	1	1	1	0
Stage V sporulation protein required for dehydratation of the spore core and assembly of the coat (SpoVS)	0	1	4	6
3-dehydroquinate synthase (EC 4.2.3.4)	0	0	0	1
Anthranilate synthase, aminase component (EC 4.1.3.27)	1	0	0	0
Indole-3-glycerol phosphate synthase (EC 4.1.1.48)	2	4	7	2
Chorismate mutase I (EC 5.4.99.5)	1	0	0	0
Chorismate mutase II (EC 5.4.99.5)	0	1	0	0
Amino acid-binding ACT	1	2	4	1
Indolepyruvate ferredoxin oxidoreductase, alpha and beta subunits	3	2	1	1
Indolepyruvate oxidoreductase subunit IorA (EC 1.2.7.8)	3	4	37	24
Indolepyruvate oxidoreductase subunit IorB (EC 1.2.7.8)	0	0	9	14
Phenylacetate-coenzyme A ligase (EC 6.2.1.30)	5	4	12	11
5-oxopent-3-ene-1,2,5-tricarboxylate decarboxylase.	0	1	0	0
Kynurenine formamidase, bacterial (EC 3.5.1.9)	1	1	0	0
Phenylalanine-4-hydroxylase (EC 1.14.16.1)	1	0	1	2
Putative fumarylacetoacetate (FAA) hydrolase	0	1	0	0
Tryptophan 2,3-dioxygenase (EC 1.13.11.11)	1	1	0	0
Tryptophanase (EC 4.1.99.1)	6	12	13	13
Biosynthetic Aromatic amino acid aminotransferase beta (EC 2.6.1.57)	4	1	8	2
Isochorismate synthase (EC 5.4.4.2)	0	0	0	1
Isochorismatase (EC 3.3.2.1)	4	4	4	2
Bacilysin biosynthesis oxidoreductase BacC	1	0	0	0
Transcriptional regulator BkdR of isoleucine and valine catabolism operon	1	1	0	1
Branched-chain alpha-keto acid dehydrogenase, E1 component, alpha subunit (EC 1.2.4.4)	2	1	5	0
Branched-chain alpha-keto acid dehydrogenase, E1 component, beta subunit (EC 1.2.4.4)	1	1	8	0
Dihydrolipoamide acyltransferase component of branched-chain alpha-keto acid dehydrogenase complex (EC 2.3.1.168)	2	6	8	3
Dihydrolipoamide dehydrogenase of branched-chain alpha-keto acid dehydrogenase (EC 1.8.1.4)	0	1	6	4
Probable acyl-CoA dehydrogenase (EC 1.3.99.3)	3	0	2	1
Acyl-CoA dehydrogenase, short-chain specific (EC 1.3.99.2)	27	18	48	51
Ketoisovalerate oxidoreductase subunit VorA (EC 1.2.7.7)	0	0	4	2
Ketoisovalerate oxidoreductase subunit VorB (EC 1.2.7.7)	0	2	5	3
Ketoisovalerate oxidoreductase subunit VorC (EC 1.2.7.7)	0	0	2	0
Hydroxymethylglutaryl-CoA synthase (EC 2.3.3.10)	3	3	12	10
nonspecific lipid-transfer protein (acethyl CoA synthetase)	0	0	6	5
conserved protein associated with acetyl-CoA C-acyltransferase	3	2	16	7
Leucine dehydrogenase (EC 1.4.1.9)	1	0	7	0
Isovaleryl-CoA dehydrogenase (EC 1.3.99.10)	4	5	5	6
Biotin carboxylase of methylcrotonyl-CoA carboxylase (EC 6.3.4.14)	1	1	0	0
Hydroxymethylglutaryl-CoA lyase (EC 4.1.3.4)	7	4	5	3
Acetoacetyl-CoA synthetase (EC 6.2.1.16)	7	1	5	3
Hydroxymethylglutaryl-CoA reductase (EC 1.1.1.34)	5	4	4	10
Acetoacetyl-CoA synthetase [leucine] (EC 6.2.1.16)	0	1	1	0
2-isopropylmalate synthase (EC 2.3.3.13)	17	11	25	12
3-isopropylmalate dehydratase large subunit (EC 4.2.1.33)	8	9	9	9
3-isopropylmalate dehydratase small subunit (EC 4.2.1.33)	3	6	8	5
3-isopropylmalate dehydrogenase (EC 1.1.1.85)	6	4	8	5
Threonine dehydratase (EC 4.3.1.19)	2	1	9	5
Threonine dehydratase, catabolic (EC 4.3.1.19)	4	3	3	2
Threonine dehydratase biosynthetic (EC 4.3.1.19)	4	3	6	0
Ketol-acid reductoisomerase (EC 1.1.1.86)	3	7	5	3
Dihydroxy-acid dehydratase (EC 4.2.1.9)	13	8	19	6
(R)-citramalate synthase (EC 2.3.1.182)	6	0	7	4
Leucine-responsive regulatory protein, regulator for leucine (or lrp) regulon and high-affinity branched-chain amino acid transport system	0	0	2	0
L-2-amino-thiazoline-4-carboxylic acid hydrolase (EC 3.5.2.-)	0	0	1	0
ATP phosphoribosyltransferase (EC 2.4.2.17)	2	2	5	2
ATP phosphoribosyltransferase catalytic subunit (EC 2.4.2.17)	1	1	1	1
ATP phosphoribosyltransferase regulatory subunit (EC 2.4.2.17)	2	3	3	2
Histidinol dehydrogenase (EC 1.1.1.23)	2	11	9	6
Histidinol-phosphatase (EC 3.1.3.15)	2	0	6	11
Histidinol-phosphatase [alternative form] (EC 3.1.3.15)	0	1	2	1
Histidinol-phosphate aminotransferase (EC 2.6.1.9)	6	3	7	4
Imidazole glycerol phosphate synthase amidotransferase subunit (EC 2.4.2.-)	1	3	6	3
Imidazole glycerol phosphate synthase cyclase subunit (EC 4.1.3.-)	5	4	8	13
Imidazoleglycerol-phosphate dehydratase (EC 4.2.1.19)	4	1	4	2
Phosphoribosyl-AMP cyclohydrolase (EC 3.5.4.19)	2	0	2	0
Phosphoribosyl-ATP pyrophosphatase (EC 3.6.1.31)	0	0	2	0
Phosphoribosylformimino-5-aminoimidazole carboxamide ribotide isomerase (EC 5.3.1.16)	0	2	8	8
Histidine ammonia-lyase (EC 4.3.1.3)	5	5	8	18
Urocanate hydratase (EC 4.2.1.49)	8	2	15	14
Imidazolonepropionase (EC 3.5.2.7)	3	5	9	6
Glutamate formiminotransferase (EC 2.1.2.5)	0	1	5	9
Formiminoglutamase (EC 3.5.3.8)	1	0	0	4
N-formylglutamate deformylase (EC 3.5.1.68)	0	1	1	0
Formiminoglutamic iminohydrolase (EC 3.5.3.13)	1	0	1	0
Histidine utilization repressor	0	3	1	0
Low-specificity L-threonine aldolase (EC 4.1.2.5)	2	2	11	9
L-threonine 3-dehydrogenase (EC 1.1.1.103)	4	1	8	17
2-amino-3-ketobutyrate coenzyme A ligase (EC 2.3.1.29)	8	7	18	13
Cystathionine beta-synthase (EC 4.2.1.22)	0	3	2	1
Cystathionine gamma-lyase (EC 4.4.1.1)	5	4	2	0
Phosphoserine phosphatase (EC 3.1.3.3)	1	0	5	3
Phosphoserine aminotransferase (EC 2.6.1.52)	2	3	7	8
D-3-phosphoglycerate dehydrogenase (EC 1.1.1.95)	16	16	30	19
Seryl-tRNA synthetase (EC 6.1.1.11)	15	7	22	11
Phosphoserine aminotransferase, putative (EC 2.6.1.52)	0	0	1	0
Cysteine desulfurase (EC 2.8.1.7)	22	16	44	54
Cysteine desulfurase (EC 2.8.1.7), NifS subfamily	0	2	3	0
Cysteine desulfurase (EC 2.8.1.7), SufS subfamily	2	1	1	4
Cysteine desulfurase CsdA-CsdE (EC 2.8.1.7), main protein CsdA	0	0	1	1
Similar to Glycine cleavage system H protein	3	0	2	5
Sodium/glycine symporter GlyP	0	2	1	0
Aspartokinase (EC 2.7.2.4)	13	7	17	10
Aspartate-semialdehyde dehydrogenase (EC 1.2.1.11)	8	4	9	11
Homoserine dehydrogenase (EC 1.1.1.3)	9	3	10	13
Homoserine kinase (EC 2.7.1.39)	1	3	2	8
Predicted functional analog of homoserine kinase (EC 2.7.1.-)	3	1	5	5
Threonine synthase (EC 4.2.3.1)	13	16	40	44
Aspartate aminotransferase (EC 2.6.1.1)	15	25	47	25
Homoserine O-succinyltransferase (EC 2.3.1.46)	0	0	1	0
Homoserine O-acetyltransferase (EC 2.3.1.31)	3	3	4	2
O-acetylhomoserine sulfhydrylase (EC 2.5.1.49)	1	1	1	1
Cystathionine gamma-synthase (EC 2.5.1.48)	7	2	4	10
Cystathionine beta-lyase (EC 4.4.1.8)	1	0	2	0
5-methyltetrahydrofolate--homocysteine methyltransferase (EC 2.1.1.13)	21	15	13	9
5-methyltetrahydropteroyltriglutamate--homocysteine methyltransferase (EC 2.1.1.14)	1	2	1	2
Methionine ABC transporter ATP-binding protein	7	12	15	15
Archaeal S-adenosylmethionine synthetase (EC 2.5.1.6)	4	0	0	10
SAM-dependent methlytransferase UbiG	1	1	0	0
Adenosylhomocysteinase (EC 3.3.1.1)	5	6	27	23
Homocysteine S-methyltransferase (EC 2.1.1.10)	2	0	0	2
Transmembrane component MtsC of energizing module of methionine-regulated ECF transporter	0	0	1	4
Duplicated ATPase component MtsB of energizing module of methionine-regulated ECF transporter	1	0	2	5
Substrate-specific component MtsA of methionine-regulated ECF transporter	0	0	4	1
Cysteine synthase (EC 2.5.1.47)	6	5	17	20
Transcriptional activator MetR	1	0	0	0
Predicted regulator of methionine metabolism, ArsR family	0	0	0	1
5-aminopentanamidase (EC 3.5.1.30)	0	2	3	1
L-beta-lysine 5,6-aminomutase alpha subunit (EC 5.4.3.3)	0	0	0	1
[truncated: 1,050 more rows]
