# Supplementary material for: Taxonomic and functional characteristics of microbial communities and their correlation with physicochemical properties of four geothermal springs in Odisha, India
Source: Front Microbiol. 2015 Oct 26;6:1166. doi: 10.3389/fmicb.2015.01166 (PMC4620158; doi:10.3389/fmicb.2015.01166)
Supplement: Supplementary file 4 [file Table5.XLSX]

## Sheet: Legend
Supplementary Table 5. KEGG functional profiles (at the level of individual categories, pathways, and KEGG Orthology identifiers) generated from the MEGAN5 classification.

## Sheet: KEGG_categories
Proportion ofgenes related to different KEGG categories identified across the four hot spring samples
Classification is based on MEGAN v5.3.0
Sample ID	HT-1	TP-2	TB-3	AT-4
Carbohydrate Metabolism	13.9757	14.3745	14.4115	14.8007
Energy Metabolism	11.3232	11.3711	11.7344	11.9804
Lipid Metabolism	3.99879	3.68848	4.07812	3.30358
Nucleotide Metabolism	6.80197	5.99642	6.77083	6.40814
Amino Acid Metabolism	12.3179	12.4565	12.4271	11.5597
Metabolism of Other Amino Acids	3.52657	3.59363	3.13542	3.04202
Glycan Biosynthesis and Metabolism	2.7228	2.51871	2.47396	2.73497
Metabolism of Cofactors and Vitamins	7.01296	6.36527	6.8125	6.91988
Metabolism of Terpenoids and Polyketides	2.63237	2.83486	2.74479	2.53028
Biosynthesis of Other Secondary Metabolites	1.6377	1.46485	1.57812	1.60346
Xenobiotics Biodegradation and Metabolism	3.48639	4.04679	4.02604	3.34338
Transcription	0.823872	0.695542	0.760417	0.773298
Translation	5.05375	4.91095	6.08854	6.08404
Folding, Sorting and Degradation	2.35105	2.72948	2.97396	2.78046
Replication and Repair	4.07917	4.34187	4.34375	4.45784
Membrane Transport	5.16427	5.60649	5.57292	6.49912
Signal Transduction	4.57149	4.93203	3.31771	4.3498
Signaling Molecules and Interaction	0.0200944	0	0	0
Transport and Catabolism	0.823872	0.85362	0.817708	0.653892
Cell Motility	1.96926	1.40162	0.828125	1.26798
Cell Growth and Death	1.6176	1.52809	1.27604	1.23955
Cell Communication	0.0301417	0.0105385	0.0104167	0
Immune System	0.0301417	0.0632311	0.0260417	0.0341161
Endocrine System	0.864061	0.959005	0.822917	0.716438
Circulatory System	0.0100472	0.0316156	0.00520833	0.00568602
Digestive System	0.110519	0.158078	0.0989583	0.0796043
Excretory System	0.18085	0.221309	0.171875	0.193325
Nervous System	0.301417	0.368848	0.276042	0.261557
Sensory System	0.0100472	0.0105385	0.00520833	0
Development	0	0	0	0.00568602
Environmental Adaptation	0.452125	0.35831	0.265625	0.358219
Cancers	0.221039	0.252924	0.270833	0.159209
Immune Diseases	0.0401889	0.0843081	0.0416667	0.0739182
Neurodegenerative Diseases	0.18085	0.242386	0.192708	0.176267
Substance Dependence	0.0602833	0.0526926	0.0104167	0.0625462
Cardiovascular Diseases	0.0100472	0.0105385	0.0104167	0.011372
Endocrine and Metabolic Diseases	0.190897	0.242386	0.286458	0.238813
Infectious Diseases	1.39656	1.22247	1.33333	1.29073

## Sheet: KEGG_pathways
Proportion of genes related to different KEGG pathways identified across the four hot spring samples
Sample ID	HT-1	TP-2	TB-3	AT-4
Glycolysis / Gluconeogenesis	2.01831	1.92448	2.30631	2.42018
Citrate cycle (TCA cycle)	1.7758	1.61592	1.99399	1.72743
Pentose phosphate pathway	1.17343	1.16119	1.19319	1.37662
Pentose and glucuronate interconversions	0.40679	0.787657	0.524525	0.537324
Fructose and mannose metabolism	1.05609	1.07186	0.860861	1.10573
Galactose metabolism	0.805758	0.755177	0.820821	0.981393
Ascorbate and aldarate metabolism	0.195572	0.308567	0.204204	0.195391
Starch and sucrose metabolism	1.28295	1.33983	1.06507	1.5054
Amino sugar and nucleotide sugar metabolism	1.76797	1.689	1.62162	2.03384
Pyruvate metabolism	2.08089	2.15185	2.51051	2.34913
Glyoxylate and dicarboxylate metabolism	1.6741	1.54283	1.54555	1.67414
Propanoate metabolism	1.47853	1.53471	1.92192	1.78516
Butanoate metabolism	1.5724	1.58343	1.79379	1.46099
C5-Branched dibasic acid metabolism	0.40679	0.341048	0.312312	0.337493
Inositol phosphate metabolism	0.24251	0.203004	0.288288	0.279764
Oxidative phosphorylation	2.46421	2.43605	1.68969	1.85177
Photosynthesis	0.367676	0.430369	0.164164	0.364137
Photosynthesis - antenna proteins	0	0.0324807	0	0
Carbon fixation in photosynthetic organisms	0.805758	0.844499	0.864865	0.821528
Carbon fixation pathways in prokaryotes	2.26864	2.28989	2.93493	2.66886
Methane metabolism	2.51897	2.50914	3.35536	3.85008
Nitrogen metabolism	2.77713	2.62282	1.90591	1.80292
Sulfur metabolism	0.312916	0.259846	0.224224	0.182068
Fatty acid biosynthesis	0.672769	0.641494	0.640641	0.595053
Fatty acid elongation	0	0.00812018	0	0
Fatty acid metabolism	1.1969	1.1287	1.37738	0.919224
Synthesis and degradation of ketone bodies	0.211218	0.194884	0.32032	0.350815
Cutin, suberine and wax biosynthesis	0.00782289	0	0	0
Primary bile acid biosynthesis	0.0312916	0.0162404	0.024024	0.0222035
Steroid hormone biosynthesis	0.0156458	0.0324807	0.02002	0.0133221
Glycerolipid metabolism	0.383322	0.45473	0.464464	0.515121
Glycerophospholipid metabolism	0.602363	0.406009	0.532533	0.515121
Ether lipid metabolism	0.0234687	0.0324807	0.012012	0.0355256
Sphingolipid metabolism	0.125166	0.170524	0.168168	0.133221
Arachidonic acid metabolism	0.125166	0.0974421	0.0920921	0.0177628
Linoleic acid metabolism	0.0938747	0.154283	0.108108	0.0399663
alpha-Linolenic acid metabolism	0.0469373	0.0243605	0.0680681	0.0133221
Biosynthesis of unsaturated fatty acids	0.273801	0.276086	0.216216	0.182068
Purine metabolism	4.04443	3.4186	4.03604	3.79235
Pyrimidine metabolism	3.09786	2.95575	3.02703	3.17066
Alanine, aspartate and glutamate metabolism	1.92443	1.88388	1.92192	1.58089
Glycine, serine and threonine metabolism	1.5724	1.52659	1.7017	1.61197
Cysteine and methionine metabolism	1.13432	1.18555	1.11311	1.15458
Valine, leucine and isoleucine degradation	1.1969	1.20179	1.53353	1.24339
Valine, leucine and isoleucine biosynthesis	0.813581	0.657734	0.640641	0.430747
Lysine biosynthesis	0.735352	0.633374	0.660661	0.821528
Lysine degradation	0.641477	0.779537	0.752753	0.568409
Arginine and proline metabolism	1.56458	1.7296	1.65365	1.64306
Histidine metabolism	0.633654	0.812018	0.772773	0.76824
Tyrosine metabolism	0.696237	0.657734	0.764765	0.595053
Phenylalanine metabolism	0.719706	0.90946	0.644645	0.421866
Tryptophan metabolism	0.672769	0.9257	0.736737	0.563968
Phenylalanine, tyrosine and tryptophan biosynthesis	0.883987	0.755177	0.792793	0.781562
beta-Alanine metabolism	0.610185	0.633374	0.668669	0.475154
Taurine and hypotaurine metabolism	0.250332	0.203004	0.212212	0.0621697
Phosphonate and phosphinate metabolism	0.0156458	0.0568413	0.016016	0.0310849
Selenocompound metabolism	0.711883	0.698335	0.520521	0.674986
Cyanoamino acid metabolism	0.477196	0.365408	0.38038	0.44851
D-Glutamine and D-glutamate metabolism	0.250332	0.235485	0.272272	0.333052
D-Arginine and D-ornithine metabolism	0	0	0.00800801	0.00888139
D-Alanine metabolism	0.195572	0.186764	0.136136	0.159865
Glutathione metabolism	0.500665	0.584653	0.46046	0.364137
N-Glycan biosynthesis	0.101698	0.089322	0.1001	0.159865
Various types of N-glycan biosynthesis	0.00782289	0.00812018	0.012012	0.0133221
Other types of O-glycan biosynthesis	0.0234687	0.0162404	0.024024	0.0310849
Glycosaminoglycan degradation	0.0234687	0.0406009	0.048048	0.0532883
Glycosylphosphatidylinositol(GPI)-anchor biosynthesis	0.0156458	0	0.02002	0
Glycosphingolipid biosynthesis - lacto and neolacto series	0	0	0	0.0133221
Glycosphingolipid biosynthesis - globo series	0.0860518	0.113683	0.0720721	0.0932546
Glycosphingolipid biosynthesis - ganglio series	0.0156458	0.0324807	0.016016	0.0488476
Lipopolysaccharide biosynthesis	0.500665	0.406009	0.288288	0.293086
Peptidoglycan biosynthesis	1.1265	1.11246	1.14114	1.38106
Other glycan degradation	0.265978	0.219245	0.24024	0.208713
Thiamine metabolism	0.46155	0.267966	0.432432	0.488476
Riboflavin metabolism	0.258155	0.178644	0.216216	0.222035
Vitamin B6 metabolism	0.219041	0.292326	0.28028	0.337493
Nicotinate and nicotinamide metabolism	0.453728	0.617134	0.780781	0.763799
Pantothenate and CoA biosynthesis	0.797935	0.860739	0.736737	0.608375
Biotin metabolism	0.226864	0.121803	0.244244	0.213153
Lipoic acid metabolism	0.0860518	0.0324807	0.16016	0.182068
Folate biosynthesis	0.453728	0.397889	0.396396	0.315289
One carbon pool by folate	0.860518	0.682095	0.808809	0.874817
Retinol metabolism	0.140812	0.105562	0.0960961	0.119899
Porphyrin and chlorophyll metabolism	1.15779	1.01502	0.772773	0.910342
Ubiquinone and other terpenoid-quinone biosynthesis	0.344207	0.357288	0.324324	0.377459
Terpenoid backbone biosynthesis	0.633654	0.657734	0.764765	0.834851
Monoterpenoid biosynthesis	0.00782289	0	0	0
Sesquiterpenoid and triterpenoid biosynthesis	0.0469373	0.0649614	0.036036	0.0222035
Carotenoid biosynthesis	0.0782289	0.162404	0.0600601	0.0799325
Zeatin biosynthesis	0.0469373	0.0406009	0.0720721	0.0399663
Limonene and pinene degradation	0.35203	0.46285	0.388388	0.177628
Geraniol degradation	0.430259	0.389769	0.368368	0.186509
Biosynthesis of 12-, 14- and 16-membered macrolides	0	0.0568413	0	0
Biosynthesis of ansamycins	0.0782289	0.105562	0.18018	0.111017
Biosynthesis of type II polyketide backbone	0	0.00812018	0	0
Biosynthesis of type II polyketide products	0.00782289	0	0	0.00444069
Tetracycline biosynthesis	0.156458	0.129923	0.128128	0.150984
Polyketide sugar unit biosynthesis	0.35203	0.267966	0.236236	0.3819
Nonribosomal peptide structures	0.00782289	0.0162404	0	0
Biosynthesis of siderophore group nonribosomal peptides	0.0234687	0	0.004004	0.0222035
Biosynthesis of vancomycin group antibiotics	0.117343	0.105562	0.108108	0.164306
Phenylpropanoid biosynthesis	0.234687	0.251726	0.192192	0.266442
Stilbenoid, diarylheptanoid and gingerol biosynthesis	0.0391144	0.0568413	0.012012	0.00444069
Flavonoid biosynthesis	0.00782289	0.0243605	0	0
Flavone and flavonol biosynthesis	0	0	0.00800801	0
Isoflavonoid biosynthesis	0.00782289	0	0.032032	0
Indole alkaloid biosynthesis	0.0156458	0.00812018	0.004004	0.0222035
Isoquinoline alkaloid biosynthesis	0.10952	0.154283	0.14014	0.0754918
Tropane, piperidine and pyridine alkaloid biosynthesis	0.195572	0.194884	0.232232	0.124339
Caffeine metabolism	0	0.00812018	0	0
Betalain biosynthesis	0.0156458	0.00812018	0.004004	0.0310849
Penicillin and cephalosporin biosynthesis	0.172104	0.170524	0.152152	0.115458
beta-Lactam resistance	0.0156458	0.0487211	0.032032	0.0222035
Streptomycin biosynthesis	0.571071	0.422249	0.528529	0.657223
Butirosin and neomycin biosynthesis	0.0782289	0.0162404	0.0880881	0.0843732
Novobiocin biosynthesis	0.187749	0.138043	0.22022	0.146543
Benzoate degradation	0.641477	0.747056	0.840841	0.568409
Aminobenzoate degradation	0.485019	0.576533	0.392392	0.213153
Fluorobenzoate degradation	0.0782289	0.105562	0.044044	0.00444069
Chloroalkane and chloroalkene degradation	0.430259	0.560292	0.46046	0.324171
Chlorocyclohexane and chlorobenzene degradation	0.140812	0.186764	0.0840841	0.0222035
Toluene degradation	0.320738	0.406009	0.304304	0.119899
Xylene degradation	0.0547602	0.0812018	0.0800801	0.0355256
Nitrotoluene degradation	0.375499	0.357288	0.592593	0.590612
Ethylbenzene degradation	0.101698	0.0974421	0.176176	0.0666104
Styrene degradation	0.148635	0.194884	0.144144	0.173187
Atrazine degradation	0.0625831	0.121803	0.112112	0.119899
Caprolactam degradation	0.211218	0.243605	0.172172	0.0488476
Trichloro-2,2-bis(4-chlorophenyl)ethane (DDT) degradation	0	0.0162404	0	0.00444069
Bisphenol degradation	0.156458	0.227365	0.16016	0.0976953
Dioxin degradation	0.0391144	0.0730816	0.0720721	0.0177628
Naphthalene degradation	0.187749	0.154283	0.164164	0.177628
Polycyclic aromatic hydrocarbon degradation	0.140812	0.211125	0.192192	0.186509
Steroid degradation	0	0.0162404	0.004004	0
Metabolism of xenobiotics by cytochrome P450	0.164281	0.170524	0.1001	0.111017
Drug metabolism - cytochrome P450	0.179926	0.194884	0.1001	0.115458
Drug metabolism - other enzymes	0.453728	0.357288	0.444444	0.484036
RNA polymerase	0.602363	0.511571	0.532533	0.581731
Basal transcription factors	0.0234687	0.0162404	0.048048	0.0177628
Spliceosome	0.0156458	0.00812018	0.004004	0.00444069
Ribosome	1.50199	1.29923	1.61361	1.77628
Aminoacyl-tRNA biosynthesis	2.25299	2.31425	2.82282	2.76655
RNA transport	0.0938747	0.121803	0.16016	0.146543
mRNA surveillance pathway	0.0547602	0.0162404	0.02002	0.0177628
Ribosome biogenesis in eukaryotes	0.0312916	0.0324807	0.0680681	0.0444069
Protein export	0.641477	0.755177	0.808809	0.839291
Protein processing in endoplasmic reticulum	0.0938747	0.105562	0.164164	0.12878
Ubiquitin mediated proteolysis	0.0156458	0.00812018	0.004004	0.0133221
Sulfur relay system	0.312916	0.316687	0.372372	0.346374
Proteasome	0.0312916	0.00812018	0.0920921	0.0177628
RNA degradation	0.743175	0.90946	0.844845	0.83041
DNA replication	1.11085	1.0881	1.14114	1.17678
Base excision repair	0.70406	0.722696	0.700701	0.839291
Nucleotide excision repair	0.970038	1.1287	1.10511	1.18567
Mismatch repair	1.34554	1.34795	1.4975	1.54092
Homologous recombination	1.36118	1.40479	1.37738	1.43879
Non-homologous end-joining	0.0234687	0.0243605	0.036036	0.0266442
Fanconi anemia pathway	0	0.0243605	0.032032	0.0133221
ABC transporters	3.05875	3.32927	3.33534	4.02771
Phosphotransferase system (PTS)	0.0938747	0.154283	0.0920921	0.226475
Bacterial secretion system	0.868341	0.836378	0.856857	0.821528
Two-component system	3.39513	3.5404	2.37437	3.18842
MAPK signaling pathway	0.00782289	0	0	0.00444069
MAPK signaling pathway - yeast	0.0234687	0.0406009	0.00800801	0.0355256
Wnt signaling pathway	0	0	0.004004	0.00444069
Hedgehog signaling pathway	0	0	0.00800801	0
TGF-beta signaling pathway	0.00782289	0	0.004004	0
VEGF signaling pathway	0	0	0	0.00444069
NF-kappa B signaling pathway	0	0.00812018	0	0
Calcium signaling pathway	0	0.00812018	0.00800801	0.00444069
Phosphatidylinositol signaling system	0.070406	0.0812018	0.104104	0.106577
PI3K-Akt signaling pathway	0.0625831	0.129923	0.048048	0.0621697
Signaling Molecules and Interaction	0.0156458	0	0	0
Endocytosis	0	0.00812018	0	0.00444069
Phagosome	0.00782289	0.00812018	0	0.0133221
Lysosome	0.10952	0.0974421	0.112112	0.0976953
Peroxisome	0.524134	0.544052	0.512513	0.395222
Regulation of autophagy	0	0	0.004004	0
Bacterial chemotaxis	0.868341	0.722696	0.336336	0.70607
Flagellar assembly	0.852695	0.535932	0.404404	0.377459
Regulation of actin cytoskeleton	0.00782289	0	0	0
Cell cycle	0.0156458	0.00812018	0.02002	0.0222035
Cell cycle - yeast	0.0156458	0.00812018	0.00800801	0.0177628
Cell cycle - Caulobacter	1.10303	0.966301	0.896897	0.834851
Meiosis - yeast	0.148635	0.178644	0.0600601	0.106577
Oocyte meiosis	0.0156458	0.00812018	0.00800801	0.0177628
Apoptosis	0	0.0243605	0.00800801	0.0133221
p53 signaling pathway	0.00782289	0.00812018	0.004004	0.00888139
Focal adhesion	0.0156458	0	0	0
Tight junction	0	0	0.004004	0
Gap junction	0.00782289	0.00812018	0.004004	0
Hematopoietic cell lineage	0.00782289	0	0	0.00444069
Complement and coagulation cascades	0.00782289	0	0.004004	0.00888139
Toll-like receptor signaling pathway	0	0.00812018	0	0
NOD-like receptor signaling pathway	0.00782289	0.0324807	0.016016	0.00888139
Natural killer cell mediated cytotoxicity	0	0	0	0.00444069
Antigen processing and presentation	0.00782289	0.0324807	0.016016	0.00888139
T cell receptor signaling pathway	0	0	0	0.00444069
B cell receptor signaling pathway	0	0	0	0.00444069
Fc gamma R-mediated phagocytosis	0	0.00812018	0	0
Insulin signaling pathway	0.156458	0.308567	0.104104	0.159865
Adipocytokine signaling pathway	0.320738	0.332927	0.352352	0.284204
PPAR signaling pathway	0.531957	0.44661	0.532533	0.417425
GnRH signaling pathway	0	0.00812018	0	0
Progesterone-mediated oocyte maturation	0.0234687	0.0406009	0.02002	0.0222035
Melanogenesis	0	0	0	0.00888139
Renin-angiotensin system	0	0.00812018	0.004004	0.00444069
Cardiac muscle contraction	0.00782289	0.0243605	0.004004	0.00444069
Salivary secretion	0.00782289	0.0162404	0.004004	0
Gastric acid secretion	0	0.00812018	0	0
Pancreatic secretion	0	0.00812018	0.012012	0.0177628
Bile secretion	0.0156458	0.0243605	0.004004	0
Carbohydrate digestion and absorption	0.00782289	0.0649614	0.02002	0.0444069
Protein digestion and absorption	0.0469373	0.0406009	0.036036	0.0177628
Mineral absorption	0.00782289	0.00812018	0.012012	0
Vasopressin-regulated water reabsorption	0.00782289	0.00812018	0	0.00444069
Aldosterone-regulated sodium reabsorption	0.00782289	0.00812018	0	0
Endocrine and other factor-regulated calcium reabsorption	0	0.00812018	0	0
Proximal tubule bicarbonate reclamation	0.125166	0.162404	0.132132	0.146543
Glutamatergic synapse	0.187749	0.186764	0.168168	0.150984
GABAergic synapse	0.195572	0.186764	0.168168	0.150984
Dopaminergic synapse	0.0312916	0.0324807	0.012012	0.0310849
Serotonergic synapse	0.0312916	0.0324807	0.00800801	0.0266442
Long-term potentiation	0	0	0	0.00444069
Long-term depression	0.00782289	0.00812018	0.00800801	0
Retrograde endocannabinoid signaling	0	0.0487211	0.028028	0.0222035
Synaptic vesicle cycle	0.00782289	0.00812018	0	0.00444069
Olfactory transduction	0.00782289	0.00812018	0.004004	0
Axon guidance	0	0	0	0.00444069
Osteoclast differentiation	0	0	0	0.00444069
Circadian rhythm - mammal	0	0	0.004004	0
Circadian rhythm - plant	0	0.00812018	0	0
Plant-pathogen interaction	0.35203	0.267966	0.2002	0.279764
Pathways in cancer	0.0547602	0.0568413	0.0840841	0.0222035
Chemical carcinogenesis	0.0312916	0.0730816	0.00800801	0
Viral carcinogenesis	0.0625831	0.0568413	0.108108	0.102136
Colorectal cancer	0	0	0.00800801	0.0133221
Basal cell carcinoma	0	0	0.00800801	0
Renal cell carcinoma	0.0391144	0.0243605	0.0520521	0
Bladder cancer	0.0234687	0.00812018	0.00800801	0
Prostate cancer	0.00782289	0.0324807	0.016016	0.00888139
Small cell lung cancer	0.00782289	0	0.004004	0.00888139
Systemic lupus erythematosus	0	0	0.004004	0.00888139
Rheumatoid arthritis	0	0.00812018	0	0
Primary immunodeficiency	0.0312916	0.0568413	0.028028	0.0488476
Alzheimer's disease	0.101698	0.129923	0.0640641	0.111017
Parkinson's disease	0.0156458	0.0406009	0.012012	0.0177628
Amyotrophic lateral sclerosis (ALS)	0	0	0.012012	0.0133221
Huntington's disease	0.0547602	0.0812018	0.0880881	0.0444069
Prion diseases	0	0	0.00800801	0
Cocaine addiction	0.0312916	0.0324807	0.00800801	0.0266442
Amphetamine addiction	0.0312916	0.0324807	0.00800801	0.0310849
Morphine addiction	0.0156458	0.00812018	0	0.0177628
Alcoholism	0.0312916	0.0324807	0.00800801	0.0266442
Hypertrophic cardiomyopathy (HCM)	0.00782289	0.00812018	0.004004	0
Arrhythmogenic right ventricular cardiomyopathy (ARVC)	0.00782289	0	0	0
Dilated cardiomyopathy (DCM)	0.00782289	0	0	0
Viral myocarditis	0	0	0.004004	0.00888139
Type I diabetes mellitus	0.101698	0.138043	0.132132	0.106577
Type II diabetes mellitus	0.0469373	0.0487211	0.0880881	0.0799325
Vibrio cholerae infection	0	0	0.004004	0.00888139
Vibrio cholerae pathogenic cycle	0.156458	0.113683	0.0960961	0.146543
Epithelial cell signaling in Helicobacter pylori infection	0.0547602	0.0730816	0.04004	0.0310849
Pathogenic Escherichia coli infection	0	0.00812018	0	0
Salmonella infection	0.172104	0.0730816	0.0720721	0.0488476
Pertussis	0.0547602	0.0568413	0.016016	0.0266442
Legionellosis	0.375499	0.332927	0.396396	0.368578
Staphylococcus aureus infection	0	0	0	0.00888139
Tuberculosis	0.375499	0.381648	0.372372	0.452951
Bacterial invasion of epithelial cells	0.0156458	0.0243605	0.02002	0.0133221
HTLV-I infection	0.0234687	0.00812018	0.024024	0.0399663
Measles	0	0.00812018	0.00800801	0.00444069
Influenza A	0	0.00812018	0.016016	0.0133221
Hepatitis B	0	0.00812018	0.02002	0.0177628
Hepatitis C	0	0	0.012012	0.00444069
Herpes simplex infection	0.0156458	0.00812018	0.032032	0.0399663
Epstein-Barr virus infection	0.0156458	0.00812018	0.02002	0.0133221
Amoebiasis	0.0312916	0.0487211	0.0960961	0.0399663
Malaria	0.00782289	0.00812018	0	0
Toxoplasmosis	0	0.00812018	0.004004	0.00888139
Leishmaniasis	0	0.00812018	0	0.00888139
Chagas disease (American trypanosomiasis)	0.0234687	0.0162404	0.016016	0.00888139
African trypanosomiasis	0.0156458	0.00812018	0.00800801	0

## Sheet: KEGG_orthologous_gene_count
Absolute count of unique KEGG Orthology Idntifiers (KO-Ids) identified asross the four metahenomes based on MEGAN v5.3.0
Sample ID	HT-1	TP-2	TB-3	AT-4
K00845 - glucokinase [EC:2.7.1.2]	10	2	22	19
K01810 - glucose-6-phosphate isomerase [EC:5.3.1.9]	7	6	10	15
K06859 - glucose-6-phosphate isomerase, archaeal [EC:5.3.1.9]	1	1	4	1
K13810 - transaldolase / glucose-6-phosphate isomerase [EC:2.2.1.2 5.3.1.9]	0	3	3	1
K00850 - 6-phosphofructokinase 1 [EC:2.7.1.11]	9	12	18	33
K03841 - fructose-1,6-bisphosphatase I [EC:3.1.3.11]	2	3	1	7
K02446 - fructose-1,6-bisphosphatase II [EC:3.1.3.11]	5	3	1	10
K01623 - fructose-bisphosphate aldolase, class I [EC:4.1.2.13]	4	7	10	1
K11645 - fructose-bisphosphate aldolase, class I [EC:4.1.2.13]	0	0	0	1
K01624 - fructose-bisphosphate aldolase, class II [EC:4.1.2.13]	7	4	5	5
K01803 - triosephosphate isomerase (TIM) [EC:5.3.1.1]	10	5	20	7
K00134 - glyceraldehyde 3-phosphate dehydrogenase [EC:1.2.1.12]	10	12	14	20
K00150 - glyceraldehyde-3-phosphate dehydrogenase (NAD(P)) [EC:1.2.1.59]	0	0	0	1
K00927 - phosphoglycerate kinase [EC:2.7.2.3]	6	6	13	17
K01834 - 2,3-bisphosphoglycerate-dependent phosphoglycerate mutase [EC:5.4.2.1]	21	14	40	40
K01689 - enolase [EC:4.2.1.11]	7	13	29	17
K00873 - pyruvate kinase [EC:2.7.1.40]	6	6	22	18
K00163 - pyruvate dehydrogenase E1 component [EC:1.2.4.1]	6	1	13	4
K00161 - pyruvate dehydrogenase E1 component subunit alpha [EC:1.2.4.1]	10	6	10	5
K00162 - pyruvate dehydrogenase E1 component subunit beta [EC:1.2.4.1]	5	8	14	6
K00627 - pyruvate dehydrogenase E2 component (dihydrolipoamide acetyltransferase) [EC:2.3.1.12]	15	6	21	12
K00382 - dihydrolipoamide dehydrogenase [EC:1.8.1.4]	11	6	27	27
K00169 - pyruvate ferredoxin oxidoreductase, alpha subunit [EC:1.2.7.1]	6	4	17	16
K00170 - pyruvate ferredoxin oxidoreductase, beta subunit [EC:1.2.7.1]	6	2	16	15
K00171 - pyruvate ferredoxin oxidoreductase, delta subunit [EC:1.2.7.1]	0	1	3	6
K00172 - pyruvate ferredoxin oxidoreductase, gamma subunit [EC:1.2.7.1]	2	6	17	7
K00016 - L-lactate dehydrogenase [EC:1.1.1.27]	0	2	1	1
K00121 - S-(hydroxymethyl)glutathione dehydrogenase / alcohol dehydrogenase [EC:1.1.1.284 1.1.1.1]	1	1	0	0
K04072 - acetaldehyde dehydrogenase / alcohol dehydrogenase [EC:1.2.1.10 1.1.1.1]	1	1	6	4
K13953 - alcohol dehydrogenase, propanol-preferring [EC:1.1.1.1]	8	8	14	12
K13954 - alcohol dehydrogenase [EC:1.1.1.1]	1	1	2	1
K00001 - alcohol dehydrogenase [EC:1.1.1.1]	9	4	9	13
K00114 - alcohol dehydrogenase (cytochrome c) [EC:1.1.2.8]	1	0	2	0
K00128 - aldehyde dehydrogenase (NAD+) [EC:1.2.1.3]	8	18	31	11
K01895 - acetyl-CoA synthetase [EC:6.2.1.1]	17	16	44	35
K01905 - acetyl-CoA synthetase (ADP-forming) [EC:6.2.1.13]	2	5	23	19
K01785 - aldose 1-epimerase [EC:5.1.3.3]	1	0	3	1
K01835 - phosphoglucomutase [EC:5.4.2.2]	8	4	14	4
K00886 - polyphosphate glucokinase [EC:2.7.1.63]	0	1	0	0
K01792 - glucose-6-phosphate 1-epimerase [EC:5.1.3.15]	0	1	0	0
K03738 - aldehyde:ferredoxin oxidoreductase [EC:1.2.7.5]	21	18	60	96
K11389 - glyceraldehyde-3-phosphate dehydrogenase (ferredoxin) [EC:1.2.7.6]	1	1	0	0
K00131 - glyceraldehyde-3-phosphate dehydrogenase (NADP) [EC:1.2.1.9]	2	0	0	1
K01596 - phosphoenolpyruvate carboxykinase (GTP) [EC:4.1.1.32]	5	9	7	12
K01610 - phosphoenolpyruvate carboxykinase (ATP) [EC:4.1.1.49]	3	5	9	15
K01222 - 6-phospho-beta-glucosidase [EC:3.2.1.86]	1	1	1	9
K00108 - choline dehydrogenase	2	4	0	0
K01647 - citrate synthase [EC:2.3.3.1]	12	12	14	7
K01648 - ATP citrate (pro-S)-lyase [EC:2.3.3.8]	1	0	0	0
K01681 - aconitate hydratase 1 [EC:4.2.1.3]	18	12	13	5
K01682 - aconitate hydratase 2 / 2-methylisocitrate dehydratase [EC:4.2.1.3 4.2.1.99]	1	1	0	0
K00031 - isocitrate dehydrogenase [EC:1.1.1.42]	7	10	11	5
K00030 - isocitrate dehydrogenase (NAD+) [EC:1.1.1.41]	8	0	6	5
K00164 - 2-oxoglutarate dehydrogenase E1 component [EC:1.2.4.2]	8	8	8	4
K00658 - 2-oxoglutarate dehydrogenase E2 component (dihydrolipoamide succinyltransferase) [EC:2.3.1.61]	7	6	3	4
K00174 - 2-oxoglutarate ferredoxin oxidoreductase subunit alpha [EC:1.2.7.3]	21	10	60	49
K00175 - 2-oxoglutarate ferredoxin oxidoreductase subunit beta [EC:1.2.7.3]	9	11	42	47
K00177 - 2-oxoglutarate ferredoxin oxidoreductase subunit gamma [EC:1.2.7.3]	0	4	18	17
K00176 - 2-oxoglutarate ferredoxin oxidoreductase subunit delta [EC:1.2.7.3]	2	1	9	9
K01902 - succinyl-CoA synthetase alpha subunit [EC:6.2.1.5]	7	4	16	11
K01903 - succinyl-CoA synthetase beta subunit [EC:6.2.1.5]	6	6	16	23
K00239 - succinate dehydrogenase flavoprotein subunit [EC:1.3.99.1]	11	12	33	20
K00240 - succinate dehydrogenase iron-sulfur subunit [EC:1.3.99.1]	7	8	10	1
K00241 - succinate dehydrogenase cytochrome b556 subunit	4	6	9	0
K00242 - succinate dehydrogenase membrane anchor subunit	1	0	0	1
K00244 - fumarate reductase flavoprotein subunit [EC:1.3.99.1]	1	3	3	1
K00245 - fumarate reductase iron-sulfur subunit [EC:1.3.99.1]	0	2	0	0
K01676 - fumarate hydratase, class I [EC:4.2.1.2]	3	5	8	13
K01677 - fumarate hydratase subunit alpha [EC:4.2.1.2]	3	3	5	6
K01678 - fumarate hydratase subunit beta [EC:4.2.1.2]	1	2	8	7
K01679 - fumarate hydratase, class II [EC:4.2.1.2]	5	3	13	0
K00024 - malate dehydrogenase [EC:1.1.1.37]	6	2	8	5
K01958 - pyruvate carboxylase [EC:6.4.1.1]	0	4	4	0
K01959 - pyruvate carboxylase subunit A [EC:6.4.1.1]	4	0	4	12
K01960 - pyruvate carboxylase subunit B [EC:6.4.1.1]	4	1	22	11
K01643 - citrate lyase subunit alpha / citrate CoA-transferase [EC:4.1.3.6 2.8.3.10]	0	5	0	0
K01644 - citrate lyase subunit beta / citryl-CoA lyase [EC:4.1.3.6 4.1.3.34]	1	4	1	1
K00036 - glucose-6-phosphate 1-dehydrogenase [EC:1.1.1.49]	7	5	4	4
K01057 - 6-phosphogluconolactonase [EC:3.1.1.31]	2	1	3	1
K07404 - 6-phosphogluconolactonase [EC:3.1.1.31]	1	1	1	0
K00033 - 6-phosphogluconate dehydrogenase [EC:1.1.1.44]	8	4	9	6
K01783 - ribulose-phosphate 3-epimerase [EC:5.1.3.1]	2	5	12	13
K00615 - transketolase [EC:2.2.1.1]	10	13	45	25
K00616 - transaldolase [EC:2.2.1.2]	9	7	16	12
K01807 - ribose 5-phosphate isomerase A [EC:5.3.1.6]	1	1	5	3
K01808 - ribose 5-phosphate isomerase B [EC:5.3.1.6]	5	6	3	9
K13812 - bifunctional enzyme Fae/Hps [EC:4.3.-.- 4.1.2.43]	0	0	1	3
K08094 - 6-phospho-3-hexuloisomerase [EC:5.3.1.27]	2	0	0	0
K13831 - 3-hexulose-6-phosphate synthase / 6-phospho-3-hexuloisomerase [EC:4.1.2.43 5.3.1.27]	1	0	0	0
K01621 - phosphoketolase [EC:4.1.2.9]	1	2	2	0
K01619 - deoxyribose-phosphate aldolase [EC:4.1.2.4]	5	4	9	12
K00852 - ribokinase [EC:2.7.1.15]	4	4	8	12
K01839 - phosphopentomutase [EC:5.4.2.7]	3	3	7	3
K00948 - ribose-phosphate pyrophosphokinase [EC:2.7.6.1]	14	8	21	17
K01690 - phosphogluconate dehydratase [EC:4.2.1.12]	0	1	0	0
K01625 - 2-dehydro-3-deoxyphosphogluconate aldolase / 4-hydroxy-2-oxoglutarate aldolase [EC:4.1.2.14 4.1.3.16]	3	1	4	8
K00034 - glucose 1-dehydrogenase [EC:1.1.1.47]	1	1	2	2
K00117 - quinoprotein glucose dehydrogenase [EC:1.1.5.2]	2	0	1	0
K01053 - gluconolactonase [EC:3.1.1.17]	1	4	5	0
K06152 - gluconate 2-dehydrogenase gamma chain [EC:1.1.99.3]	0	1	0	0
K00090 - gluconate 2-dehydrogenase [EC:1.1.1.215]	0	2	3	1
K00851 - gluconokinase [EC:2.7.1.12]	0	3	2	1
K05308 - gluconate dehydratase [EC:4.2.1.39]	2	0	2	0
K00874 - 2-dehydro-3-deoxygluconokinase [EC:2.7.1.45]	2	5	7	4
K01051 - pectinesterase [EC:3.1.1.11]	0	1	0	0
K01728 - pectate lyase [EC:4.2.2.2]	1	2	1	0
K01730 - oligogalacturonide lyase [EC:4.2.2.6]	0	2	1	0
K01815 - 4-deoxy-L-threo-5-hexosulose-uronate ketol-isomerase [EC:5.3.1.17]	1	0	0	0
K00065 - 2-deoxy-D-gluconate 3-dehydrogenase [EC:1.1.1.125]	2	4	2	0
K01213 - galacturan 1,4-alpha-galacturonidase [EC:3.2.1.67]	0	0	2	0
K01812 - glucuronate isomerase [EC:5.3.1.12]	0	4	3	2
K00041 - tagaturonate reductase [EC:1.1.1.58]	1	0	0	0
K01685 - altronate hydrolase [EC:4.2.1.7]	0	3	6	0
K01686 - mannonate dehydratase [EC:4.2.1.8]	2	1	2	0
K01195 - beta-glucuronidase [EC:3.2.1.31]	0	0	2	0
K00012 - UDPglucose 6-dehydrogenase [EC:1.1.1.22]	8	10	9	24
K00963 - UTP--glucose-1-phosphate uridylyltransferase [EC:2.7.7.9]	4	5	11	12
K00880 - L-xylulokinase [EC:2.7.1.53]	0	1	0	0
K03082 - hexulose-6-phosphate isomerase [EC:5.-.-.-]	0	0	3	0
K01786 - L-ribulose-5-phosphate 4-epimerase [EC:5.1.3.4]	1	2	4	1
K01804 - L-arabinose isomerase [EC:5.3.1.4]	0	2	3	0
K00853 - L-ribulokinase [EC:2.7.1.16]	1	2	1	1
K00854 - xylulokinase [EC:2.7.1.17]	6	20	16	26
K01805 - xylose isomerase [EC:5.3.1.5]	1	4	3	6
K01820 - [EC:5.3.1.-]	2	3	1	2
K00848 - rhamnulokinase [EC:2.7.1.5]	3	2	3	3
K01629 - rhamnulose-1-phosphate aldolase [EC:4.1.2.19]	1	0	2	5
K00875 - D-ribulokinase [EC:2.7.1.47]	0	0	1	0
K01218 - mannan endo-1,4-beta-mannosidase [EC:3.2.1.78]	0	0	1	0
K00847 - fructokinase [EC:2.7.1.4]	1	0	4	10
K01809 - mannose-6-phosphate isomerase [EC:5.3.1.8]	3	1	5	4
K01840 - phosphomannomutase [EC:5.4.2.8]	15	15	25	43
K00971 - mannose-1-phosphate guanylyltransferase [EC:2.7.7.13]	2	5	7	16
K00966 - mannose-1-phosphate guanylyltransferase [EC:2.7.7.13]	4	6	6	4
K01711 - GDPmannose 4,6-dehydratase [EC:4.2.1.47]	8	11	10	25
K02377 - GDP-L-fucose synthase [EC:1.1.1.271]	5	5	2	1
K01818 - L-fucose isomerase [EC:5.3.1.25]	5	1	3	2
K00879 - L-fuculokinase [EC:2.7.1.51]	0	0	1	0
K01628 - L-fuculose-phosphate aldolase [EC:4.1.2.17]	1	1	6	6
K12661 - L-rhamnonate dehydratase [EC:4.2.1.90]	1	0	0	0
K01813 - L-rhamnose isomerase [EC:5.3.1.14]	1	3	1	3
K07026 - mannosyl-3-phosphoglycerate phosphatase [EC:3.1.3.70]	0	1	0	0
K00895 - pyrophosphate--fructose-6-phosphate 1-phosphotransferase [EC:2.7.1.90]	4	2	0	2
K01112 - [EC:3.1.3.-]	0	1	0	1
K00009 - mannitol-1-phosphate 5-dehydrogenase [EC:1.1.1.17]	0	2	0	0
K00100 - [EC:1.1.1.-]	12	18	27	9
K00882 - 1-phosphofructokinase [EC:2.7.1.56]	2	2	7	5
K00008 - L-iditol 2-dehydrogenase [EC:1.1.1.14]	8	3	9	8
K00066 - GDP-mannose 6-dehydrogenase [EC:1.1.1.132]	2	0	3	1
K00754 - [EC:2.4.1.-]	16	11	30	14
K02768 - PTS system, fructose-specific IIA component [EC:2.7.1.69]	0	1	0	1
K02770 - PTS system, fructose-specific IIC component	1	0	0	2
K02793 - PTS system, mannose-specific IIA component [EC:2.7.1.69]	1	1	1	2
K02794 - PTS system, mannose-specific IIB component [EC:2.7.1.69]	0	0	1	3
K02795 - PTS system, mannose-specific IIC component	0	0	1	4
K02796 - PTS system, mannose-specific IID component	0	0	1	2
K02800 - PTS system, mannitol-specific IIC component	0	1	0	0
K02782 - PTS system, glucitol/sorbitol-specific IIB component [EC:2.7.1.69]	0	1	0	0
K02783 - PTS system, glucitol/sorbitol-specific IIC component	1	0	1	2
K02813 - PTS system, sorbose-specific IIB component [EC:2.7.1.69]	0	0	0	1
K00849 - galactokinase [EC:2.7.1.6]	6	7	10	10
K01784 - UDP-glucose 4-epimerase [EC:5.1.3.2]	20	22	58	69
K01190 - beta-galactosidase [EC:3.2.1.23]	4	5	8	7
K12308 - beta-galactosidase [EC:3.2.1.23]	6	3	22	25
K00965 - UDPglucose--hexose-1-phosphate uridylyltransferase [EC:2.7.7.12]	6	5	13	13
K07406 - alpha-galactosidase [EC:3.2.1.22]	5	6	10	5
K07407 - alpha-galactosidase [EC:3.2.1.22]	4	4	4	5
K02773 - PTS system, galactitol-specific IIA component [EC:2.7.1.69]	1	0	0	0
K00917 - tagatose 6-phosphate kinase [EC:2.7.1.144]	1	0	1	0
K01635 - tagatose 1,6-diphosphate aldolase [EC:4.1.2.40]	0	1	0	1
K08302 - tagatose 1,6-diphosphate aldolase [EC:4.1.2.40]	1	2	0	0
K04618 - galactose oxidase [EC:1.1.3.9]	0	1	3	2
K01684 - galactonate dehydratase [EC:4.2.1.6]	3	1	2	0
K00883 - 2-dehydro-3-deoxygalactonokinase [EC:2.7.1.58]	1	0	1	0
K01631 - 2-dehydro-3-deoxyphosphogalactonate aldolase [EC:4.1.2.21]	0	0	1	0
K01220 - 6-phospho-beta-galactosidase [EC:3.2.1.85]	0	0	0	1
K01193 - beta-fructofuranosidase [EC:3.2.1.26]	3	2	0	0
K01187 - alpha-glucosidase [EC:3.2.1.20]	11	10	7	15
K01182 - oligo-1,6-glucosidase [EC:3.2.1.10]	0	1	0	0
K00103 - L-gulonolactone oxidase [EC:1.1.3.8]	1	1	0	0
K00064 - D-threo-aldose 1-dehydrogenase [EC:1.1.1.122]	1	0	0	0
K02821 - PTS system, ascorbate-specific IIA component [EC:2.7.1.69]	1	2	2	1
K00423 - L-ascorbate oxidase [EC:1.10.3.3]	1	0	0	0
K01706 - glucarate dehydratase [EC:4.2.1.40]	1	1	3	8
K01630 - 2-dehydro-3-deoxyglucarate aldolase [EC:4.1.2.20]	2	1	0	0
K01707 - 5-dehydro-4-deoxyglucarate dehydratase [EC:4.2.1.41]	0	0	1	0
K01708 - galactarate dehydratase [EC:4.2.1.42]	1	0	0	0
K01212 - levanase [EC:3.2.1.65]	1	3	0	0
K00696 - sucrose-phosphate synthase [EC:2.4.1.14]	2	0	1	7
K00695 - sucrose synthase [EC:2.4.1.13]	1	1	0	0
K05341 - amylosucrase [EC:2.4.1.4]	1	0	0	2
K01188 - beta-glucosidase [EC:3.2.1.21]	5	5	8	12
K05349 - beta-glucosidase [EC:3.2.1.21]	15	7	17	26
K05350 - beta-glucosidase [EC:3.2.1.21]	2	7	14	19
K00697 - trehalose 6-phosphate synthase [EC:2.4.1.15]	1	1	2	0
K13057 - trehalose synthase [EC:2.4.1.245]	2	1	3	5
K01838 - beta-phosphoglucomutase [EC:5.4.2.6]	1	2	1	1
K05343 - maltose alpha-D-glucosyltransferase/ alpha-amylase [EC:5.4.99.16 3.2.1.1]	1	7	0	8
K02438 - glycogen operon protein [EC:3.2.1.-]	5	2	5	3
K06044 - (1->4)-alpha-D-glucan 1-alpha-D-glucosylmutase [EC:5.4.99.15]	2	4	2	4
K01236 - maltooligosyltrehalose trehalohydrolase [EC:3.2.1.141]	1	1	0	1
K01198 - xylan 1,4-beta-xylosidase [EC:3.2.1.37]	1	2	0	1
K00975 - glucose-1-phosphate adenylyltransferase [EC:2.7.7.27]	14	7	9	18
K00703 - starch synthase [EC:2.4.1.21]	6	5	13	13
K00700 - 1,4-alpha-glucan branching enzyme [EC:2.4.1.18]	4	9	9	6
K00688 - starch phosphorylase [EC:2.4.1.1]	13	19	11	17
K00690 - sucrose phosphorylase [EC:2.4.1.7]	0	1	0	1
K00693 - glycogen(starch) synthase [EC:2.4.1.11]	0	2	0	0
K01176 - alpha-amylase [EC:3.2.1.1]	1	7	5	10
K07405 - alpha-amylase [EC:3.2.1.1]	1	4	7	11
K01178 - glucoamylase [EC:3.2.1.3]	2	2	7	1
K01208 - cyclomaltodextrinase [EC:3.2.1.54]	0	1	1	1
K00705 - 4-alpha-glucanotransferase [EC:2.4.1.25]	11	10	10	9
K00978 - glucose-1-phosphate cytidylyltransferase [EC:2.7.7.33]	1	2	1	0
K00694 - cellulose synthase (UDP-forming) [EC:2.4.1.12]	2	0	6	8
K01179 - endoglucanase [EC:3.2.1.4]	12	4	33	49
K01225 - cellulose 1,4-beta-cellobiosidase [EC:3.2.1.91]	0	3	5	0
K00702 - cellobiose phosphorylase [EC:2.4.1.20]	3	1	8	5
K01183 - chitinase [EC:3.2.1.14]	1	1	7	2
K01207 - beta-N-acetylhexosaminidase [EC:3.2.1.52]	8	8	11	9
K12373 - hexosaminidase [EC:3.2.1.52]	2	4	4	11
K01452 - chitin deacetylase [EC:3.5.1.41]	1	0	0	0
K07106 - N-acetylmuramic acid 6-phosphate etherase [EC:4.2.1.126]	2	3	6	1
K00884 - N-acetylglucosamine kinase [EC:2.7.1.59]	0	0	1	0
K00972 - UDP-N-acetylglucosamine pyrophosphorylase [EC:2.7.7.23]	0	0	1	0
K04042 - bifunctional UDP-N-acetylglucosamine pyrophosphorylase / Glucosamine-1-phosphate N-acetyltransferase [EC:2.7.7.23 2.3.1.157]	7	5	19	11
K11528 - UDP-N-acetylglucosamine pyrophosphorylase [EC:2.7.7.23]	1	0	0	0
K01791 - UDP-N-acetylglucosamine 2-epimerase [EC:5.1.3.14]	6	6	5	14
K01787 - N-acylglucosamine 2-epimerase [EC:5.1.3.8]	1	0	0	0
K01788 - N-acylglucosamine-6-phosphate 2-epimerase [EC:5.1.3.9]	0	1	0	0
K01654 - N-acetylneuraminate synthase [EC:2.5.1.56]	5	6	0	1
K01639 - N-acetylneuraminate lyase [EC:4.1.3.3]	0	1	0	0
K00983 - N-acylneuraminate cytidylyltransferase [EC:2.7.7.43]	2	1	1	0
K02472 - UDP-N-acetyl-D-mannosaminuronic acid dehydrogenase [EC:1.1.1.-]	2	2	2	3
K02473 - UDP-N-acetylglucosamine 4-epimerase [EC:5.1.3.7]	0	0	2	0
K02474 - UDP-N-acetyl-D-galactosamine dehydrogenase [EC:1.1.1.-]	1	1	8	0
K00790 - UDP-N-acetylglucosamine 1-carboxyvinyltransferase [EC:2.5.1.7]	13	5	17	12
K00075 - UDP-N-acetylmuramate dehydrogenase [EC:1.1.1.158]	6	3	9	16
K02763 - PTS system, D-glucosamine-specific IIA component [EC:2.7.1.69]	0	0	1	0
K03431 - phosphoglucosamine mutase [EC:5.4.2.10]	7	2	6	11
K01443 - N-acetylglucosamine-6-phosphate deacetylase [EC:3.5.1.25]	4	2	8	2
K02564 - glucosamine-6-phosphate deaminase [EC:3.5.99.6]	1	0	1	2
K00820 - glucosamine--fructose-6-phosphate aminotransferase (isomerizing) [EC:2.6.1.16]	10	17	35	33
K12410 - NAD-dependent deacetylase [EC:3.5.1.-]	4	7	14	20
K12446 - L-arabinokinase [EC:2.7.1.46]	0	1	0	0
K01209 - alpha-N-arabinofuranosidase [EC:3.2.1.55]	7	3	6	1
K10011 - UDP-4-amino-4-deoxy-L-arabinose formyltransferase / UDP-glucuronic acid dehydrogenase (UDP-4-keto-hexauronic acid decarboxylating) [EC:2.1.2.13 1.1.1.305]	0	1	1	1
K07806 - UDP-4-amino-4-deoxy-L-arabinose-oxoglutarate aminotransferase [EC:2.6.1.87]	2	1	0	0
K10012 - undecaprenyl-phosphate 4-deoxy-4-formamido-L-arabinose transferase [EC:2.7.8.30]	1	0	2	0
K06118 - UDP-sulfoquinovose synthase [EC:3.13.1.1]	0	1	0	0
K01709 - CDP-glucose 4,6-dehydratase [EC:4.2.1.45]	1	0	2	0
K12452 - CDP-6-deoxy-D-xylo-4-hexulose-3-dehydrase	0	1	0	0
K00523 - CDP-4-dehydro-6-deoxyglucose reductase [EC:1.17.1.1]	2	2	3	0
K12453 - CDP-paratose synthetase [EC:1.-.-.-]	0	0	1	0
K12454 - CDP-paratose 2-epimerase [EC:5.1.3.10]	2	2	2	6
K00656 - formate C-acetyltransferase [EC:2.3.1.54]	2	4	7	20
K00132 - acetaldehyde dehydrogenase (acetylating) [EC:1.2.1.10]	1	1	2	0
K04021 - aldehyde dehydrogenase	0	2	0	0
K00925 - acetate kinase [EC:2.7.2.1]	3	3	7	1
K00625 - phosphate acetyltransferase [EC:2.3.1.8]	2	1	2	3
K01962 - acetyl-CoA carboxylase carboxyl transferase subunit alpha [EC:6.4.1.2]	4	4	7	4
K02160 - acetyl-CoA carboxylase biotin carboxyl carrier protein	0	1	3	2
K01961 - acetyl-CoA carboxylase, biotin carboxylase subunit [EC:6.4.1.2 6.3.4.14]	14	9	13	17
K01963 - acetyl-CoA carboxylase carboxyl transferase subunit beta [EC:6.4.1.2]	2	2	9	11
K01512 - acylphosphatase [EC:3.6.1.7]	2	1	5	3
K01067 - acetyl-CoA hydrolase [EC:3.1.2.1]	1	3	5	11
K01026 - propionate CoA-transferase [EC:2.8.3.1]	0	1	2	2
K00101 - L-lactate dehydrogenase (cytochrome) [EC:1.1.2.3]	0	0	2	0
K00467 - lactate 2-monooxygenase [EC:1.13.12.4]	0	0	1	0
K03777 - D-lactate dehydrogenase [EC:1.1.1.28]	1	0	0	0
K03778 - D-lactate dehydrogenase [EC:1.1.1.28]	2	2	1	0
K00102 - D-lactate dehydrogenase (cytochrome) [EC:1.1.2.4]	1	6	5	3
K01759 - lactoylglutathione lyase [EC:4.4.1.5]	3	5	2	8
K01069 - hydroxyacylglutathione hydrolase [EC:3.1.2.6]	12	8	17	7
K01734 - methylglyoxal synthase [EC:4.2.3.3]	0	2	0	4
K00027 - malate dehydrogenase (oxaloacetate-decarboxylating) [EC:1.1.1.38]	3	11	9	21
K00029 - malate dehydrogenase (oxaloacetate-decarboxylating)(NADP+) [EC:1.1.1.40]	4	13	25	0
K01571 - oxaloacetate decarboxylase, alpha subunit [EC:4.1.1.3]	3	2	6	10
K01572 - oxaloacetate decarboxylase, beta subunit [EC:4.1.1.3]	2	3	7	4
K00116 - malate dehydrogenase (quinone) [EC:1.1.5.4]	1	2	0	0
K01595 - phosphoenolpyruvate carboxylase [EC:4.1.1.31]	4	7	6	10
K01006 - pyruvate,orthophosphate dikinase [EC:2.7.9.1]	22	11	24	35
K01007 - pyruvate, water dikinase [EC:2.7.9.2]	12	20	37	23
K01638 - malate synthase [EC:2.3.3.9]	5	3	5	2
K00626 - acetyl-CoA C-acetyltransferase [EC:2.3.1.9]	19	17	62	66
K01649 - 2-isopropylmalate synthase [EC:2.3.3.13]	21	11	30	15
K01655 - homocitrate synthase [EC:2.3.3.14]	2	1	0	1
K02594 - homocitrate synthase NifV [EC:2.3.3.14]	1	0	7	5
K01637 - isocitrate lyase [EC:4.1.3.1]	2	2	2	1
K08691 - malyl-CoA lyase [EC:4.1.3.24]	0	0	1	0
K14067 - malate-CoA ligase subunit beta [EC:6.2.1.9]	0	0	1	0
K00023 - acetoacetyl-CoA reductase [EC:1.1.1.36]	1	1	2	0
K01715 - 3-hydroxybutyryl-CoA dehydratase [EC:4.2.1.55]	3	2	8	6
K05606 - methylmalonyl-CoA/ethylmalonyl-CoA epimerase [EC:5.1.99.1]	0	0	0	1
K01965 - propionyl-CoA carboxylase alpha chain [EC:6.4.1.3]	0	3	2	0
K01966 - propionyl-CoA carboxylase beta chain [EC:6.4.1.3]	15	9	23	34
K01847 - methylmalonyl-CoA mutase [EC:5.4.99.2]	3	5	2	3
K00104 - glycolate oxidase [EC:1.1.3.15]	12	4	27	30
K11472 - glycolate oxidase FAD binding subunit	6	2	2	0
K11473 - glycolate oxidase iron-sulfur subunit	9	7	12	7
K01091 - phosphoglycolate phosphatase [EC:3.1.3.18]	5	5	5	5
K01601 - ribulose-bisphosphate carboxylase large chain [EC:4.1.1.39]	2	2	3	0
K01602 - ribulose-bisphosphate carboxylase small chain [EC:4.1.1.39]	0	1	1	0
K00830 - alanine-glyoxylate transaminase / serine-glyoxylate transaminase / serine-pyruvate transaminase [EC:2.6.1.44 2.6.1.45 2.6.1.51]	4	5	1	0
K00284 - glutamate synthase (ferredoxin) [EC:1.4.7.1]	3	8	5	0
K01915 - glutamine synthetase [EC:6.3.1.2]	24	21	42	33
K00600 - glycine hydroxymethyltransferase [EC:2.1.2.1]	19	8	29	31
K02437 - glycine cleavage system H protein	7	2	14	12
K01608 - tartronate-semialdehyde synthase [EC:4.1.1.47]	1	0	0	0
K01816 - hydroxypyruvate isomerase [EC:5.3.1.22]	3	2	3	4
K00042 - 2-hydroxy-3-oxopropionate reductase [EC:1.1.1.60]	1	2	1	1
K00865 - glycerate kinase [EC:2.7.1.31]	1	1	0	0
K00015 - glyoxylate reductase [EC:1.1.1.26]	2	2	7	13
K00018 - glycerate dehydrogenase [EC:1.1.1.29]	0	1	1	0
K00050 - hydroxypyruvate reductase [EC:1.1.1.81]	1	6	8	8
K03780 - L(+)-tartrate dehydratase beta subunit [EC:4.2.1.32]	0	1	0	0
K07246 - tartrate dehydrogenase/decarboxylase / D-malate dehydrogenase [EC:1.1.1.93 4.1.1.73 1.1.1.83]	0	1	3	0
K00122 - formate dehydrogenase [EC:1.2.1.2]	1	4	8	16
K00125 - formate dehydrogenase, beta subunit [EC:1.2.1.2]	0	0	0	3
K00123 - formate dehydrogenase, alpha subunit [EC:1.2.1.2]	18	23	41	47
K00124 - formate dehydrogenase, beta subunit	0	5	10	16
K00127 - formate dehydrogenase, gamma subunit	2	0	5	6
K07130 - arylformamidase [EC:3.5.1.9]	3	4	8	5
K01433 - formyltetrahydrofolate deformylase [EC:3.5.1.10]	2	0	1	0
K01455 - formamidase [EC:3.5.1.49]	0	0	0	2
K01458 - N-formylglutamate deformylase [EC:3.5.1.68]	0	3	1	0
K01577 - oxalyl-CoA decarboxylase [EC:4.1.1.8]	0	0	1	0
K01034 - acetate CoA-transferase alpha subunit [EC:2.8.3.8]	1	0	0	0
K01908 - propionyl-CoA synthetase [EC:6.2.1.17]	2	2	13	1
K00249 - acyl-CoA dehydrogenase [EC:1.3.8.7]	16	6	30	7
K00224 - [EC:1.3.1.-]	0	1	0	1
K01692 - enoyl-CoA hydratase [EC:4.2.1.17]	19	21	28	4
K01782 - 3-hydroxyacyl-CoA dehydrogenase / enoyl-CoA hydratase / 3-hydroxybutyryl-CoA epimerase [EC:1.1.1.35 4.2.1.17 5.1.2.3]	2	0	3	3
K01913 - [EC:6.2.1.-]	2	2	2	0
K05605 - 3-hydroxyisobutyryl-CoA hydrolase [EC:3.1.2.4]	0	0	1	0
K00823 - 4-aminobutyrate aminotransferase [EC:2.6.1.19]	8	8	8	18
K07250 - 4-aminobutyrate aminotransferase / (S)-3-amino-2-methylpropionate transaminase [EC:2.6.1.19 2.6.1.22]	2	0	6	1
K00822 - beta-alanine--pyruvate transaminase [EC:2.6.1.18]	0	0	1	0
K01849 - methylmalonyl-CoA mutase, C-terminal domain [EC:5.4.99.2]	1	1	10	5
K01848 - methylmalonyl-CoA mutase, N-terminal domain [EC:5.4.99.2]	9	15	37	41
K11942 - methylmalonyl-CoA mutase [EC:5.4.99.2]	0	4	3	0
K00140 - malonate-semialdehyde dehydrogenase (acetylating) / methylmalonate-semialdehyde dehydrogenase [EC:1.2.1.18 1.2.1.27]	3	3	9	12
K01720 - 2-methylcitrate dehydratase [EC:4.2.1.79]	3	1	4	0
K03417 - methylisocitrate lyase [EC:4.1.3.30]	1	1	0	1
K00074 - 3-hydroxybutyryl-CoA dehydrogenase [EC:1.1.1.157]	9	13	24	16
K00248 - butyryl-CoA dehydrogenase [EC:1.3.8.1]	5	5	17	22
K00929 - butyrate kinase [EC:2.7.2.7]	4	2	2	1
K00634 - phosphate butyryltransferase [EC:2.3.1.19]	1	1	2	2
K03821 - polyhydroxyalkanoate synthase [EC:2.3.1.-]	2	3	2	0
K05973 - poly(3-hydroxybutyrate) depolymerase [EC:3.1.1.75]	0	1	0	0
K01615 - glutaconyl-CoA decarboxylase [EC:4.1.1.70]	0	0	3	0
K01726 - [EC:4.2.1.-]	3	2	6	9
K01039 - glutaconate CoA-transferase, subunit A [EC:2.8.3.12]	3	2	14	18
K01040 - glutaconate CoA-transferase, subunit B [EC:2.8.3.12]	0	6	8	9
K00109 - 2-hydroxyglutarate dehydrogenase [EC:1.1.99.2]	0	0	2	0
K01799 - maleate isomerase [EC:5.2.1.1]	0	0	1	0
K00135 - succinate-semialdehyde dehydrogenase (NADP+) [EC:1.2.1.16]	6	3	13	2
K01640 - hydroxymethylglutaryl-CoA lyase [EC:4.1.3.4]	7	2	5	3
K01028 - 3-oxoacid CoA-transferase subunit A [EC:2.8.3.5]	0	1	2	3
K01029 - 3-oxoacid CoA-transferase subunit B [EC:2.8.3.5]	0	2	9	6
K01907 - acetoacetyl-CoA synthetase [EC:6.2.1.16]	5	1	5	3
K00019 - 3-hydroxybutyrate dehydrogenase [EC:1.1.1.30]	1	2	2	1
K01652 - acetolactate synthase I/II/III large subunit [EC:2.2.1.6]	18	13	21	17
K01653 - acetolactate synthase I/III small subunit [EC:2.2.1.6]	6	3	3	2
K03366 - (R,R)-butanediol dehydrogenase / diacetyl reductase [EC:1.1.1.4 1.1.1.303]	1	0	0	2
K01846 - methylaspartate mutase [EC:5.4.99.1]	0	0	0	2
K01703 - 3-isopropylmalate/(R)-2-methylmalate dehydratase large subunit [EC:4.2.1.33 4.2.1.35]	9	10	12	15
K01704 - 3-isopropylmalate/(R)-2-methylmalate dehydratase small subunit [EC:4.2.1.33 4.2.1.35]	6	6	9	6
K01114 - phospholipase C [EC:3.1.4.3]	1	0	1	0
K01092 - myo-inositol-1(or 4)-monophosphatase [EC:3.1.3.25]	3	7	16	13
K01858 - myo-inositol-1-phosphate synthase [EC:5.5.1.4]	5	3	10	23
K01083 - 3-phytase [EC:3.1.3.8]	0	0	2	0
K00010 - myo-inositol 2-dehydrogenase [EC:1.1.1.18]	2	3	11	3
K06606 - inosose isomerase [EC:5.3.99.-]	1	0	2	1
K03335 - inosose dehydratase [EC:4.2.1.44]	2	0	1	2
K03336 - 3D-(3,5/4)-trihydroxycyclohexane-1,2-dione hydrolase [EC:3.7.1.-]	1	2	0	2
K03337 - 5-deoxy-glucuronate isomerase [EC:5.3.1.-]	1	1	0	0
K03338 - 5-dehydro-2-deoxygluconokinase [EC:2.7.1.92]	2	1	0	0
K00329 - NADH dehydrogenase [EC:1.6.5.3]	3	5	4	10
K00330 - NADH-quinone oxidoreductase subunit A [EC:1.6.5.3]	1	2	3	1
K00331 - NADH-quinone oxidoreductase subunit B [EC:1.6.5.3]	9	2	0	10
K00332 - NADH-quinone oxidoreductase subunit C [EC:1.6.5.3]	6	5	3	9
K00333 - NADH-quinone oxidoreductase subunit D [EC:1.6.5.3]	10	14	13	19
K13378 - NADH-quinone oxidoreductase subunit C/D [EC:1.6.5.3]	2	0	0	1
K00334 - NADH-quinone oxidoreductase subunit E [EC:1.6.5.3]	4	10	10	4
K00335 - NADH-quinone oxidoreductase subunit F [EC:1.6.5.3]	19	12	30	22
K00336 - NADH-quinone oxidoreductase subunit G [EC:1.6.5.3]	8	14	12	8
K00337 - NADH-quinone oxidoreductase subunit H [EC:1.6.5.3]	16	12	8	21
K00338 - NADH-quinone oxidoreductase subunit I [EC:1.6.5.3]	4	4	8	5
K00339 - NADH-quinone oxidoreductase subunit J [EC:1.6.5.3]	5	3	3	4
K00340 - NADH-quinone oxidoreductase subunit K [EC:1.6.5.3]	5	3	11	7
K00341 - NADH-quinone oxidoreductase subunit L [EC:1.6.5.3]	20	16	10	10
K00342 - NADH-quinone oxidoreductase subunit M [EC:1.6.5.3]	12	8	17	45
K00343 - NADH-quinone oxidoreductase subunit N [EC:1.6.5.3]	14	15	7	20
K05573 - NAD(P)H-quinone oxidoreductase subunit 2 [EC:1.6.5.3]	0	1	0	0
K05574 - NAD(P)H-quinone oxidoreductase subunit 3 [EC:1.6.5.3]	1	0	0	2
K05575 - NAD(P)H-quinone oxidoreductase subunit 4 [EC:1.6.5.3]	0	0	1	0
K05577 - NAD(P)H-quinone oxidoreductase subunit 5 [EC:1.6.5.3]	4	3	2	6
K05578 - NAD(P)H-quinone oxidoreductase subunit 6 [EC:1.6.5.3]	0	0	0	1
K05580 - NAD(P)H-quinone oxidoreductase subunit I [EC:1.6.5.3]	0	0	0	1
K05581 - NAD(P)H-quinone oxidoreductase subunit J [EC:1.6.5.3]	0	1	0	0
K05582 - NAD(P)H-quinone oxidoreductase subunit K [EC:1.6.5.3]	0	1	0	0
K05584 - NAD(P)H-quinone oxidoreductase subunit M [EC:1.6.5.3]	0	1	0	0
K05586 - bidirectional [NiFe] hydrogenase diaphorase subunit [EC:1.6.5.3]	0	1	1	1
K05587 - bidirectional [NiFe] hydrogenase diaphorase subunit [EC:1.6.5.3]	1	0	2	0
K05588 - bidirectional [NiFe] hydrogenase diaphorase subunit [EC:1.6.5.3]	1	0	0	4
K03883 - NADH-ubiquinone oxidoreductase chain 5 [EC:1.6.5.3]	0	1	0	0
K03936 - NADH dehydrogenase (ubiquinone) Fe-S protein 3 [EC:1.6.5.3 1.6.99.3]	0	0	0	1
K03940 - NADH dehydrogenase (ubiquinone) Fe-S protein 7 [EC:1.6.5.3 1.6.99.3]	0	1	0	0
K03943 - NADH dehydrogenase (ubiquinone) flavoprotein 2 [EC:1.6.5.3 1.6.99.3]	1	1	0	0
K00356 - NADH dehydrogenase [EC:1.6.99.3]	5	1	6	7
K03885 - NADH dehydrogenase [EC:1.6.99.3]	3	8	8	3
K05903 - NADH dehydrogenase (quinone) [EC:1.6.99.5]	1	6	14	16
K00411 - ubiquinol-cytochrome c reductase iron-sulfur subunit [EC:1.10.2.2]	1	0	0	0
K00412 - ubiquinol-cytochrome c reductase cytochrome b subunit	0	1	1	1
K00413 - ubiquinol-cytochrome c reductase cytochrome c1 subunit	0	1	0	0
K03887 - menaquinol-cytochrome c reductase cytochrome b subunit	1	1	1	2
K03888 - menaquinol-cytochrome c reductase cytochrome b/c subunit	0	0	0	1
K03889 - ubiquinol-cytochrome c reductase cytochrome c subunit	0	1	0	0
K03891 - ubiquinol-cytochrome c reductase cytochrome b subunit	1	0	1	0
K02301 - protoheme IX farnesyltransferase [EC:2.5.1.-]	3	3	0	1
K02276 - cytochrome c oxidase subunit III [EC:1.9.3.1]	6	3	4	1
K02274 - cytochrome c oxidase subunit I [EC:1.9.3.1]	11	12	9	1
K02275 - cytochrome c oxidase subunit II [EC:1.9.3.1]	7	3	5	0
K02258 - cytochrome c oxidase assembly protein subunit 11	0	1	0	0
K02259 - cytochrome c oxidase assembly protein subunit 15	3	1	5	0
K00404 - cytochrome c oxidase cbb3-type subunit I [EC:1.9.3.1]	4	1	1	1
K00405 - cytochrome c oxidase cbb3-type subunit II	4	4	0	1
K00406 - cytochrome c oxidase cbb3-type subunit III	2	1	3	0
K02299 - cytochrome o ubiquinol oxidase subunit III [EC:1.10.3.-]	0	0	1	0
K00425 - cytochrome d ubiquinol oxidase subunit I [EC:1.10.3.-]	2	5	4	4
K00426 - cytochrome d ubiquinol oxidase subunit II [EC:1.10.3.-]	6	5	4	1
K02114 - F-type H+-transporting ATPase subunit epsilon [EC:3.6.3.14]	6	2	4	5
K02112 - F-type H+-transporting ATPase subunit beta [EC:3.6.3.14]	9	10	8	21
K02115 - F-type H+-transporting ATPase subunit gamma [EC:3.6.3.14]	5	3	9	19
K02111 - F-type H+-transporting ATPase subunit alpha [EC:3.6.3.14]	9	12	9	17
K02113 - F-type H+-transporting ATPase subunit delta [EC:3.6.3.14]	1	2	3	4
K02109 - F-type H+-transporting ATPase subunit b [EC:3.6.3.14]	3	0	2	3
K02110 - F-type H+-transporting ATPase subunit c [EC:3.6.3.14]	1	3	4	2
K02108 - F-type H+-transporting ATPase subunit a [EC:3.6.3.14]	9	3	1	9
K02119 - V-type H+-transporting ATPase subunit C [EC:3.6.3.14]	2	0	11	0
K02122 - V-type H+-transporting ATPase subunit F [EC:3.6.3.14]	0	0	1	1
K02117 - V-type H+-transporting ATPase subunit A [EC:3.6.3.14]	4	7	20	4
K02118 - V-type H+-transporting ATPase subunit B [EC:3.6.3.14]	5	3	8	8
K02121 - V-type H+-transporting ATPase subunit E [EC:3.6.3.14]	2	2	3	0
K02124 - V-type H+-transporting ATPase subunit K [EC:3.6.3.14]	0	1	3	3
K02123 - V-type H+-transporting ATPase subunit I [EC:3.6.3.14]	1	1	13	5
K02120 - V-type H+-transporting ATPase subunit D [EC:3.6.3.14]	3	0	6	4
K01535 - H+-transporting ATPase [EC:3.6.3.6]	0	0	0	1
K01507 - inorganic pyrophosphatase [EC:3.6.1.1]	19	14	43	34
K06019 - pyrophosphatase PpaX [EC:3.6.1.1]	0	0	2	0
K11725 - phospholysine phosphohistidine inorganic pyrophosphate phosphatase [EC:3.6.1.1 3.1.3.-]	0	1	0	0
K00937 - polyphosphate kinase [EC:2.7.4.1]	6	11	5	2
K02703 - photosystem II P680 reaction center D1 protein	0	1	0	0
K02704 - photosystem II CP47 chlorophyll apoprotein	0	1	0	0
K02705 - photosystem II CP43 chlorophyll apoprotein	0	1	0	0
K02707 - photosystem II cytochrome b559 subunit alpha	0	0	1	0
K02712 - photosystem II PsbK protein	0	1	0	0
K02717 - photosystem II oxygen-evolving enhancer protein 2	0	1	0	0
K02720 - photosystem II cytochrome c550	0	1	0	0
K02689 - photosystem I P700 chlorophyll a apoprotein A1	0	2	0	0
K02690 - photosystem I P700 chlorophyll a apoprotein A2	0	2	0	1
K02692 - photosystem I subunit II	0	1	0	0
K02635 - cytochrome b6	0	1	0	0
K02636 - cytochrome b6-f complex iron-sulfur subunit [EC:1.10.9.1]	3	4	0	1
K02639 - ferredoxin	0	1	0	0
K02641 - ferredoxin--NADP+ reductase [EC:1.18.1.2]	1	1	0	0
K02286 - phycocyanin-associated rod linker protein	0	2	0	0
K02288 - phycocyanobilin lyase alpha subunit [EC:4.-.-.-]	0	2	0	0
K00855 - phosphoribulokinase [EC:2.7.1.19]	3	1	1	2
K01632 - fructose-6-phosphate phosphoketolase [EC:4.1.2.22]	0	1	0	0
K00814 - alanine transaminase [EC:2.6.1.2]	0	0	0	1
K03737 - putative pyruvate-flavodoxin oxidoreductase [EC:1.2.7.-]	12	14	10	5
K07516 - 3-hydroxyacyl-CoA dehydrogenase [EC:1.1.1.35]	16	12	25	4
K09709 - mesaconyl-C4 CoA hydratase	0	0	2	1
K01938 - formate--tetrahydrofolate ligase [EC:6.3.4.3]	7	2	24	21
K01491 - methylenetetrahydrofolate dehydrogenase (NADP+) / methenyltetrahydrofolate cyclohydrolase [EC:1.5.1.5 3.5.4.9]	7	8	14	8
K00297 - methylenetetrahydrofolate reductase (NADPH) [EC:1.5.1.20]	2	3	11	10
K14138 - carbon monoxide dehydrogenase / acetyl-CoA synthase subunit alpha [EC:1.2.7.4 1.2.99.2 2.3.1.169]	0	1	3	0
K03782 - catalase-peroxidase [EC:1.11.1.21]	7	10	9	3
K00148 - glutathione-independent formaldehyde dehydrogenase [EC:1.2.1.46]	0	1	0	0
K01070 - S-formylglutathione hydrolase [EC:3.1.2.12]	0	2	0	0
K00436 - hydrogen dehydrogenase [EC:1.12.1.2]	6	6	20	26
K00532 - ferredoxin hydrogenase [EC:1.12.7.2]	0	0	0	1
K00192 - acetyl-CoA decarbonylase/synthase complex subunit alpha [EC:1.2.99.2]	0	0	3	1
K00197 - acetyl-CoA decarbonylase/synthase complex subunit gamma [EC:2.1.1.245]	2	4	12	8
K00194 - acetyl-CoA decarbonylase/synthase complex subunit delta [EC:2.1.1.245]	3	0	10	5
K00195 - acetyl-CoA decarbonylase/synthase complex subunit epsilon	0	0	1	1
K00198 - carbon-monoxide dehydrogenase catalytic subunit [EC:1.2.99.2]	8	5	23	19
K00196 - carbon-monoxide dehydrogenase iron sulfur subunit	0	0	1	0
K03518 - carbon-monoxide dehydrogenase small subunit [EC:1.2.99.2]	4	4	11	16
K03519 - carbon-monoxide dehydrogenase medium subunit [EC:1.2.99.2]	5	7	9	10
K03520 - carbon-monoxide dehydrogenase large subunit [EC:1.2.99.2]	4	1	10	1
K00317 - trimethylamine dehydrogenase [EC:1.5.8.2]	0	1	0	0
K00200 - formylmethanofuran dehydrogenase subunit A [EC:1.2.99.5]	1	0	2	0
K00201 - formylmethanofuran dehydrogenase subunit B [EC:1.2.99.5]	0	0	0	2
K00202 - formylmethanofuran dehydrogenase subunit C [EC:1.2.99.5]	1	0	1	0
K00203 - formylmethanofuran dehydrogenase subunit D [EC:1.2.99.5]	0	0	0	1
K00205 - formylmethanofuran dehydrogenase subunit F [EC:1.2.99.5]	0	0	1	2
K11260 - formylmethanofuran dehydrogenase subunit G [EC:1.2.99.5]	0	1	0	1
K11261 - formylmethanofuran dehydrogenase subunit E [EC:1.2.99.5]	0	0	6	11
K00672 - formylmethanofuran--tetrahydromethanopterin N-formyltransferase [EC:2.3.1.101]	0	1	3	2
K01499 - methenyltetrahydromethanopterin cyclohydrolase [EC:3.5.4.27]	0	1	2	0
K00319 - methylenetetrahydromethanopterin dehydrogenase [EC:1.5.99.9]	0	0	0	1
K00441 - coenzyme F420 hydrogenase beta subunit [EC:1.12.98.1]	2	2	1	2
K00442 - coenzyme F420 hydrogenase delta subunit	0	1	0	0
K00443 - coenzyme F420 hydrogenase gamma subunit [EC:1.12.98.1]	0	0	2	1
K10714 - methylene-tetrahydromethanopterin dehydrogenase [EC:1.5.1.-]	1	0	1	0
K10713 - formaldehyde-activating enzyme [EC:4.3.-.-]	0	0	4	5
K00320 - coenzyme F420-dependent N5,N10-methenyltetrahydromethanopterin reductase [EC:1.5.99.11]	7	1	2	1
K00577 - tetrahydromethanopterin S-methyltransferase subunit A [EC:2.1.1.86]	0	0	1	0
K00578 - tetrahydromethanopterin S-methyltransferase subunit B [EC:2.1.1.86]	0	0	0	1
K00579 - tetrahydromethanopterin S-methyltransferase subunit C [EC:2.1.1.86]	0	0	1	0
K00584 - tetrahydromethanopterin S-methyltransferase subunit H [EC:2.1.1.86]	0	0	3	0
K00399 - methyl-coenzyme M reductase alpha subunit [EC:2.8.4.1]	0	0	0	1
K03388 - heterodisulfide reductase subunit A [EC:1.8.98.1]	31	31	121	193
K03389 - heterodisulfide reductase subunit B [EC:1.8.98.1]	7	2	25	30
K03390 - heterodisulfide reductase subunit C [EC:1.8.98.1]	6	2	27	21
K08264 - heterodisulfide reductase subunit D [EC:1.8.98.1]	3	1	10	13
K08097 - phosphosulfolactate synthase [EC:4.4.1.19]	0	0	1	0
K05979 - 2-phosphosulfolactate phosphatase [EC:3.1.3.71]	1	0	1	5
K05884 - (R)-2-hydroxyacid dehydrogenase [EC:1.1.1.272]	3	0	5	9
K00058 - D-3-phosphoglycerate dehydrogenase [EC:1.1.1.95]	17	17	26	16
K00831 - phosphoserine aminotransferase [EC:2.6.1.52]	2	5	4	2
K01079 - phosphoserine phosphatase [EC:3.1.3.3]	1	3	7	2
K02203 - phosphoserine / homoserine phosphotransferase [EC:3.1.3.3 2.7.1.39]	0	0	0	1
K14080 - [methyl-Co(III) methanol-specific corrinoid protein]:coenzyme M methyltransferase [EC:2.1.1.246]	0	0	0	1
K04480 - methanol---5-hydroxybenzimidazolylcobamide Co-methyltransferase [EC:2.1.1.90]	2	1	0	1
K14081 - methanol corrinoid protein	0	0	0	1
K14083 - trimethylamine---corrinoid protein Co-methyltransferase [EC:2.1.1.250]	3	8	9	33
K14084 - trimethylamine corrinoid protein	0	1	0	6
K03313 - Na+:H+ antiporter, NhaA family	3	2	0	0
K03315 - Na+:H+ antiporter, NhaC family	2	0	3	0
K14086 - ech hydrogenase subunit A	0	0	0	1
K14088 - ech hydrogenase subunit C	1	0	0	2
K14090 - ech hydrogenase subunit E	2	0	0	1
K14091 - ech hydrogenase subunit F	2	0	0	0
K14097 - energy-converting hydrogenase A subunit F	0	0	0	1
K14101 - energy-converting hydrogenase A subunit J	0	0	0	1
K14107 - energy-converting hydrogenase A subunit P	0	0	0	1
K14109 - energy-converting hydrogenase A subunit R	0	0	7	0
K14122 - energy-converting hydrogenase B subunit M	1	0	0	0
K14123 - energy-converting hydrogenase B subunit N	0	0	0	1
K14124 - energy-converting hydrogenase B subunit O	0	0	0	1
K14126 - F420-non-reducing hydrogenase subunit A [EC:1.12.99.-]	0	0	0	1
K14127 - F420-non-reducing hydrogenase iron-sulfur subunit D [EC:1.12.99.-]	0	1	1	5
K14128 - F420-non-reducing hydrogenase subunit G [EC:1.12.99.-]	0	0	2	0
K11212 - LPPG:FO 2-phospho-L-lactate transferase [EC:2.7.8.28]	2	1	4	3
K12234 - coenzyme F420-0:L-glutamate ligase / coenzyme F420-1:gamma-L-glutamate ligase [EC:6.3.2.31 6.3.2.34]	1	1	6	1
K00926 - carbamate kinase [EC:2.7.2.2]	1	6	6	3
K01948 - carbamoyl-phosphate synthase (ammonia) [EC:6.3.4.16]	0	1	0	0
K01725 - cyanate lyase [EC:4.2.1.104]	0	1	0	0
K01673 - carbonic anhydrase [EC:4.2.1.1]	3	2	3	5
K00605 - aminomethyltransferase [EC:2.1.2.10]	9	6	21	18
K01744 - aspartate ammonia-lyase [EC:4.3.1.1]	7	1	0	3
K01914 - aspartate--ammonia ligase [EC:6.3.1.1]	0	1	1	3
K01424 - L-asparaginase [EC:3.5.1.1]	3	4	3	7
K05601 - hydroxylamine reductase [EC:1.7.99.1]	2	0	0	0
K10535 - hydroxylamine oxidase [EC:1.7.3.4]	2	1	3	0
K00459 - nitronate monooxygenase [EC:1.13.12.16]	5	2	5	4
K00370 - nitrate reductase 1, alpha subunit [EC:1.7.99.4]	13	1	8	0
K00371 - nitrate reductase 1, beta subunit [EC:1.7.99.4]	2	3	3	0
K00374 - nitrate reductase 1, gamma subunit [EC:1.7.99.4]	2	1	1	2
K00372 - nitrate reductase catalytic subunit [EC:1.7.99.4]	1	1	2	1
K02567 - periplasmic nitrate reductase NapA [EC:1.7.99.4]	1	1	1	0
K00362 - nitrite reductase (NAD(P)H) large subunit [EC:1.7.1.4]	3	5	6	6
K00366 - ferredoxin-nitrite reductase [EC:1.7.7.1]	3	3	1	0
K03385 - cytochrome c-552 [EC:1.7.2.2]	5	3	9	3
K00368 - nitrite reductase (NO-forming) [EC:1.7.2.1]	2	1	1	1
K04561 - nitric oxide reductase subunit B [EC:1.7.2.5]	0	1	3	0
K02305 - nitric oxide reductase subunit C	1	1	1	0
K00376 - nitrous-oxide reductase [EC:1.7.2.4]	1	2	2	0
K02586 - nitrogenase molybdenum-iron protein alpha chain [EC:1.18.6.1]	3	0	0	3
K02591 - nitrogenase molybdenum-iron protein beta chain [EC:1.18.6.1]	1	3	2	1
K02588 - nitrogenase iron protein NifH [EC:1.18.6.1]	2	2	1	1
K03839 - flavodoxin I	0	1	0	1
K00260 - glutamate dehydrogenase [EC:1.4.1.2]	4	4	7	0
K00261 - glutamate dehydrogenase (NAD(P)+) [EC:1.4.1.3]	11	9	26	21
K00262 - glutamate dehydrogenase (NADP+) [EC:1.4.1.4]	2	4	4	3
K01425 - glutaminase [EC:3.5.1.2]	0	1	0	0
K00265 - glutamate synthase (NADPH/NADH) large chain [EC:1.4.1.13 1.4.1.14]	14	7	21	8
K00266 - glutamate synthase (NADPH/NADH) small chain [EC:1.4.1.13 1.4.1.14]	16	16	30	26
K01953 - asparagine synthase (glutamine-hydrolysing) [EC:6.3.5.4]	21	13	26	18
K01501 - nitrilase [EC:3.5.5.1]	3	4	2	0
K02569 - cytochrome c-type protein NapC	1	0	0	0
K02574 - ferredoxin-type protein NapH	0	1	2	3
K03521 - electron transfer flavoprotein beta subunit	6	13	29	15
K03522 - electron transfer flavoprotein alpha subunit	5	11	32	14
K00313 - electron transfer flavoprotein-quinone oxidoreductase [EC:1.5.5.-]	0	1	1	0
K04014 - protein NrfC	0	2	0	0
K04015 - protein NrfD	1	0	2	7
K00955 - bifunctional enzyme CysN/CysC [EC:2.7.7.4 2.7.1.25]	1	0	0	0
K00860 - adenylylsulfate kinase [EC:2.7.1.25]	1	1	0	1
K00956 - sulfate adenylyltransferase subunit 1 [EC:2.7.7.4]	1	2	0	0
K00957 - sulfate adenylyltransferase subunit 2 [EC:2.7.7.4]	1	0	3	0
K00958 - sulfate adenylyltransferase [EC:2.7.7.4]	7	3	5	5
K00395 - adenylylsulfate reductase, subunit B [EC:1.8.99.2]	1	0	0	2
K00394 - adenylylsulfate reductase, subunit A [EC:1.8.99.2]	2	0	2	8
K00390 - phosphoadenosine phosphosulfate reductase [EC:1.8.4.8]	2	2	2	0
K00381 - sulfite reductase (NADPH) hemoprotein beta-component [EC:1.8.1.2]	4	1	1	0
K00380 - sulfite reductase (NADPH) flavoprotein alpha-component [EC:1.8.1.2]	0	2	1	0
K01082 - 3'(2'), 5'-bisphosphate nucleotidase [EC:3.1.3.7]	0	0	1	1
K01015 - alcohol sulfotransferase [EC:2.8.2.2]	0	0	1	0
K00387 - sulfite oxidase [EC:1.8.3.1]	0	1	0	0
K05301 - sulfite dehydrogenase [EC:1.8.2.1]	0	2	2	0
K00392 - sulfite reductase (ferredoxin) [EC:1.8.7.1]	0	1	1	0
K01760 - cystathionine beta-lyase [EC:4.4.1.8]	1	0	1	0
K01739 - cystathionine gamma-synthase [EC:2.5.1.48]	7	5	4	7
K00651 - homoserine O-succinyltransferase [EC:2.3.1.46]	0	0	1	0
K00641 - homoserine O-acetyltransferase [EC:2.3.1.31]	3	3	4	2
K00640 - serine O-acetyltransferase [EC:2.3.1.30]	6	4	10	3
K01738 - cysteine synthase A [EC:2.5.1.47]	2	4	13	9
K12339 - cysteine synthase B [EC:2.5.1.47]	1	1	4	3
K11263 - acetyl-/propionyl-CoA carboxylase, biotin carboxylase, biotin carboxyl carrier protein [EC:6.3.4.14]	1	0	0	3
K00645 - [acyl-carrier-protein] S-malonyltransferase [EC:2.3.1.39]	5	1	13	11
K00647 - 3-oxoacyl-[acyl-carrier-protein] synthase I [EC:2.3.1.41]	0	2	2	0
K09458 - 3-oxoacyl-[acyl-carrier-protein] synthase II [EC:2.3.1.179]	19	13	21	21
K00648 - 3-oxoacyl-[acyl-carrier-protein] synthase III [EC:2.3.1.180]	14	8	21	22
K00059 - 3-oxoacyl-[acyl-carrier protein] reductase [EC:1.1.1.100]	20	28	50	36
K01716 - 3-hydroxyacyl-[acyl-carrier-protein] dehydratase [EC:4.2.1.59]	0	1	0	0
K02372 - 3-hydroxyacyl-[acyl-carrier-protein] dehydratase [EC:4.2.1.59]	3	3	9	5
K00208 - enoyl-[acyl-carrier protein] reductase I [EC:1.3.1.9]	3	4	5	0
K02371 - enoyl-[acyl carrier protein] reductase II [EC:1.3.1.-]	1	1	4	2
K10780 - enoyl-[acyl carrier protein] reductase III [EC:1.3.1.-]	0	2	3	0
K07512 - mitochondrial trans-2-enoyl-CoA reductase [EC:1.3.1.38]	0	1	0	0
K00632 - acetyl-CoA acyltransferase [EC:2.3.1.16]	6	2	16	3
K13767 - enoyl-CoA hydratase [EC:4.2.1.17]	0	1	0	1
K00232 - acyl-CoA oxidase [EC:1.3.3.6]	0	1	0	0
K00255 - long-chain-acyl-CoA dehydrogenase [EC:1.3.8.8]	0	0	1	0
K06445 - acyl-CoA dehydrogenase [EC:1.3.99.-]	1	0	1	0
K00252 - glutaryl-CoA dehydrogenase [EC:1.3.8.6]	2	4	14	3
K01897 - long-chain acyl-CoA synthetase [EC:6.2.1.3]	36	32	81	52
K05939 - acyl-[acyl-carrier-protein]-phospholipid O-acyltransferase / long-chain-fatty-acid--[acyl-carrier-protein] ligase [EC:2.3.1.40 6.2.1.20]	2	4	2	1
K00529 - ferredoxin--NAD+ reductase [EC:1.18.1.3]	0	0	1	0
K05297 - rubredoxin-NAD+ reductase [EC:1.18.1.1]	1	1	1	0
K13356 - fatty acyl-CoA reductase [EC:1.2.1.-]	1	0	0	0
K01796 - alpha-methylacyl-CoA racemase [EC:5.1.99.4]	4	2	3	4
K12405 - 3-hydroxyacyl-CoA dehydrogenase / 3a,7a,12a-trihydroxy-5b-cholest-24-enoyl-CoA hydratase [EC:1.1.1.35 4.2.1.107]	0	0	1	1
K08764 - sterol carrier protein 2 [EC:2.3.1.176]	0	0	2	0
K00071 - corticosteroid 11-beta-dehydrogenase isozyme 2 [EC:1.1.1.-]	1	0	0	0
K00038 - 3alpha(or 20beta)-hydroxysteroid dehydrogenase [EC:1.1.1.53]	1	0	0	0
K01130 - arylsulfatase [EC:3.1.6.1]	0	4	4	2
K00044 - estradiol 17beta-dehydrogenase [EC:1.1.1.62]	0	0	0	1
K05878 - dihydroxyacetone kinase, N-terminal domain [EC:2.7.1.-]	0	1	3	10
K05879 - dihydroxyacetone kinase, C-terminal domain [EC:2.7.1.-]	0	0	0	8
K00005 - glycerol dehydrogenase [EC:1.1.1.6]	0	1	0	0
K00864 - glycerol kinase [EC:2.7.1.30]	6	4	11	21
K00631 - glycerol-3-phosphate O-acyltransferase [EC:2.3.1.15]	2	0	1	2
K03621 - glycerol-3-phosphate acyltransferase PlsX [EC:2.3.1.15]	8	1	17	16
K08591 - glycerol-3-phosphate acyltransferase PlsY [EC:2.3.1.15]	4	2	11	8
K00655 - 1-acyl-sn-glycerol-3-phosphate acyltransferase [EC:2.3.1.51]	6	8	11	12
K00901 - diacylglycerol kinase (ATP dependent) [EC:2.7.1.107]	2	1	3	4
K00635 - diacylglycerol O-acyltransferase [EC:2.3.1.20]	1	0	2	0
K01046 - triacylglycerol lipase [EC:3.1.1.3]	0	2	2	2
K01054 - acylglycerol lipase [EC:3.1.1.23]	0	5	5	4
K03429 - 1,2-diacylglycerol 3-glucosyltransferase [EC:2.4.1.157]	0	0	3	3
K03715 - 1,2-diacylglycerol 3-beta-galactosyltransferase [EC:2.4.1.46]	0	1	1	4
K00086 - 1,3-propanediol dehydrogenase [EC:1.1.1.202]	0	0	1	1
K13920 - propanediol dehydratase small subunit [EC:4.2.1.28]	1	0	0	0
K13922 - propionaldehyde dehydrogenase	1	0	0	0
K00057 - glycerol-3-phosphate dehydrogenase (NAD(P)+) [EC:1.1.1.94]	8	4	10	5
K00111 - glycerol-3-phosphate dehydrogenase [EC:1.1.5.3]	10	6	16	24
K00112 - glycerol-3-phosphate dehydrogenase subunit B [EC:1.1.5.3]	1	0	0	1
K00113 - glycerol-3-phosphate dehydrogenase subunit C [EC:1.1.5.3]	0	3	0	1
K00980 - glycerol-3-phosphate cytidylyltransferase [EC:2.7.7.39]	0	0	2	1
K01115 - phospholipase D [EC:3.1.4.4]	0	1	0	0
K01058 - phospholipase A1 [EC:3.1.1.32]	0	0	1	0
K01048 - lysophospholipase [EC:3.1.1.5]	0	1	0	2
K01126 - glycerophosphoryl diester phosphodiesterase [EC:3.1.4.46]	4	13	8	9
K04019 - ethanolamine utilization protein EutA	1	0	0	0
K00551 - phosphatidylethanolamine N-methyltransferase [EC:2.1.1.17]	2	0	0	1
K00570 - phosphatidylethanolamine/phosphatidyl-N-methylethanolamine N-methyltransferase [EC:2.1.1.17 2.1.1.71]	0	1	0	0
K00981 - phosphatidate cytidylyltransferase [EC:2.7.7.41]	4	2	7	7
K01004 - phosphatidylcholine synthase [EC:2.7.8.24]	0	0	1	0
K00998 - phosphatidylserine synthase [EC:2.7.8.8]	2	0	4	3
K01613 - phosphatidylserine decarboxylase [EC:4.1.1.65]	7	1	5	4
K00995 - CDP-diacylglycerol--glycerol-3-phosphate 3-phosphatidyltransferase [EC:2.7.8.5]	10	1	26	12
K01095 - phosphatidylglycerophosphatase A [EC:3.1.3.27]	1	1	4	1
K06131 - cardiolipin synthase [EC:2.7.8.-]	0	0	1	2
K06132 - putative cardiolipin synthase [EC:2.7.8.-]	2	0	2	0
K00803 - alkyldihydroxyacetonephosphate synthase [EC:2.5.1.26]	2	3	2	8
K12348 - acid ceramidase [EC:3.5.1.23]	0	0	1	0
K12349 - neutral ceramidase [EC:3.5.1.23]	0	0	1	0
K01634 - sphinganine-1-phosphate aldolase [EC:4.1.2.27]	1	0	6	8
K00720 - ceramide glucosyltransferase [EC:2.4.1.80]	0	1	4	1
K01201 - glucosylceramidase [EC:3.2.1.45]	1	0	0	1
K01134 - arylsulfatase A [EC:3.1.6.8]	1	0	1	0
K01186 - sialidase-1 [EC:3.2.1.18]	0	1	3	1
K00432 - glutathione peroxidase [EC:1.11.1.9]	2	3	0	0
K00681 - gamma-glutamyltranspeptidase [EC:2.3.2.2]	14	9	21	3
K05309 - microsomal prostaglandin-E synthase 2 [EC:5.3.99.3]	0	0	1	0
K00079 - carbonyl reductase 1 [EC:1.1.1.184 1.1.1.189 1.1.1.197]	0	0	1	0
K08726 - soluble epoxide hydrolase [EC:3.3.2.10]	0	0	0	1
K00508 - linoleoyl-CoA desaturase [EC:1.14.19.3]	0	1	0	0
K00507 - stearoyl-CoA desaturase (delta-9 desaturase) [EC:1.14.19.1]	5	2	1	2
K10255 - omega-6 fatty acid desaturase (delta-12 desaturase) [EC:1.14.19.-]	2	2	0	0
K10804 - acyl-CoA thioesterase I [EC:3.1.2.- 3.1.1.5]	3	0	0	0
K10805 - acyl-CoA thioesterase II [EC:3.1.2.-]	1	0	0	0
K10806 - acyl-CoA thioesterase YciA [EC:3.1.2.-]	0	1	0	0
K01076 - [EC:3.1.2.-]	2	0	0	0
K01515 - ADP-ribose pyrophosphatase [EC:3.6.1.13]	8	4	14	7
K00764 - amidophosphoribosyltransferase [EC:2.4.2.14]	12	8	33	17
K11787 - phosphoribosylamine--glycine ligase / phosphoribosylglycinamide formyltransferase / phosphoribosylformylglycinamidine cyclo-ligase [EC:6.3.4.13 2.1.2.2 6.3.3.1]	0	1	0	0
K01945 - phosphoribosylamine--glycine ligase [EC:6.3.4.13]	6	6	29	15
K11175 - phosphoribosylglycinamide formyltransferase 1 [EC:2.1.2.2]	6	3	5	6
K01952 - phosphoribosylformylglycinamidine synthase [EC:6.3.5.3]	20	14	35	35
K01933 - phosphoribosylformylglycinamidine cyclo-ligase [EC:6.3.3.1]	6	4	17	4
K01589 - 5-(carboxyamino)imidazole ribonucleotide synthase [EC:6.3.4.18]	8	3	14	4
K01588 - 5-(carboxyamino)imidazole ribonucleotide mutase [EC:5.4.99.18]	5	2	10	4
K01923 - phosphoribosylaminoimidazole-succinocarboxamide synthase [EC:6.3.2.6]	9	2	13	2
K01756 - adenylosuccinate lyase [EC:4.3.2.2]	13	6	24	20
K00602 - phosphoribosylaminoimidazolecarboxamide formyltransferase / IMP cyclohydrolase [EC:2.1.2.3 3.5.4.10]	11	5	20	19
K01492 - phosphoribosylaminoimidazolecarboxamide formyltransferase [EC:2.1.2.3]	0	0	0	1
K06863 - 5-formaminoimidazole-4-carboxamide-1-(beta)-D-ribofuranosyl 5'-monophosphate synthetase [EC:6.3.4.-]	0	1	6	0
K00759 - adenine phosphoribosyltransferase [EC:2.4.2.7]	6	4	5	3
K01081 - 5'-nucleotidase [EC:3.1.3.5]	6	6	14	25
K11751 - 5'-nucleotidase / UDP-sugar diphosphatase [EC:3.1.3.5 3.6.1.45]	0	0	2	1
K03787 - 5'-nucleotidase [EC:3.1.3.5]	5	9	7	9
K08722 - 5'-nucleotidase [EC:3.1.3.5]	0	0	2	0
K03783 - purine-nucleoside phosphorylase [EC:2.4.2.1]	3	3	10	12
K01239 - purine nucleosidase [EC:3.2.2.1]	0	1	2	4
K00760 - hypoxanthine phosphoribosyltransferase [EC:2.4.2.8]	12	5	7	15
K00088 - IMP dehydrogenase [EC:1.1.1.205]	11	4	18	19
K00940 - nucleoside-diphosphate kinase [EC:2.7.4.6]	4	3	9	8
K02428 - dITP/XTP pyrophosphatase [EC:3.6.1.19]	3	3	6	8
K00769 - xanthine phosphoribosyltransferase [EC:2.4.2.22]	0	1	0	0
K03816 - xanthine phosphoribosyltransferase [EC:2.4.2.22]	0	0	0	6
K00106 - xanthine dehydrogenase/oxidase [EC:1.17.1.4 1.17.3.2]	0	1	0	0
K00087 - xanthine dehydrogenase molybdenum-binding subunit [EC:1.17.1.4]	4	0	14	21
K13479 - xanthine dehydrogenase FAD-binding subunit [EC:1.17.1.4]	0	0	1	0
K13481 - xanthine dehydrogenase small subunit [EC:1.17.1.4]	1	0	2	0
K13482 - xanthine dehydrogenase large subunit [EC:1.17.1.4]	0	2	2	1
K11177 - xanthine dehydrogenase YagR molybdenum-binding subunit [EC:1.17.1.4]	6	1	18	0
K11178 - xanthine dehydrogenase YagS FAD-binding subunit [EC:1.17.1.4]	1	0	7	0
K13483 - xanthine dehydrogenase YagT iron-sulfur-binding subunit	0	0	4	0
K01518 - bis(5'-nucleosidyl)-tetraphosphatase [EC:3.6.1.17]	1	1	0	0
K01951 - GMP synthase (glutamine-hydrolysing) [EC:6.3.5.2]	14	15	32	24
K01487 - guanine deaminase [EC:3.5.4.3]	0	0	2	0
K00942 - guanylate kinase [EC:2.7.4.8]	2	5	7	6
K00525 - ribonucleoside-diphosphate reductase alpha chain [EC:1.17.4.1]	23	27	47	38
K00526 - ribonucleoside-diphosphate reductase beta chain [EC:1.17.4.1]	6	1	6	0
K10807 - ribonucleoside-diphosphate reductase subunit M1 [EC:1.17.4.1]	0	1	0	0
K10808 - ribonucleoside-diphosphate reductase subunit M2 [EC:1.17.4.1]	0	1	0	0
K00527 - ribonucleoside-triphosphate reductase [EC:1.17.4.2]	8	0	14	19
K00904 - deoxyguanosine kinase [EC:2.7.1.113]	0	3	1	4
K01129 - dGTPase [EC:3.1.5.1]	3	4	7	18
K03040 - DNA-directed RNA polymerase subunit alpha [EC:2.7.7.6]	19	9	8	13
K03043 - DNA-directed RNA polymerase subunit beta [EC:2.7.7.6]	25	24	47	52
K03046 - DNA-directed RNA polymerase subunit beta' [EC:2.7.7.6]	32	24	57	57
K13797 - DNA-directed RNA polymerase subunit beta-beta' [EC:2.7.7.6]	0	0	0	1
K03060 - DNA-directed RNA polymerase subunit omega [EC:2.7.7.6]	0	3	1	0
K03042 - DNA-directed RNA polymerase subunit A [EC:2.7.7.6]"	0	1	6	1
K03041 - DNA-directed RNA polymerase subunit A' [EC:2.7.7.6]	0	1	1	1
K03044 - DNA-directed RNA polymerase subunit B' [EC:2.7.7.6]	1	0	0	3
K03045 - DNA-directed RNA polymerase subunit B [EC:2.7.7.6]"	0	0	0	1
K13798 - DNA-directed RNA polymerase subunit B [EC:2.7.7.6]	0	0	4	0
K03053 - DNA-directed RNA polymerase subunit H [EC:2.7.7.6]	0	1	2	0
K03058 - DNA-directed RNA polymerase subunit N [EC:2.7.7.6]	0	0	1	1
K03047 - DNA-directed RNA polymerase subunit D [EC:2.7.7.6]	0	0	3	0
K03049 - DNA-directed RNA polymerase subunit E' [EC:2.7.7.6]	0	0	2	0
K03051 - DNA-directed RNA polymerase subunit F [EC:2.7.7.6]	0	0	1	1
K02335 - DNA polymerase I [EC:2.7.7.7]	21	19	38	42
K02319 - DNA polymerase I [EC:2.7.7.7]	2	0	8	3
K02322 - DNA polymerase II large subunit [EC:2.7.7.7]	0	1	7	2
K02323 - DNA polymerase II small subunit [EC:2.7.7.7]	1	1	1	2
K02337 - DNA polymerase III subunit alpha [EC:2.7.7.7]	28	28	57	42
K03763 - DNA polymerase III subunit alpha, Gram-positive type [EC:2.7.7.7]	1	0	0	0
K02338 - DNA polymerase III subunit beta [EC:2.7.7.7]	13	6	17	20
K02343 - DNA polymerase III subunit gamma/tau [EC:2.7.7.7]	8	9	20	21
K02340 - DNA polymerase III subunit delta [EC:2.7.7.7]	5	8	9	9
K02341 - DNA polymerase III subunit delta' [EC:2.7.7.7]	2	5	14	6
K02342 - DNA polymerase III subunit epsilon [EC:2.7.7.7]	5	8	8	7
K02339 - DNA polymerase III subunit chi [EC:2.7.7.7]	1	0	0	0
K01139 - guanosine-3',5'-bis(diphosphate) 3'-pyrophosphohydrolase [EC:3.1.7.2]	7	1	1	0
K01514 - exopolyphosphatase [EC:3.6.1.11]	4	5	3	6
K01524 - exopolyphosphatase / guanosine-5'-triphosphate,3'-diphosphate pyrophosphatase [EC:3.6.1.11 3.6.1.40]	0	0	0	1
K00951 - GTP pyrophosphokinase [EC:2.7.6.5]	14	5	22	19
K01768 - adenylate cyclase [EC:4.6.1.1]	17	21	13	21
K05851 - adenylate cyclase, class 1 [EC:4.6.1.1]	1	0	0	0
K05873 - adenylate cyclase, class 2 [EC:4.6.1.1]	0	0	1	0
K01769 - guanylate cyclase, other [EC:4.6.1.2]	0	0	1	0
K01120 - 3',5'-cyclic-nucleotide phosphodiesterase [EC:3.1.4.17]	2	0	0	3
K13298 - dual 3',5'-cyclic-AMP and -GMP phosphodiesterase 11 [EC:3.1.4.17 3.1.4.35]	0	1	0	1
K01939 - adenylosuccinate synthase [EC:6.3.4.4]	5	7	23	16
K00856 - adenosine kinase [EC:2.7.1.20]	1	4	3	2
K00893 - deoxycitidine kinase [EC:2.7.1.74]	0	0	1	0
K01488 - adenosine deaminase [EC:3.5.4.4]	4	5	7	8
K01241 - AMP nucleosidase [EC:3.2.2.4]	0	1	1	0
K01486 - adenine deaminase [EC:3.5.4.2]	8	7	17	11
K01119 - 2',3'-cyclic-nucleotide 2'-phosphodiesterase [EC:3.1.4.16]	1	0	1	5
K08693 - 3'-nucleotidase [EC:3.1.3.6]	0	0	1	0
K00939 - adenylate kinase [EC:2.7.4.3]	7	7	10	12
K06928 - nucleoside-triphosphatase THEP1 [EC:3.6.1.15]	1	0	7	7
K00962 - polyribonucleotide nucleotidyltransferase [EC:2.7.7.8]	12	13	32	31
K01525 - bis(5'-nucleosyl)-tetraphosphatase (symmetrical) [EC:3.6.1.41]	0	0	2	0
K01466 - allantoinase [EC:3.5.2.5]	0	0	1	0
K01483 - ureidoglycolate hydrolase [EC:3.5.3.19]	0	0	1	0
K01428 - urease subunit alpha [EC:3.5.1.5]	2	1	2	0
K01429 - urease subunit beta [EC:3.5.1.5]	0	1	0	0
K01430 - urease subunit gamma [EC:3.5.1.5]	1	1	1	0
K00073 - ureidoglycolate dehydrogenase [EC:1.1.1.154]	0	0	1	0
K11540 - carbamoyl-phosphate synthase / aspartate carbamoyltransferase / dihydroorotase [EC:6.3.5.5 2.1.3.2 3.5.2.3]	2	2	2	0
K11541 - carbamoyl-phosphate synthase / aspartate carbamoyltransferase [EC:6.3.5.5 2.1.3.2]	2	1	1	1
K01955 - carbamoyl-phosphate synthase large subunit [EC:6.3.5.5]	19	28	35	18
K01956 - carbamoyl-phosphate synthase small subunit [EC:6.3.5.5]	13	6	5	4
K00609 - aspartate carbamoyltransferase catalytic subunit [EC:2.1.3.2]	9	7	17	13
K00610 - aspartate carbamoyltransferase regulatory subunit	0	0	6	0
K01465 - dihydroorotase [EC:3.5.2.3]	13	9	34	10
K00226 - dihydroorotate dehydrogenase (fumarate) [EC:1.3.98.1]	9	12	16	13
K13421 - uridine monophosphate synthetase [EC:2.4.2.10 4.1.1.23]	0	2	3	4
K00762 - orotate phosphoribosyltransferase [EC:2.4.2.10]	4	4	7	11
K01591 - orotidine-5'-phosphate decarboxylase [EC:4.1.1.23]	7	5	11	13
K00945 - cytidylate kinase [EC:2.7.4.14]	6	5	5	9
K13799 - pantoate ligase / cytidylate kinase [EC:6.3.2.1 2.7.4.14]	0	1	1	0
K13800 - UMP-CMP kinase [EC:2.7.4.- 2.7.4.14]	0	0	0	4
K09903 - uridylate kinase [EC:2.7.4.22]	7	1	12	11
K01937 - CTP synthase [EC:6.3.4.2]	8	6	24	27
K01494 - dCTP deaminase [EC:3.5.4.13]	4	5	7	4
K00876 - uridine kinase [EC:2.7.1.48]	6	5	4	13
K00757 - uridine phosphorylase [EC:2.4.2.3]	1	1	11	1
K00761 - uracil phosphoribosyltransferase [EC:2.4.2.9]	1	4	0	7
K02825 - pyrimidine operon attenuation protein / uracil phosphoribosyltransferase [EC:2.4.2.9]	7	2	5	2
K00207 - dihydropyrimidine dehydrogenase (NADP+) [EC:1.3.1.2]	1	0	0	0
K01464 - dihydropyrimidinase [EC:3.5.2.2]	2	5	8	12
K01431 - beta-ureidopropionase [EC:3.5.1.6]	2	0	1	0
K09024 - flavin reductase [EC:1.5.1.-]	0	1	0	0
K09023 - aminoacrylate hydrolase [EC:3.5.1.-]	0	1	1	0
K00756 - pyrimidine-nucleoside phosphorylase [EC:2.4.2.2]	2	3	5	13
K01485 - cytosine deaminase [EC:3.5.4.1]	0	4	0	0
K00384 - thioredoxin reductase (NADPH) [EC:1.8.1.9]	11	11	21	23
K01520 - dUTP pyrophosphatase [EC:3.6.1.23]	4	0	2	5
K00560 - thymidylate synthase [EC:2.1.1.45]	2	2	11	5
K03465 - thymidylate synthase (FAD) [EC:2.1.1.148]	6	6	11	16
K01489 - cytidine deaminase [EC:3.5.4.5]	4	1	5	12
K00758 - thymidine phosphorylase [EC:2.4.2.4]	3	1	2	0
K01493 - dCMP deaminase [EC:3.5.4.12]	1	1	1	4
K00857 - thymidine kinase [EC:2.7.1.21]	1	2	6	8
K00943 - dTMP kinase [EC:2.7.4.9]	3	2	12	10
K01718 - pseudouridylate synthase [EC:4.2.1.70]	0	2	0	0
K00811 - aspartate aminotransferase, chloroplastic [EC:2.6.1.1]	2	2	8	3
K00812 - aspartate aminotransferase [EC:2.6.1.1]	7	10	22	6
K11358 - aspartate aminotransferase [EC:2.6.1.1]	0	1	2	0
K00278 - L-aspartate oxidase [EC:1.4.3.16]	4	6	23	22
K01779 - aspartate racemase [EC:5.1.1.13]	1	2	0	0
K13566 - omega-amidase [EC:3.5.1.3]	1	0	0	0
K09758 - aspartate 4-decarboxylase [EC:4.1.1.12]	0	1	0	0
K00259 - alanine dehydrogenase [EC:1.4.1.1]	9	8	14	7
K01940 - argininosuccinate synthase [EC:6.3.4.5]	2	9	10	23
K01755 - argininosuccinate lyase [EC:4.3.2.1]	10	5	17	14
K00294 - 1-pyrroline-5-carboxylate dehydrogenase [EC:1.5.1.12]	3	5	15	14
K13821 - proline dehydrogenase / delta 1-pyrroline-5-carboxylate dehydrogenase [EC:1.5.99.8 1.5.1.12]	0	3	0	1
K00928 - aspartate kinase [EC:2.7.2.4]	13	8	18	11
K12524 - bifunctional aspartokinase / homoserine dehydrogenase 1 [EC:2.7.2.4 1.1.1.3]	1	1	0	0
K12526 - bifunctional diaminopimelate decarboxylase / aspartate kinase [EC:4.1.1.20 2.7.2.4]	0	1	0	0
K00133 - aspartate-semialdehyde dehydrogenase [EC:1.2.1.11]	9	4	10	11
K00003 - homoserine dehydrogenase [EC:1.1.1.3]	6	3	9	12
K00872 - homoserine kinase [EC:2.7.1.39]	1	2	2	8
K02204 - homoserine kinase type II [EC:2.7.1.39]	1	1	1	0
K01733 - threonine synthase [EC:4.2.3.1]	12	15	41	44
K01620 - threonine aldolase [EC:4.1.2.5]	2	3	13	9
K00639 - glycine C-acetyltransferase [EC:2.3.1.29]	10	10	21	17
K00060 - threonine 3-dehydrogenase [EC:1.1.1.103]	1	1	2	3
K00643 - 5-aminolevulinate synthase [EC:2.3.1.37]	0	2	0	0
K00274 - monoamine oxidase [EC:1.4.3.4]	2	3	1	1
K00276 - primary-amine oxidase [EC:1.4.3.21]	0	1	0	0
K00281 - glycine dehydrogenase [EC:1.4.4.2]	2	4	7	2
K00282 - glycine dehydrogenase subunit 1 [EC:1.4.4.2]	4	3	19	19
K00283 - glycine dehydrogenase subunit 2 [EC:1.4.4.2]	7	6	16	15
K00273 - D-amino-acid oxidase [EC:1.4.3.3]	0	0	1	0
K00613 - glycine amidinotransferase [EC:2.1.4.1]	0	1	0	0
K00499 - choline monooxygenase [EC:1.14.15.7]	1	2	2	0
K00130 - betaine-aldehyde dehydrogenase [EC:1.2.1.8]	3	0	4	0
K00315 - dimethylglycine dehydrogenase [EC:1.5.8.4]	1	1	0	0
K00301 - sarcosine oxidase [EC:1.5.3.1]	1	0	1	1
K00302 - sarcosine oxidase, subunit alpha [EC:1.5.3.1]	3	2	4	13
K00303 - sarcosine oxidase, subunit beta [EC:1.5.3.1]	7	4	15	21
K01697 - cystathionine beta-synthase [EC:4.2.1.22]	0	4	2	0
K01758 - cystathionine gamma-lyase [EC:4.4.1.1]	2	6	3	0
K01752 - L-serine dehydratase [EC:4.3.1.17]	0	1	7	3
K01754 - threonine dehydratase [EC:4.3.1.19]	10	7	18	7
K01695 - tryptophan synthase alpha chain [EC:4.2.1.20]	2	4	8	4
K01696 - tryptophan synthase beta chain [EC:4.2.1.20]	8	5	13	1
K06001 - tryptophan synthase beta chain [EC:4.2.1.20]	2	7	19	13
K00547 - homocysteine S-methyltransferase [EC:2.1.1.10]	8	3	2	5
K00548 - 5-methyltetrahydrofolate--homocysteine methyltransferase [EC:2.1.1.13]	25	26	27	31
K00549 - 5-methyltetrahydropteroyltriglutamate--homocysteine methyltransferase [EC:2.1.1.14]	1	4	2	4
K00789 - S-adenosylmethionine synthetase [EC:2.5.1.6]	11	9	19	16
K01611 - S-adenosylmethionine decarboxylase [EC:4.1.1.50]	2	0	3	7
K00797 - spermidine synthase [EC:2.5.1.16]	6	6	23	33
K01243 - S-adenosylhomocysteine/5'-methylthioadenosine nucleosidase [EC:3.2.2.9]	1	0	2	3
K00899 - 5-methylthioribose kinase [EC:2.7.1.100]	0	1	1	0
K00772 - 5'-methylthioadenosine phosphorylase [EC:2.4.2.28]	4	4	10	8
K08963 - methylthioribose-1-phosphate isomerase [EC:5.3.1.23]	3	3	13	20
K08964 - methylthioribulose-1-phosphate dehydratase [EC:4.2.1.109]	0	1	0	0
K08967 - 1,2-dihydroxy-3-keto-5-methylthiopentene dioxygenase [EC:1.13.11.53 1.13.11.54]	0	0	2	0
K00832 - aromatic-amino-acid transaminase [EC:2.6.1.57]	1	1	0	0
K00558 - DNA (cytosine-5-)-methyltransferase [EC:2.1.1.37]	2	6	3	2
K01251 - adenosylhomocysteinase [EC:3.3.1.1]	6	6	28	24
K01740 - O-acetylhomoserine (thiol)-lyase [EC:2.5.1.49]	6	8	4	4
K10764 - O-succinylhomoserine sulfhydrylase [EC:2.5.1.-]	1	1	2	0
K00456 - cysteine dioxygenase [EC:1.13.11.20]	0	0	1	0
K01011 - thiosulfate/3-mercaptopyruvate sulfurtransferase [EC:2.8.1.1 2.8.1.2]	0	3	1	0
K05396 - D-cysteine desulfhydrase [EC:4.4.1.15]	1	2	4	12
K01761 - methionine-gamma-lyase [EC:4.4.1.11]	4	1	7	11
K00826 - branched-chain amino acid aminotransferase [EC:2.6.1.42]	6	8	24	18
K00271 - valine dehydrogenase (NAD+) [EC:1.4.1.23]	0	0	1	0
K00263 - leucine dehydrogenase [EC:1.4.1.9]	1	0	6	0
K00166 - 2-oxoisovalerate dehydrogenase E1 component, alpha subunit [EC:1.2.4.4]	0	0	1	0
K00167 - 2-oxoisovalerate dehydrogenase E1 component, beta subunit [EC:1.2.4.4]	1	0	3	1
K11381 - 2-oxoisovalerate dehydrogenase E1 component [EC:1.2.4.4]	4	2	8	0
K09699 - 2-oxoisovalerate dehydrogenase E2 component (dihydrolipoyl transacylase) [EC:2.3.1.168]	0	1	0	0
K00186 - 2-oxoisovalerate ferredoxin oxidoreductase, alpha subunit [EC:1.2.7.7]	0	0	5	0
K00187 - 2-oxoisovalerate ferredoxin oxidoreductase, beta subunit [EC:1.2.7.7]	0	0	1	0
K00189 - 2-oxoisovalerate ferredoxin oxidoreductase, gamma subunit [EC:1.2.7.7]	0	0	0	1
K00253 - isovaleryl-CoA dehydrogenase [EC:1.3.8.4]	4	2	1	1
K11538 - isobutyryl-CoA dehydrogenase [EC:1.3.99.-]	0	1	0	0
K08683 - 3-hydroxyacyl-CoA dehydrogenase / 3-hydroxy-2-methylbutyryl-CoA dehydrogenase [EC:1.1.1.35 1.1.1.178]	1	0	0	0
K00020 - 3-hydroxyisobutyrate dehydrogenase [EC:1.1.1.31]	3	7	1	2
K01968 - 3-methylcrotonyl-CoA carboxylase alpha subunit [EC:6.4.1.4]	2	2	2	1
K01969 - 3-methylcrotonyl-CoA carboxylase beta subunit [EC:6.4.1.4]	4	3	5	1
K13766 - methylglutaconyl-CoA hydratase [EC:4.2.1.18]	1	2	1	3
K09011 - D-citramalate synthase [EC:2.3.1.182]	2	0	2	0
K00052 - 3-isopropylmalate dehydrogenase [EC:1.1.1.85]	7	5	8	6
K00053 - ketol-acid reductoisomerase [EC:1.1.1.86]	3	7	6	3
K01687 - dihydroxy-acid dehydratase [EC:4.2.1.9]	14	10	20	8
K00835 - valine--pyruvate aminotransferase [EC:2.6.1.66]	1	1	1	0
K01714 - dihydrodipicolinate synthase [EC:4.2.1.52]	5	5	12	18
K00215 - dihydrodipicolinate reductase [EC:1.3.1.26]	6	2	9	5
K00674 - 2,3,4,5-tetrahydropyridine-2-carboxylate N-succinyltransferase [EC:2.3.1.117]	4	1	1	0
K00821 - acetylornithine/N-succinyldiaminopimelate aminotransferase [EC:2.6.1.11 2.6.1.17]	4	2	4	8
K01439 - succinyl-diaminopimelate desuccinylase [EC:3.5.1.18]	2	3	9	3
K01778 - diaminopimelate epimerase [EC:5.1.1.7]	6	4	11	6
K10206 - LL-diaminopimelate aminotransferase [EC:2.6.1.83]	1	6	1	9
K01586 - diaminopimelate decarboxylase [EC:4.1.1.20]	6	7	9	6
K05823 - N-acetyldiaminopimelate deacetylase [EC:3.5.1.47]	1	0	0	2
K03340 - diaminopimelate dehydrogenase [EC:1.4.1.16]	0	1	0	4
K05824 - homoisocitrate dehydrogenase [EC:1.1.1.87]	1	0	0	0
K00825 - kynurenine/2-aminoadipate aminotransferase [EC:2.6.1.7 2.6.1.39]	0	2	0	2
K05825 - 2-aminoadipate transaminase [EC:2.6.1.-]	0	0	1	0
K00293 - saccharopine dehydrogenase (NADP+, L-glutamate forming) [EC:1.5.1.10]	0	1	2	9
K00290 - saccharopine dehydrogenase (NAD+, L-lysine forming) [EC:1.5.1.7]	2	2	3	4
K00291 - saccharopine dehydrogenase (NADP+, L-lysine forming) [EC:1.5.1.8]	0	0	0	3
K03918 - L-lysine 6-transaminase [EC:2.6.1.36]	1	2	1	1
K05826 - alpha-aminoadipate carrier protein LysW	0	1	0	0
K05827 - alpha-aminoadipate--LysW ligase LysX [EC:6.3.2.-]	1	1	6	9
K05828 - acetylglutamate/LysW-gamma-L-alpha-aminoadipate kinase [EC:2.7.2.8 2.7.2.-]	0	0	2	0
K05829 - N-acetyl-gamma-glutamyl-phosphate/LysW-gamma-L-alpha-aminoadipyl-6-phosphate reductase [EC:1.2.1.38 1.2.1.-]	1	0	1	0
K05830 - acetylornithine/LysW-gamma-L-lysine aminotransferase [EC:2.6.1.11 2.6.1.-]	2	1	3	6
K05831 - LysW-gamma-L-lysine carboxypeptidase	2	1	2	7
K01928 - UDP-N-acetylmuramoyl-L-alanyl-D-glutamate--2,6-diaminopimelate ligase [EC:6.3.2.13]	10	4	16	22
K01929 - UDP-N-acetylmuramoyl-tripeptide--D-alanyl-D-alanine ligase [EC:6.3.2.10]	7	14	28	21
K00292 - saccharopine dehydrogenase (NAD+, L-glutamate forming) [EC:1.5.1.9]	0	0	0	1
K01582 - lysine decarboxylase [EC:4.1.1.18]	0	1	0	0
K01843 - lysine 2,3-aminomutase [EC:5.4.3.2]	6	9	6	5
K01844 - beta-lysine 5,6-aminomutase [EC:5.4.3.3]	0	1	0	1
K00824 - D-alanine transaminase [EC:2.6.1.21]	0	0	1	2
K01423 - [EC:3.4.-.-]	9	6	27	6
K01470 - creatinine amidohydrolase [EC:3.5.2.10]	1	6	11	10
K01473 - N-methylhydantoinase A [EC:3.5.2.14]	5	3	16	3
K01474 - N-methylhydantoinase B [EC:3.5.2.14]	3	0	8	2
K08687 - N-carbamoylsarcosine amidase [EC:3.5.1.59]	1	0	0	2
K01584 - arginine decarboxylase [EC:4.1.1.19]	0	0	1	0
K01585 - arginine decarboxylase [EC:4.1.1.19]	1	1	3	0
K02626 - arginine decarboxylase [EC:4.1.1.19]	2	0	11	8
K01480 - agmatinase [EC:3.5.3.11]	2	1	9	6
K10536 - agmatine deiminase [EC:3.5.3.12]	2	2	2	4
K12251 - N-carbamoylputrescine amidase [EC:3.5.1.53]	4	3	5	0
K01581 - ornithine decarboxylase [EC:4.1.1.17]	2	0	5	14
K13747 - carboxynorspermidine decarboxylase [EC:4.1.1.-]	0	1	1	0
K09251 - putrescine aminotransferase [EC:2.6.1.82]	3	1	1	0
K00137 - aminobutyraldehyde dehydrogenase [EC:1.2.1.19]	0	1	0	0
K12254 - 4-guanidinobutyraldehyde dehydrogenase / NAD-dependent aldehyde dehydrogenase [EC:1.2.1.54 1.2.1.-]	1	0	0	0
K00657 - diamine N-acetyltransferase [EC:2.3.1.57]	0	1	0	0
K01426 - amidase [EC:3.5.1.4]	5	8	3	8
K09471 - gamma-glutamylputrescine oxidase [EC:1.4.3.-]	0	0	1	1
K09472 - gamma-glutamyl-gamma-aminobutyraldehyde dehydrogenase [EC:1.2.1.-]	1	0	0	0
K00934 - arginine kinase [EC:2.7.3.3]	1	0	0	0
K00819 - ornithine--oxo-acid transaminase [EC:2.6.1.13]	1	6	6	19
K00286 - pyrroline-5-carboxylate reductase [EC:1.5.1.2]	2	8	2	4
K00318 - proline dehydrogenase [EC:1.5.99.8]	2	2	5	0
K01750 - ornithine cyclodeaminase [EC:4.3.1.12]	5	5	5	12
K00931 - glutamate 5-kinase [EC:2.7.2.11]	5	2	5	8
K00147 - glutamate-5-semialdehyde dehydrogenase [EC:1.2.1.41]	3	2	8	4
K12657 - delta-1-pyrroline-5-carboxylate synthetase [EC:2.7.2.11 1.2.1.41]	0	0	0	1
K01259 - proline iminopeptidase [EC:3.4.11.5]	2	6	2	3
K12658 - 4-hydroxyproline epimerase [EC:5.1.1.8]	0	2	0	0
K01777 - proline racemase [EC:5.1.1.4]	3	0	0	0
K10794 - D-proline reductase (dithiol) PrdB [EC:1.21.4.1]	1	0	0	1
K00611 - ornithine carbamoyltransferase [EC:2.1.3.3]	10	2	14	18
K09065 - N-acetylornithine carbamoyltransferase [EC:2.1.3.9]	0	0	0	2
K13043 - N-succinyl-L-ornithine transcarbamylase [EC:2.1.3.11]	0	0	1	0
K01476 - arginase [EC:3.5.3.1]	2	3	4	2
K01941 - urea carboxylase [EC:6.3.4.6]	0	0	1	0
K01457 - allophanate hydrolase [EC:3.5.1.54]	1	0	3	1
K00619 - amino-acid N-acetyltransferase [EC:2.3.1.1]	3	2	2	1
K00620 - glutamate N-acetyltransferase / amino-acid N-acetyltransferase [EC:2.3.1.35 2.3.1.1]	3	5	6	6
K00930 - acetylglutamate kinase [EC:2.7.2.8]	7	4	5	8
K00145 - N-acetyl-gamma-glutamyl-phosphate reductase [EC:1.2.1.38]	7	3	7	4
K00818 - acetylornithine aminotransferase [EC:2.6.1.11]	4	2	4	2
K01438 - acetylornithine deacetylase [EC:3.5.1.16]	3	6	7	5
K00765 - ATP phosphoribosyltransferase [EC:2.4.2.17]	4	5	7	2
K02502 - ATP phosphoribosyltransferase regulatory subunit	2	2	1	0
K01523 - phosphoribosyl-ATP pyrophosphohydrolase [EC:3.6.1.31]	0	0	1	0
K01496 - phosphoribosyl-AMP cyclohydrolase [EC:3.5.4.19]	1	0	2	0
K11755 - phosphoribosyl-ATP pyrophosphohydrolase / phosphoribosyl-AMP cyclohydrolase [EC:3.6.1.31 3.5.4.19]	2	1	2	1
K01814 - phosphoribosylformimino-5-aminoimidazole carboxamide ribotide isomerase [EC:5.3.1.16]	0	2	9	10
K02501 - glutamine amidotransferase [EC:2.4.2.-]	2	3	6	3
K02500 - cyclase [EC:4.1.3.-]	6	4	8	12
K01693 - imidazoleglycerol-phosphate dehydratase [EC:4.2.1.19]	4	1	3	2
K00817 - histidinol-phosphate aminotransferase [EC:2.6.1.9]	12	5	20	16
K01089 - imidazoleglycerol-phosphate dehydratase / histidinol-phosphatase [EC:4.2.1.19 3.1.3.15]	0	0	3	0
K04486 - histidinol-phosphatase (PHP family) [EC:3.1.3.15]	2	3	7	9
K00013 - histidinol dehydrogenase [EC:1.1.1.23]	2	12	12	7
K01745 - histidine ammonia-lyase [EC:4.3.1.3]	5	7	8	19
K01712 - urocanate hydratase [EC:4.2.1.49]	8	2	16	14
K01468 - imidazolonepropionase [EC:3.5.2.7]	3	6	9	8
K01479 - formiminoglutamase [EC:3.5.3.8]	1	0	0	4
K00603 - glutamate formiminotransferase [EC:2.1.2.5]	0	0	5	8
K13990 - glutamate formiminotransferase / formiminotetrahydrofolate cyclodeaminase [EC:2.1.2.5 4.3.1.4]	1	3	1	1
K05603 - formimidoylglutamate deiminase [EC:3.5.3.13]	0	0	1	0
K00492 - [EC:1.14.13.-]	0	0	1	0
K01590 - histidine decarboxylase [EC:4.1.1.22]	0	0	1	0
K01593 - aromatic-L-amino-acid decarboxylase [EC:4.1.1.28]	2	1	1	5
K00599 - [EC:2.1.1.-]	14	19	36	40
K00457 - 4-hydroxyphenylpyruvate dioxygenase [EC:1.13.11.27]	1	1	4	3
K00451 - homogentisate 1,2-dioxygenase [EC:1.13.11.5]	4	1	2	1
K01800 - maleylacetoacetate isomerase [EC:5.2.1.2]	1	1	1	0
K01555 - fumarylacetoacetase [EC:3.7.1.2]	2	0	3	0
K00505 - tyrosinase [EC:1.14.18.1]	0	0	0	2
K01592 - tyrosine decarboxylase [EC:4.1.1.25]	0	0	1	0
K00483 - 4-hydroxyphenylacetate-3-monooxygenase large chain [EC:1.14.14.9]	2	3	14	7
K00151 - 5-carboxymethyl-2-hydroxymuconic-semialdehyde dehydrogenase [EC:1.2.1.60]	2	1	1	0
K05921 - 5-oxopent-3-ene-1,2,5-tricarboxylate decarboxylase / 2-hydroxyhepta-2,4-diene-1,7-dioate isomerase [EC:4.1.1.68 5.3.3.-]	1	0	1	0
K02509 - 2-oxo-hept-3-ene-1,7-dioate hydratase [EC:4.2.1.-]	1	1	0	1
K02510 - 2,4-dihydroxyhept-2-ene-1,7-dioic acid aldolase [EC:4.1.2.-]	1	1	1	1
K01668 - tyrosine phenol-lyase [EC:4.1.99.2]	3	3	4	3
K00055 - aryl-alcohol dehydrogenase [EC:1.1.1.90]	1	0	3	2
K00680 - [EC:2.3.1.-]	4	8	22	11
K00500 - phenylalanine-4-hydroxylase [EC:1.14.16.1]	1	0	1	2
K01912 - phenylacetate-CoA ligase [EC:6.2.1.30]	9	13	17	16
K02614 - acyl-CoA thioesterase [EC:3.1.2.-]	0	3	1	0
K02609 - ring-1,2-phenylacetyl-CoA epoxidase subunit PaaA [EC:1.14.13.149]	0	1	0	0
K02611 - ring-1,2-phenylacetyl-CoA epoxidase subunit PaaC [EC:1.14.13.149]	1	1	1	0
K02613 - ring-1,2-phenylacetyl-CoA epoxidase subunit PaaE	1	1	0	0
K02618 - oxepin-CoA hydrolase / 3-oxo-5,6-dehydrosuberyl-CoA semialdehyde dehydrogenase [EC:3.7.1.16 1.17.1.7]	1	0	1	0
K02615 - acetyl-CoA acetyltransferase [EC:2.3.1.-]	0	0	1	0
K00285 - D-amino-acid dehydrogenase [EC:1.4.99.1]	3	2	1	0
K01451 - hippurate hydrolase [EC:3.5.1.32]	3	1	6	7
K05708 - 3-phenylpropionate/cinnamic acid dioxygenase subunit alpha [EC:1.14.12.19]	0	1	0	0
K05710 - dioxygenase ferredoxin subunit	3	2	5	0
K05712 - 3-(3-hydroxy-phenyl)propionate hydroxylase [EC:1.14.13.127]	0	3	0	0
K05714 - 2-hydroxy-6-ketonona-2,4-dienedioic acid hydrolase [EC:3.7.1.-]	1	2	0	1
K01666 - 4-hydroxy 2-oxovalerate aldolase [EC:4.1.3.39]	0	3	0	0
K00588 - caffeoyl-CoA O-methyltransferase [EC:2.1.1.104]	1	2	0	0
K00453 - tryptophan 2,3-dioxygenase [EC:1.13.11.11]	1	1	1	0
K00463 - indoleamine 2,3-dioxygenase [EC:1.13.11.52]	0	1	0	0
K00486 - kynurenine 3-monooxygenase [EC:1.14.13.9]	0	0	1	0
K01556 - kynureninase [EC:3.7.1.3]	1	0	2	2
K03392 - aminocarboxymuconate-semialdehyde decarboxylase [EC:4.1.1.45]	1	1	1	0
K01667 - tryptophanase [EC:4.1.99.1]	3	9	9	10
K00543 - acetylserotonin N-methyltransferase [EC:2.1.1.4]	0	1	0	0
K04103 - indolepyruvate decarboxylase [EC:4.1.1.74]	0	1	0	0
K01626 - 3-deoxy-7-phosphoheptulonate synthase [EC:2.5.1.54]	2	1	1	1
K03856 - 3-deoxy-7-phosphoheptulonate synthase [EC:2.5.1.54]	11	9	6	33
K01735 - 3-dehydroquinate synthase [EC:4.2.3.4]	4	5	6	8
K13829 - shikimate kinase / 3-dehydroquinate synthase [EC:2.7.1.71 4.2.3.4]	0	1	0	0
K03785 - 3-dehydroquinate dehydratase I [EC:4.2.1.10]	1	0	0	2
K03786 - 3-dehydroquinate dehydratase II [EC:4.2.1.10]	3	3	8	3
K13832 - 3-dehydroquinate dehydratase / shikimate dehydrogenase [EC:4.2.1.10 1.1.1.25]	0	1	3	0
K00014 - shikimate dehydrogenase [EC:1.1.1.25]	4	4	3	7
K00891 - shikimate kinase [EC:2.7.1.71]	5	1	8	2
K00800 - 3-phosphoshikimate 1-carboxyvinyltransferase [EC:2.5.1.19]	12	7	9	8
K01736 - chorismate synthase [EC:4.2.3.5]	4	3	11	11
K01657 - anthranilate synthase component I [EC:4.1.3.27]	8	4	10	8
K01658 - anthranilate synthase component II [EC:4.1.3.27]	2	2	3	3
K00766 - anthranilate phosphoribosyltransferase [EC:2.4.2.18]	2	3	6	11
K13497 - anthranilate synthase/phosphoribosyltransferase [EC:4.1.3.27 2.4.2.18]	0	1	0	0
K01817 - phosphoribosylanthranilate isomerase [EC:5.3.1.24]	4	3	2	3
K01609 - indole-3-glycerol phosphate synthase [EC:4.1.1.48]	2	4	7	2
K01850 - chorismate mutase [EC:5.4.99.5]	1	0	0	0
K04516 - chorismate mutase [EC:5.4.99.5]	0	1	1	0
K06208 - chorismate mutase [EC:5.4.99.5]	1	1	1	4
K00210 - prephenate dehydrogenase [EC:1.3.1.12]	0	0	0	1
K04517 - prephenate dehydrogenase [EC:1.3.1.12]	4	0	11	10
K04518 - prephenate dehydratase [EC:4.2.1.51]	8	4	9	13
K01579 - aspartate 1-decarboxylase [EC:4.1.1.11]	7	3	4	2
K01918 - pantoate--beta-alanine ligase [EC:6.3.2.1]	2	5	13	4
K03852 - sulfoacetaldehyde acetyltransferase [EC:2.3.3.15]	0	0	1	0
K05306 - phosphonoacetaldehyde hydrolase [EC:3.11.1.1]	0	0	0	1
K03430 - 2-aminoethylphosphonate-pyruvate transaminase [EC:2.6.1.37]	0	2	1	0
K00119 - [EC:1.1.99.-]	0	2	3	0
K03823 - phosphinothricin acetyltransferase [EC:2.3.1.183]	2	3	0	6
K11717 - cysteine desulfurase / selenocysteine lyase [EC:2.8.1.7 4.4.1.16]	7	4	13	12
K12527 - putative selenate reductase [EC:1.97.1.9]	0	0	0	3
K12528 - putative selenate reductase molybdopterin-binding subunit	1	1	0	3
K12529 - putative selenate reductase FAD-binding subunit	0	1	0	0
K01008 - selenide, water dikinase [EC:2.7.9.3]	4	3	8	17
K01042 - L-seryl-tRNA(Ser) seleniumtransferase [EC:2.9.1.1]	6	3	11	8
K01874 - methionyl-tRNA synthetase [EC:6.1.1.10]	12	16	25	28
K01776 - glutamate racemase [EC:5.1.1.3]	0	2	5	8
K01925 - UDP-N-acetylmuramoylalanine--D-glutamate ligase [EC:6.3.2.9]	9	9	18	22
K01924 - UDP-N-acetylmuramate--alanine ligase [EC:6.3.2.8]	12	8	19	24
K01775 - alanine racemase [EC:5.1.1.1]	9	9	18	17
K01921 - D-alanine-D-alanine ligase [EC:6.3.2.4]	16	14	15	17
K01469 - 5-oxoprolinase (ATP-hydrolysing) [EC:3.5.2.9]	0	2	2	0
K01919 - glutamate--cysteine ligase [EC:6.3.2.2]	2	0	6	0
K01920 - glutathione synthase [EC:6.3.2.3]	1	2	3	0
K01255 - leucyl aminopeptidase [EC:3.4.11.1]	7	9	22	12
K11140 - aminopeptidase N [EC:3.4.11.2]	0	0	0	1
K01256 - aminopeptidase N [EC:3.4.11.2]	5	8	7	4
K01270 - dipeptidase D [EC:3.4.13.-]	0	2	1	0
K00799 - glutathione S-transferase [EC:2.5.1.18]	3	8	1	0
K04097 - glutathione S-transferase [EC:2.5.1.18]	0	1	0	0
K00383 - glutathione reductase (NADPH) [EC:1.8.1.7]	0	1	0	0
K01001 - UDP-N-acetylglucosamine--dolichyl-phosphate N-acetylglucosaminephosphotransferase [EC:2.7.8.15]	0	0	2	2
K00729 - dolichyl-phosphate beta-glucosyltransferase [EC:2.4.1.117]	0	0	2	0
K00721 - dolichol-phosphate mannosyltransferase [EC:2.4.1.83]	13	11	18	31
K07151 - dolichyl-diphosphooligosaccharide--protein glycosyltransferase [EC:2.4.1.119]	0	0	3	3
K05535 - alpha 1,2-mannosyltransferase [EC:2.4.1.-]	1	0	0	0
K09656 - beta-1,4-N-acetylgalactosaminyltransferase 3 [EC:2.4.1.244]	0	1	0	0
K09667 - polypeptide N-acetylglucosaminyltransferase [EC:2.4.1.-]	2	1	6	7
K00728 - dolichyl-phosphate-mannose-protein mannosyltransferase [EC:2.4.1.109]	1	1	0	0
K01136 - iduronate 2-sulfatase [EC:3.1.6.13]	0	1	0	0
K01132 - N-acetylgalactosamine-6-sulfatase [EC:3.1.6.4]	0	0	0	1
K01137 - N-acetylglucosamine-6-sulfatase [EC:3.1.6.14]	1	0	6	0
K03857 - phosphatidylinositol glycan, class A [EC:2.4.1.198]	0	0	1	0
K03434 - N-acetylglucosaminylphosphatidylinositol deacetylase [EC:3.5.1.89]	0	0	1	0
K01127 - glycosylphosphatidylinositol phospholipase D [EC:3.1.4.50]	2	0	2	0
K05310 - ethanolaminephosphotransferase [EC:2.7.-.-]	0	0	1	0
K00743 - N-acetyllactosaminide 3-alpha-galactosyltransferase [EC:2.4.1.87]	0	0	0	3
K00677 - UDP-N-acetylglucosamine acyltransferase [EC:2.3.1.129]	6	4	2	2
K02535 - UDP-3-O-[3-hydroxymyristoyl] N-acetylglucosamine deacetylase [EC:3.5.1.108]	4	3	6	5
K02536 - UDP-3-O-[3-hydroxymyristoyl] glucosamine N-acyltransferase [EC:2.3.1.191]	6	2	3	6
K03269 - UDP-2,3-diacylglucosamine hydrolase [EC:3.6.1.54]	1	0	1	1
K00748 - lipid-A-disaccharide synthase [EC:2.4.1.182]	6	3	3	4
K00912 - tetraacyldisaccharide 4'-kinase [EC:2.7.1.130]	5	3	4	1
K01627 - 2-dehydro-3-deoxyphosphooctonate aldolase (KDO 8-P synthase) [EC:2.5.1.55]	3	2	5	4
K03270 - 3-deoxy-D-manno-octulosonate 8-phosphate phosphatase (KDO 8-P phosphatase) [EC:3.1.3.45]	2	1	0	1
K00979 - 3-deoxy-manno-octulosonate cytidylyltransferase (CMP-KDO synthetase) [EC:2.7.7.38]	4	3	4	1
K02527 - 3-deoxy-D-manno-octulosonic-acid transferase [EC:2.4.99.12 2.4.99.13 2.4.99.14 2.4.99.15]	6	2	7	2
K02517 - lipid A biosynthesis lauroyl acyltransferase [EC:2.3.1.-]	2	3	5	6
K11211 - 3-deoxy-D-manno-octulosonic acid kinase [EC:2.7.1.166]	1	0	0	0
K03271 - D-sedoheptulose 7-phosphate isomerase [EC:5.3.1.28]	2	3	7	4
K03272 - D-beta-D-heptose 7-phosphate kinase / D-beta-D-heptose 1-phosphate adenosyltransferase [EC:2.7.1.167 2.7.7.70]	4	5	3	3
K03273 - D-glycero-D-manno-heptose 1,7-bisphosphate phosphatase [EC:3.1.3.82 3.1.3.83]	2	3	2	6
K03274 - ADP-L-glycero-D-manno-heptose 6-epimerase [EC:5.1.3.20]	0	2	0	1
K07031 - D-glycero-alpha-D-manno-heptose-7-phosphate kinase [EC:2.7.1.168]	1	1	6	8
K02841 - heptosyltransferase I [EC:2.4.-.-]	1	1	0	2
K02843 - heptosyltransferase II [EC:2.4.-.-]	5	6	9	5
K02844 - UDP-glucose:(heptosyl)LPS alpha-1,3-glucosyltransferase [EC:2.4.1.-]	1	1	4	2
K02849 - heptosyltransferase III [EC:2.4.-.-]	2	2	1	2
K06153 - undecaprenyl-diphosphatase [EC:3.6.1.27]	3	4	16	9
K01000 - phospho-N-acetylmuramoyl-pentapeptide-transferase [EC:2.7.8.13]	3	3	16	16
K02563 - UDP-N-acetylglucosamine--N-acetylmuramyl-(pentapeptide) pyrophosphoryl-undecaprenol N-acetylglucosamine transferase [EC:2.4.1.227]	6	5	14	12
K03980 - virulence factor	13	14	27	42
K03814 - monofunctional biosynthetic peptidoglycan transglycosylase [EC:2.4.1.-]	0	0	1	0
K05367 - penicillin-binding protein 1C [EC:2.4.1.-]	0	4	1	7
K05364 - peptidoglycan glycosyltransferase [EC:2.4.1.129]	5	5	7	22
K05366 - penicillin-binding protein 1A [EC:2.4.1.- 3.4.-.-]	16	8	16	21
K05365 - penicillin-binding protein 1B [EC:2.4.1.129 3.4.-.-]	2	1	3	0
K05515 - penicillin-binding protein 2	9	16	26	31
K03587 - cell division protein FtsI (penicillin-binding protein 3) [EC:2.4.1.129]	6	16	26	12
K07258 - D-alanyl-D-alanine carboxypeptidase (penicillin-binding protein 5/6) [EC:3.4.16.4]	3	0	5	3
K07259 - D-alanyl-D-alanine carboxypeptidase / D-alanyl-D-alanine-endopeptidase (penicillin-binding protein 4) [EC:3.4.16.4 3.4.21.-]	5	3	4	1
K11693 - peptidoglycan pentaglycine glycine transferase (the first glycine) [EC:2.3.2.16]	0	1	0	1
K05363 - serine/alanine adding enzyme [EC:2.3.2.10]	0	0	1	0
K01191 - alpha-mannosidase [EC:3.2.1.24]	13	8	29	15
K12311 - lysosomal alpha-mannosidase [EC:3.2.1.24]	0	0	1	0
K01192 - beta-mannosidase [EC:3.2.1.25]	8	5	8	8
K01206 - alpha-L-fucosidase [EC:3.2.1.51]	5	4	5	4
K01444 - N4-(beta-N-acetylglucosaminyl)-L-asparaginase [EC:3.5.1.26]	1	0	2	0
K03147 - thiamine biosynthesis protein ThiC	7	5	6	13
K00941 - hydroxymethylpyrimidine/phosphomethylpyrimidine kinase [EC:2.7.1.49 2.7.4.7]	7	0	5	9
K03148 - sulfur carrier protein ThiS adenylyltransferase [EC:2.7.7.73]	0	0	2	1
K04487 - cysteine desulfurase [EC:2.8.1.7]	12	11	24	24
K03151 - thiamine biosynthesis protein ThiI	4	2	16	5
K03149 - thiamine biosynthesis ThiG	4	2	4	3
K03150 - thiamine biosynthesis ThiH	2	0	0	5
K03153 - glycine oxidase [EC:1.4.3.19]	5	0	3	0
K00878 - hydroxyethylthiazole kinase [EC:2.7.1.50]	0	0	2	9
K00788 - thiamine-phosphate pyrophosphorylase [EC:2.5.1.3]	3	2	11	5
K00946 - thiamine-monophosphate kinase [EC:2.7.4.16]	4	4	13	11
K00949 - thiamine pyrophosphokinase [EC:2.7.6.2]	0	2	1	2
K03707 - thiaminase (transcriptional activator TenA) [EC:3.5.99.2]	3	1	1	4
K01497 - GTP cyclohydrolase II [EC:3.5.4.25]	1	0	0	1
K00082 - 5-amino-6-(5-phosphoribosylamino)uracil reductase [EC:1.1.1.193]	1	1	2	2
K11752 - diaminohydroxyphosphoribosylaminopyrimidine deaminase / 5-amino-6-(5-phosphoribosylamino)uracil reductase [EC:3.5.4.26 1.1.1.193]	4	7	7	5
K02858 - 3,4-dihydroxy 2-butanone 4-phosphate synthase [EC:4.1.99.12]	7	3	15	17
K00794 - 6,7-dimethyl-8-ribityllumazine synthase [EC:2.5.1.78]	3	1	9	4
K00793 - riboflavin synthase [EC:2.5.1.9]	4	5	4	4
K11753 - riboflavin kinase / FMN adenylyltransferase [EC:2.7.1.26 2.7.7.2]	11	3	12	10
K07732 - riboflavin kinase, archaea type [EC:2.7.1.161]	0	0	1	1
K00953 - FAD synthetase [EC:2.7.7.2]	1	0	0	0
K01078 - acid phosphatase [EC:3.1.3.2]	1	1	3	4
K00299 - FMN reductase [EC:1.5.1.38]	0	1	0	0
K04719 - 5,6-dimethylbenzimidazole synthase [EC:1.14.99.40]	0	0	1	0
K00275 - pyridoxamine 5'-phosphate oxidase [EC:1.4.3.5]	2	1	1	0
K03473 - erythronate-4-phosphate dehydrogenase [EC:1.1.1.290]	2	1	2	3
K00097 - 4-hydroxythreonine-4-phosphate dehydrogenase [EC:1.1.1.262]	2	5	3	6
K03474 - pyridoxine 5-phosphate synthase [EC:2.6.99.2]	1	6	3	5
K06215 - pyridoxine biosynthesis protein [EC:4.-.-.-]	4	3	11	11
K08681 - glutamine amidotransferase [EC:2.6.-.-]	3	0	5	5
K06989 - aspartate dehydrogenase [EC:1.4.1.21]	0	0	1	2
K03517 - quinolinate synthase [EC:2.5.1.72]	2	5	13	18
K00767 - nicotinate-nucleotide pyrophosphorylase (carboxylating) [EC:2.4.2.19]	7	7	14	16
K00763 - nicotinate phosphoribosyltransferase [EC:2.4.2.11]	8	6	18	11
K00952 - nicotinamide-nucleotide adenylyltransferase [EC:2.7.7.1]	0	0	5	0
K00969 - nicotinate-nucleotide adenylyltransferase [EC:2.7.7.18]	0	3	4	4
K03426 - NAD+ diphosphatase [EC:3.6.1.22]	0	2	0	0
K01916 - NAD+ synthase [EC:6.3.1.5]	6	2	6	4
K01950 - NAD+ synthase (glutamine-hydrolysing) [EC:6.3.5.1]	6	9	29	27
K08281 - nicotinamidase/pyrazinamidase [EC:3.5.1.19 3.5.1.-]	1	2	5	0
K00858 - NAD+ kinase [EC:2.7.1.23]	2	6	11	15
K00322 - NAD(P) transhydrogenase [EC:1.6.1.1]	0	2	2	0
K00324 - NAD(P) transhydrogenase subunit alpha [EC:1.6.1.2]	6	2	22	0
K00325 - NAD(P) transhydrogenase subunit beta [EC:1.6.1.2]	2	5	4	2
K00606 - 3-methyl-2-oxobutanoate hydroxymethyltransferase [EC:2.1.2.11]	3	10	16	6
K00077 - 2-dehydropantoate 2-reductase [EC:1.1.1.169]	7	7	11	11
K09680 - type II pantothenate kinase [EC:2.7.1.33]	0	0	1	2
K03525 - type III pantothenate kinase [EC:2.7.1.33]	4	8	12	10
K09722 - 4-phosphopantoate---beta-alanine ligase [EC:6.3.2.36]	1	0	1	0
K13038 - phosphopantothenoylcysteine decarboxylase / phosphopantothenate--cysteine ligase [EC:4.1.1.36 6.3.2.5]	9	8	18	13
K02318 - phosphopantetheine adenylyltransferase / dephospho-CoA kinase [EC:2.7.7.3 2.7.1.24]	1	0	0	0
K00954 - pantetheine-phosphate adenylyltransferase [EC:2.7.7.3]	3	7	7	17
K02201 - pantetheine-phosphate adenylyltransferase [EC:2.7.7.3]	0	0	2	0
K00859 - dephospho-CoA kinase [EC:2.7.1.24]	8	4	10	9
K00997 - holo-[acyl-carrier protein] synthase [EC:2.7.8.7]	4	3	5	3
K06133 - 4'-phosphopantetheinyl transferase [EC:2.7.8.-]	1	4	0	0
K01906 - 6-carboxyhexanoate--CoA ligase [EC:6.2.1.14]	4	0	2	1
K00652 - 8-amino-7-oxononanoate synthase [EC:2.3.1.47]	6	0	11	14
K00833 - adenosylmethionine-8-amino-7-oxononanoate aminotransferase [EC:2.6.1.62]	2	1	2	5
K01935 - dethiobiotin synthetase [EC:6.3.3.3]	1	3	2	3
K01012 - biotin synthetase [EC:2.8.1.6]	3	2	9	12
K03524 - BirA family transcriptional regulator, biotin operon repressor / biotin-[acetyl-CoA-carboxylase] ligase [EC:6.3.4.15]	4	3	8	7
K03644 - lipoic acid synthetase [EC:2.8.1.8]	3	2	15	16
K03801 - lipoyl(octanoyl) transferase [EC:2.3.1.181]	3	2	7	5
K03800 - lipoate-protein ligase A [EC:2.7.7.63]	5	0	18	20
K01495 - GTP cyclohydrolase I [EC:3.5.4.16]	3	4	11	5
K01077 - alkaline phosphatase [EC:3.1.3.1]	7	8	4	4
K01113 - alkaline phosphatase D [EC:3.1.3.1]	7	3	5	1
K01633 - dihydroneopterin aldolase [EC:4.1.2.25]	2	2	0	0
K00950 - 2-amino-4-hydroxy-6-hydroxymethyldihydropteridine diphosphokinase [EC:2.7.6.3]	4	2	5	5
K00796 - dihydropteroate synthase [EC:2.5.1.15]	5	3	12	7
K00287 - dihydrofolate reductase [EC:1.5.1.3]	0	3	3	2
K11754 - dihydrofolate synthase / folylpolyglutamate synthase [EC:6.3.2.12 6.3.2.17]	6	6	21	14
K01737 - 6-pyruvoyl tetrahydrobiopterin synthase [EC:4.2.3.12]	4	3	4	6
K03639 - molybdenum cofactor biosynthesis protein	7	8	10	14
K03637 - molybdenum cofactor biosynthesis protein C	3	1	6	4
K03635 - molybdopterin synthase catalytic subunit [EC:2.-.-.-]	4	1	3	3
K03636 - molybdopterin synthase sulfur carrier subunit	0	3	6	3
K01665 - para-aminobenzoate synthetase component I [EC:2.6.1.85]	4	1	3	2
K13950 - para-aminobenzoate synthetase [EC:2.6.1.85]	0	0	1	0
K02619 - 4-amino-4-deoxychorismate lyase [EC:4.1.3.38]	2	1	4	1
K03342 - para-aminobenzoate synthetase / 4-amino-4-deoxychorismate lyase [EC:2.6.1.85 4.1.3.38]	0	0	1	0
K00288 - methylenetetrahydrofolate dehydrogenase (NADP+) / methenyltetrahydrofolate cyclohydrolase / formyltetrahydrofolate synthetase [EC:1.5.1.5 3.5.4.9 6.3.4.3]	1	3	1	10
K13403 - methylenetetrahydrofolate dehydrogenase(NAD+) / 5,10-methenyltetrahydrofolate cyclohydrolase [EC:1.5.1.15 3.5.4.9]	0	1	0	0
K00604 - methionyl-tRNA formyltransferase [EC:2.1.2.9]	8	4	14	9
K00289 - formyltetrahydrofolate dehydrogenase [EC:1.5.1.6]	1	0	0	0
K01746 - formiminotetrahydrofolate cyclodeaminase [EC:4.3.1.4]	0	0	0	1
K01934 - 5-formyltetrahydrofolate cyclo-ligase [EC:6.3.3.2]	3	0	4	1
K11147 - dehydrogenase/reductase SDR family member 4 [EC:1.1.-.-]	0	0	1	2
K01885 - glutamyl-tRNA synthetase [EC:6.1.1.17]	10	7	19	17
K02492 - glutamyl-tRNA reductase [EC:1.2.1.70]	3	3	7	8
K01845 - glutamate-1-semialdehyde 2,1-aminomutase [EC:5.4.3.8]	10	8	7	7
K01698 - porphobilinogen synthase [EC:4.2.1.24]	5	5	9	1
K01749 - hydroxymethylbilane synthase [EC:2.5.1.61]	8	3	3	4
K01719 - uroporphyrinogen-III synthase [EC:4.2.1.75]	1	0	0	3
K13542 - uroporphyrinogen III methyltransferase / synthase [EC:2.1.1.107 4.2.1.75]	2	5	1	6
K13543 - uroporphyrinogen III methyltransferase / synthase [EC:2.1.1.107 4.2.1.75]	0	0	2	0
K02496 - uroporphyrin-III C-methyltransferase [EC:2.1.1.107]	1	0	0	0
K02302 - uroporphyrin-III C-methyltransferase / precorrin-2 dehydrogenase / sirohydrochlorin ferrochelatase [EC:2.1.1.107 1.3.1.76 4.99.1.4]	1	0	0	0
K02303 - uroporphyrin-III C-methyltransferase [EC:2.1.1.107]	0	1	1	0
K02304 - precorrin-2 dehydrogenase / sirohydrochlorin ferrochelatase [EC:1.3.1.76 4.99.1.4]	1	0	2	1
K01599 - uroporphyrinogen decarboxylase [EC:4.1.1.37]	12	15	28	20
K00228 - coproporphyrinogen III oxidase [EC:1.3.3.3]	0	1	1	0
K02495 - oxygen-independent coproporphyrinogen III oxidase [EC:1.3.99.22]	9	9	6	17
K00230 - menaquinone-dependent protoporphyrinogen oxidase [EC:1.3.5.3]	0	0	1	3
K00231 - oxygen-dependent protoporphyrinogen oxidase [EC:1.3.3.4]	3	5	5	3
K01772 - ferrochelatase [EC:4.99.1.1]	4	5	4	2
K02190 - sirohydrochlorin cobaltochelatase [EC:4.99.1.3]	1	0	0	1
K03795 - sirohydrochlorin cobaltochelatase [EC:4.99.1.3]	1	0	3	0
K03394 - precorrin-2/cobalt-factor-2 C20-methyltransferase [EC:2.1.1.130 2.1.1.151]	1	0	1	2
K02189 - cobalt-precorrin 5A hydrolase [EC:3.7.1.12]	0	0	1	1
K13541 - cobalt-precorrin 5A hydrolase / precorrin-3B C17-methyltransferase [EC:3.7.1.12 2.1.1.131]	0	2	1	2
K05936 - precorrin-4 C11-methyltransferase [EC:2.1.1.133]	2	0	2	0
K05895 - precorrin-6X reductase [EC:1.3.1.54]	0	1	0	0
K02188 - cobalt-precorrin-5B (C1)-methyltransferase [EC:2.1.1.195]	3	2	0	1
K00595 - precorrin-6Y C5,15-methyltransferase / precorrin-8W decarboxylase [EC:2.1.1.132 1.-.-.-]	1	1	1	1
K03399 - precorrin-6Y C5,15-methyltransferase [EC:2.1.1.132]	0	0	1	0
K06042 - precorrin-8X methylmutase [EC:5.4.1.2]	3	2	1	2
K02224 - cobyrinic acid a,c-diamide synthase [EC:6.3.5.9 6.3.5.11]	3	3	6	5
K02230 - cobaltochelatase CobN [EC:6.6.1.2]	7	2	4	7
K02234 - cobalamin biosynthesis protein CobW	0	1	0	2
K00798 - cob(I)alamin adenosyltransferase [EC:2.5.1.17]	6	4	6	4
K02232 - adenosylcobyric acid synthase [EC:6.3.5.10]	1	3	2	5
K02227 - adenosylcobinamide-phosphate synthase [EC:6.3.1.10]	4	1	3	7
K02231 - adenosylcobinamide kinase / adenosylcobinamide-phosphate guanylyltransferase [EC:2.7.1.156 2.7.7.62]	1	3	2	2
K02233 - adenosylcobinamide-GDP ribazoletransferase [EC:2.7.8.26]	0	1	0	3
K00768 - nicotinate-nucleotide--dimethylbenzimidazole phosphoribosyltransferase [EC:2.4.2.21]	1	0	2	9
K04720 - threonine-phosphate decarboxylase [EC:4.1.1.81]	0	0	2	4
K03403 - magnesium chelatase subunit H [EC:6.6.1.1]	12	8	12	9
K03404 - magnesium chelatase subunit D [EC:6.6.1.1]	2	3	3	14
K03405 - magnesium chelatase subunit I [EC:6.6.1.1]	5	3	12	3
K03428 - magnesium-protoporphyrin O-methyltransferase [EC:2.1.1.11]	0	1	0	1
K04034 - anaerobic magnesium-protoporphyrin IX monomethyl ester cyclase [EC:4.-.-.-]	0	2	7	5
K04035 - magnesium-protoporphyrin IX monomethyl ester (oxidative) cyclase [EC:1.14.13.81]	2	0	5	3
K04036 - divinyl protochlorophyllide a 8-vinyl-reductase [EC:1.-.-.-]	1	1	0	1
K04037 - light-independent protochlorophyllide reductase subunit L [EC:1.3.7.7]	1	0	1	2
K04038 - light-independent protochlorophyllide reductase subunit N [EC:1.3.7.7]	1	1	2	2
K04039 - light-independent protochlorophyllide reductase subunit B [EC:1.3.7.7]	2	1	1	3
K04040 - chlorophyll synthase [EC:2.5.1.62]	0	2	1	1
K08099 - chlorophyllase [EC:3.1.1.14]	0	0	0	1
K11333 - chlorophyllide reductase iron protein subunit X [EC:1.18.6.1]	2	0	1	1
K11334 - chlorophyllide reductase subunit Y	1	0	2	1
K11335 - chlorophyllide reductase subunit Z	2	2	2	1
K11336 - 3-vinyl bacteriochlorophyllide hydratase [EC:4.2.1.-]	0	0	0	1
K10960 - geranylgeranyl reductase [EC:1.3.1.83]	1	2	2	2
K13601 - bacteriochlorophyll C8 methyltransferase [EC:2.1.1.-]	0	0	0	1
K00510 - heme oxygenase [EC:1.14.99.3]	0	0	1	0
K08100 - bilirubin oxidase [EC:1.3.3.5]	3	0	0	0
K02217 - ferritin [EC:1.16.3.1]	2	0	0	2
K03181 - chorismate--pyruvate lyase [EC:4.1.3.40]	0	1	0	0
K03179 - 4-hydroxybenzoate octaprenyltransferase [EC:2.5.1.-]	4	3	5	2
K03182 - 3-octaprenyl-4-hydroxybenzoate carboxy-lyase UbiD [EC:4.1.1.-]	6	6	11	2
K03186 - 3-octaprenyl-4-hydroxybenzoate carboxy-lyase UbiX [EC:4.1.1.-]	1	3	3	1
K03688 - ubiquinone biosynthesis protein	7	7	8	11
K00568 - 2-polyprenyl-6-hydroxyphenyl methylase / 3-demethylubiquinone-9 3-methyltransferase [EC:2.1.1.222 2.1.1.64]	3	5	6	2
K03185 - 2-octaprenyl-6-methoxyphenol hydroxylase [EC:1.14.13.-]	2	0	3	0
K03183 - ubiquinone/menaquinone biosynthesis methyltransferase [EC:2.1.1.163 2.1.1.201]	3	5	14	18
K03184 - 2-octaprenyl-3-methyl-6-methoxy-1,4-benzoquinol hydroxylase [EC:1.14.13.-]	2	0	0	0
K06127 - ubiquinone biosynthesis methyltransferase [EC:2.1.1.201]	0	0	1	0
K06134 - ubiquinone biosynthesis monooxygenase Coq7 [EC:1.14.13.-]	1	0	0	0
K02552 - menaquinone-specific isochorismate synthase [EC:5.4.4.2]	2	0	1	4
K02551 - 2-succinyl-5-enolpyruvyl-6-hydroxy-3-cyclohexene-1-carboxylate synthase [EC:2.2.1.9]	1	2	1	6
K08680 - 2-succinyl-6-hydroxy-2,4-cyclohexadiene-1-carboxylate synthase [EC:4.2.99.20]	2	1	0	4
K02549 - O-succinylbenzoate synthase [EC:4.2.1.113]	5	1	8	7
K01911 - O-succinylbenzoic acid--CoA ligase [EC:6.2.1.26]	0	0	3	4
K01661 - naphthoate synthase [EC:4.1.3.36]	0	3	1	2
K02548 - 1,4-dihydroxy-2-naphthoate octaprenyltransferase [EC:2.5.1.74 2.5.1.-]	3	4	11	13
K09833 - homogenitisate phytyltransferase	0	0	0	1
K05928 - tocopherol O-methyltransferase [EC:2.1.1.95]	1	2	1	5
K01662 - 1-deoxy-D-xylulose-5-phosphate synthase [EC:2.2.1.7]	3	8	7	9
K00099 - 1-deoxy-D-xylulose-5-phosphate reductoisomerase [EC:1.1.1.267]	3	4	17	6
K00991 - 2-C-methyl-D-erythritol 4-phosphate cytidylyltransferase [EC:2.7.7.60]	3	1	5	3
K12506 - 2-C-methyl-D-erythritol 4-phosphate cytidylyltransferase / 2-C-methyl-D-erythritol 2,4-cyclodiphosphate synthase [EC:2.7.7.60 4.6.1.12]	0	0	2	3
K00919 - 4-diphosphocytidyl-2-C-methyl-D-erythritol kinase [EC:2.7.1.148]	2	4	9	10
K01770 - 2-C-methyl-D-erythritol 2,4-cyclodiphosphate synthase [EC:4.6.1.12]	2	1	3	0
K03526 - (E)-4-hydroxy-3-methylbut-2-enyl-diphosphate synthase [EC:1.17.7.1]	7	9	8	4
K03527 - 4-hydroxy-3-methylbut-2-enyl diphosphate reductase [EC:1.17.1.2]	4	3	15	9
K00021 - hydroxymethylglutaryl-CoA reductase (NADPH) [EC:1.1.1.34]	2	2	1	0
K00054 - hydroxymethylglutaryl-CoA reductase [EC:1.1.1.88]	3	2	3	10
K00869 - mevalonate kinase [EC:2.7.1.36]	1	2	1	10
K01597 - diphosphomevalonate decarboxylase [EC:4.1.1.33]	1	0	3	2
K01823 - isopentenyl-diphosphate delta-isomerase [EC:5.3.3.2]	1	4	8	12
K00795 - farnesyl diphosphate synthase [EC:2.5.1.1 2.5.1.10]	3	1	1	0
K00804 - geranylgeranyl diphosphate synthase, type III [EC:2.5.1.1 2.5.1.10 2.5.1.29]	0	0	1	0
K13789 - geranylgeranyl diphosphate synthase, type II [EC:2.5.1.1 2.5.1.10 2.5.1.29]	5	4	5	4
K13787 - geranylgeranyl diphosphate synthase, type I [EC:2.5.1.1 2.5.1.10 2.5.1.29]	1	2	8	10
K12503 - short-chain Z-isoprenyl diphosphate synthase [EC:2.5.1.68]	0	1	1	0
K00805 - heptaprenyl diphosphate synthase [EC:2.5.1.30]	3	1	5	0
K02523 - octaprenyl-diphosphate synthase [EC:2.5.1.90]	6	7	5	9
K05356 - all-trans-nonaprenyl-diphosphate synthase [EC:2.5.1.84 2.5.1.85]	0	0	0	1
K00806 - undecaprenyl diphosphate synthase [EC:2.5.1.31]	4	6	8	10
K06013 - STE24 endopeptidase [EC:3.4.24.84]	7	0	11	8
K05525 - linalool 8-monooxygenase [EC:1.14.13.151]	1	0	0	0
K00801 - farnesyl-diphosphate farnesyltransferase [EC:2.5.1.21]	1	3	2	0
K06045 - squalene-hopene/tetraprenyl-beta-curcumene cyclase [EC:5.4.99.17 4.2.1.129]	5	5	7	5
K02291 - phytoene synthase [EC:2.5.1.32]	4	3	4	0
K02293 - 15-cis-phytoene desaturase [EC:1.3.5.5]	0	0	1	4
K09835 - prolycopene isomerase [EC:5.2.1.13]	0	0	2	1
K10027 - phytoene desaturase [EC:1.3.99.26 1.3.99.28 1.3.99.29 1.3.99.31]	6	10	4	12
K06443 - lycopene beta-cyclase [EC:5.5.1.19]	0	1	0	1
K09836 - beta-carotene ketolase (CrtW type)	0	1	0	0
K09879 - isorenieratene synthase	0	2	0	0
K09844 - carotenoid 1,2-hydratase [EC:4.2.1.131]	0	1	1	0
K09845 - 1-hydroxycarotenoid 3,4-desaturase [EC:1.3.99.27]	0	1	0	0
K09846 - demethylspheroidene O-methyltransferase [EC:2.1.1.210]	0	0	1	0
K10210 - diapolycopene oxygenase [EC:1.14.99.44]	0	0	1	0
K10211 - 4,4'-diaponeurosporenoate glycosyltransferase [EC:2.4.1.-]	0	1	0	0
K10212 - glycosyl-4,4'-diaponeurosporenoate acyltransferase [EC:2.3.1.-]	0	0	1	0
K00791 - tRNA dimethylallyltransferase [EC:2.5.1.75]	6	5	18	9
K00517 - [EC:1.14.-.-]	4	5	3	1
K00155 - [EC:1.2.1.-]	1	1	1	1
K13774 - citronellol/citronellal dehydrogenase	0	1	0	0
K13775 - citronellol/citronellal dehydrogenase	1	0	0	0
K11731 - citronellyl-CoA dehydrogenase [EC:1.3.99.-]	0	2	2	0
K13777 - geranyl-CoA carboxylase alpha subunit [EC:6.4.1.5]	1	0	0	0
K13778 - geranyl-CoA carboxylase beta subunit [EC:6.4.1.5]	0	0	1	0
K00257 - [EC:1.3.99.-]	18	19	36	28
K10817 - erythronolide synthase [EC:2.3.1.94]	0	7	0	0
K05551 - act minimal PKS ketosynthase (KS/KS alpha) [EC:2.3.1.-]	0	1	0	0
K05555 - cyclase [EC:4.-.-.-]	1	0	0	1
K00973 - glucose-1-phosphate thymidylyltransferase [EC:2.7.7.24]	18	9	22	31
K01710 - dTDP-glucose 4,6-dehydratase [EC:4.2.1.46]	15	13	27	37
K01790 - dTDP-4-dehydrorhamnose 3,5-epimerase [EC:5.1.3.13]	5	2	6	3
K00067 - dTDP-4-dehydrorhamnose reductase [EC:1.1.1.133]	7	9	4	15
K02364 - enterobactin synthetase component F [EC:2.7.7.-]	1	0	0	0
K04783 - yersiniabactin salicyl-AMP ligase [EC:6.3.2.-]	0	0	0	1
K00660 - chalcone synthase [EC:2.3.1.74]	0	1	0	0
K05281 - 2'-hydroxyisoflavone reductase [EC:1.3.1.45]	1	0	8	0
K08081 - tropine dehydrogenase [EC:1.1.1.206]	0	0	1	0
K01066 - esterase / lipase [EC:3.1.1.-]	1	0	3	3
K00808 - homospermidine synthase [EC:2.5.1.44]	0	1	0	0
K04127 - isopenicillin-N epimerase [EC:5.1.1.17]	1	2	1	2
K01060 - cephalosporin-C deacetylase [EC:3.1.1.41]	1	4	0	1
K10852 - isopenicillin-N N-acyltransferase [EC:2.3.1.164]	0	2	5	10
K01434 - penicillin amidase [EC:3.5.1.11]	18	7	23	8
K01467 - beta-lactamase [EC:3.5.2.6]	2	6	8	5
K03381 - catechol 1,2-dioxygenase [EC:1.13.11.1]	1	0	1	0
K01856 - muconate cycloisomerase [EC:5.5.1.1]	5	3	1	1
K01055 - 3-oxoadipate enol-lactonase [EC:3.1.1.24]	4	5	13	11
K01031 - 3-oxoadipate CoA-transferase, alpha subunit [EC:2.8.3.6]	0	3	0	0
K00446 - catechol 2,3-dioxygenase [EC:1.13.11.2]	1	1	1	1
K01821 - 4-oxalocrotonate tautomerase [EC:5.3.2.-]	0	0	3	0
K00217 - maleylacetate reductase [EC:1.3.1.32]	0	1	0	0
K00448 - protocatechuate 3,4-dioxygenase, alpha subunit [EC:1.13.11.3]	0	0	1	0
K00449 - protocatechuate 3,4-dioxygenase, beta subunit [EC:1.13.11.3]	0	0	3	0
K01857 - 3-carboxy-cis,cis-muconate cycloisomerase [EC:5.5.1.2]	1	0	0	0
K01607 - 4-carboxymuconolactone decarboxylase [EC:4.1.1.44]	2	1	1	1
K04101 - protocatechuate 4,5-dioxygenase, beta chain [EC:1.13.11.8]	0	1	0	0
K10221 - 2-pyrone-4,6-dicarboxylate lactonase [EC:3.1.1.57]	0	0	1	0
K00481 - p-hydroxybenzoate 3-monooxygenase [EC:1.14.13.2]	0	0	2	0
K04108 - 4-hydroxybenzoyl-CoA reductase subunit alpha [EC:1.3.7.9]	0	1	3	1
K04110 - benzoate-CoA ligase [EC:6.2.1.25]	0	1	2	0
K04112 - benzoyl-CoA reductase subunit [EC:1.3.7.8]	1	0	0	0
K04113 - benzoyl-CoA reductase subunit [EC:1.3.7.8]	1	0	0	0
K07538 - 6-hydroxycyclohex-1-ene-1-carboxyl-CoA dehydrogenase [EC:1.1.1.-]	0	0	1	0
K07539 - 6-oxo-cyclohex-1-ene-carbonyl-CoA hydrolase [EC:3.7.1.-]	1	0	0	0
K04116 - cyclohexanecarboxylate-CoA ligase [EC:6.2.1.-]	0	2	0	0
K07535 - 2-hydroxycyclohexanecarboxyl-CoA dehydrogenase [EC:1.1.1.-]	0	1	2	0
K01576 - benzoylformate decarboxylase [EC:4.1.1.7]	1	0	0	0
K03380 - phenol 2-monooxygenase [EC:1.14.13.7]	1	4	0	0
K01612 - 4-hydroxybenzoate decarboxylase [EC:4.1.1.61]	0	0	0	1
K08295 - 2-aminobenzoate-CoA ligase [EC:6.2.1.32]	0	0	0	2
K09461 - anthraniloyl-CoA monooxygenase [EC:1.14.13.40]	0	0	3	0
K03384 - [EC:1.14.12.-]	0	0	1	0
K01045 - arylesterase / paraoxonase [EC:3.1.1.2 3.1.8.1]	0	1	0	0
K01101 - 4-nitrophenyl phosphatase [EC:3.1.3.41]	1	0	1	5
K01860 - chloromuconate cycloisomerase [EC:5.5.1.7]	0	1	2	0
K01061 - carboxymethylenebutenolidase [EC:3.1.1.45]	4	8	6	0
K01563 - haloalkane dehalogenase [EC:3.8.1.5]	2	1	1	2
K01564 - [EC:3.8.1.-]	2	8	13	15
K01561 - haloacetate dehalogenase [EC:3.8.1.3]	0	1	1	0
K01560 - 2-haloacid dehalogenase [EC:3.8.1.2]	1	0	0	0
K07543 - benzylsuccinate CoA-transferase BbsE subunit [EC:2.8.3.15]	1	0	0	0
K07544 - benzylsuccinate CoA-transferase BbsF subunit [EC:2.8.3.15]	1	0	0	0
K05797 - 4-cresol dehydrogenase (hydroxylating) [EC:1.17.99.1]	0	0	0	1
K10702 - 2-hydroxy-6-oxohepta-2,4-dienoate hydroxylase [EC:3.7.1.-]	0	0	0	1
K10680 - N-ethylmaleimide reductase [EC:1.-.-.-]	0	1	0	0
K06281 - hydrogenase large subunit [EC:1.12.99.6]	4	3	7	16
K06282 - hydrogenase small subunit [EC:1.12.99.6]	4	3	6	6
K11180 - sulfite reductase, dissimilatory-type alpha subunit [EC:1.8.99.3]	0	2	1	5
K11181 - sulfite reductase, dissimilatory-type beta subunit [EC:1.8.99.3]	0	1	1	1
K05394 - atrazine chlorohydrolase [EC:3.8.1.8]	0	1	4	1
K03382 - hydroxyatrazine ethylaminohydrolase [EC:3.5.99.3]	2	2	5	7
K01500 - [EC:3.5.4.-]	0	1	0	3
K03379 - cyclohexanone monooxygenase [EC:1.14.13.22]	1	0	0	0
K06446 - acyl-CoA dehydrogenase [EC:1.3.99.-]	1	3	2	2
K00258 - [EC:1.3.-.-]	0	1	0	0
K05915 - [EC:1.13.-.-]	0	1	0	0
K00480 - salicylate hydroxylase [EC:1.14.13.1]	0	0	1	0
K04102 - 4,5-dihydroxyphthalate decarboxylase [EC:4.1.1.55]	0	0	2	0
K03333 - cholesterol oxidase [EC:1.1.3.6]	0	1	1	0
K05898 - 3-oxosteroid 1-dehydrogenase [EC:1.3.99.4]	0	1	0	0
K00569 - thiopurine S-methyltransferase [EC:2.1.1.67]	0	2	0	0
K03927 - carboxylesterase 2 [EC:3.1.1.1 3.1.1.84 3.1.1.56]	1	0	12	1
K03124 - transcription initiation factor TFIIB	1	0	3	0
K03120 - transcription initiation factor TFIID TATA-box-binding protein	1	0	1	3
K03130 - transcription initiation factor TFIID subunit 5	1	1	4	1
K03136 - transcription initiation factor TFIIE subunit alpha	0	1	1	0
K10844 - DNA excision repair protein ERCC-2 [EC:3.6.4.12]	0	0	3	0
K12828 - splicing factor 3B subunit 1	0	0	0	1
K12857 - Prp8 binding protein	0	0	1	0
K12733 - peptidyl-prolyl cis-trans isomerase-like 1 [EC:5.2.1.8]	1	0	0	0
K12880 - THO complex subunit 3	0	1	0	0
K12887 - heterogeneous nuclear ribonucleoprotein M	1	0	0	0
K02945 - small subunit ribosomal protein S1	12	15	24	31
K02967 - small subunit ribosomal protein S2	8	9	14	8
K02982 - small subunit ribosomal protein S3	4	2	5	14
K02986 - small subunit ribosomal protein S4	3	2	8	7
K02988 - small subunit ribosomal protein S5	5	6	12	6
K02990 - small subunit ribosomal protein S6	2	2	3	5
K02992 - small subunit ribosomal protein S7	2	2	11	5
K02994 - small subunit ribosomal protein S8	1	2	8	12
K02996 - small subunit ribosomal protein S9	3	2	10	5
K02946 - small subunit ribosomal protein S10	1	4	9	9
K02948 - small subunit ribosomal protein S11	1	2	4	9
K02950 - small subunit ribosomal protein S12	3	3	9	7
K02952 - small subunit ribosomal protein S13	2	2	9	7
K02954 - small subunit ribosomal protein S14	3	0	5	5
K02956 - small subunit ribosomal protein S15	5	3	0	9
K02959 - small subunit ribosomal protein S16	2	3	3	4
K02961 - small subunit ribosomal protein S17	2	6	4	0
K02963 - small subunit ribosomal protein S18	2	2	3	6
K02965 - small subunit ribosomal protein S19	6	3	7	10
K02968 - small subunit ribosomal protein S20	4	1	3	4
K02970 - small subunit ribosomal protein S21	5	1	2	1
K02984 - small subunit ribosomal protein S3Ae	0	0	2	0
K02987 - small subunit ribosomal protein S4e	0	0	2	0
K02995 - small subunit ribosomal protein S8e	0	1	0	0
K02962 - small subunit ribosomal protein S17e	0	1	0	0
K02966 - small subunit ribosomal protein S19e	1	0	2	0
K02978 - small subunit ribosomal protein S27e	0	0	0	1
K02977 - small subunit ribosomal protein S27Ae	1	0	0	1
K02863 - large subunit ribosomal protein L1	7	0	14	7
K02886 - large subunit ribosomal protein L2	4	4	9	17
K02906 - large subunit ribosomal protein L3	7	1	20	14
K02926 - large subunit ribosomal protein L4	9	4	7	16
K02931 - large subunit ribosomal protein L5	3	7	8	6
K02933 - large subunit ribosomal protein L6	2	7	5	9
K02935 - large subunit ribosomal protein L7/L12	3	3	9	6
K02939 - large subunit ribosomal protein L9	7	4	2	8
K02864 - large subunit ribosomal protein L10	5	3	12	10
K02867 - large subunit ribosomal protein L11	4	1	13	9
K02869 - large subunit ribosomal protein L12	0	0	1	0
K02871 - large subunit ribosomal protein L13	2	0	15	12
K02874 - large subunit ribosomal protein L14	1	4	5	6
K02876 - large subunit ribosomal protein L15	8	2	9	12
K02878 - large subunit ribosomal protein L16	6	4	6	8
K02879 - large subunit ribosomal protein L17	2	3	13	7
K02881 - large subunit ribosomal protein L18	0	1	7	5
K02884 - large subunit ribosomal protein L19	5	3	9	6
K02887 - large subunit ribosomal protein L20	8	5	9	10
K02888 - large subunit ribosomal protein L21	3	4	8	4
K02890 - large subunit ribosomal protein L22	2	2	5	3
K02892 - large subunit ribosomal protein L23	5	2	2	8
K02895 - large subunit ribosomal protein L24	6	2	6	6
K02897 - large subunit ribosomal protein L25	6	4	8	7
K02899 - large subunit ribosomal protein L27	2	2	6	5
K02902 - large subunit ribosomal protein L28	2	3	8	10
K02907 - large subunit ribosomal protein L30	1	0	2	3
K02909 - large subunit ribosomal protein L31	0	3	7	5
K02911 - large subunit ribosomal protein L32	1	1	2	3
K02913 - large subunit ribosomal protein L33	0	2	3	3
K02914 - large subunit ribosomal protein L34	2	4	3	0
K02916 - large subunit ribosomal protein L35	0	1	2	0
K02930 - large subunit ribosomal protein L4e	0	0	1	1
K02866 - large subunit ribosomal protein L10e	1	0	3	1
K02873 - large subunit ribosomal protein L13e	0	0	1	0
K02877 - large subunit ribosomal protein L15e	0	0	2	1
K02885 - large subunit ribosomal protein L19e	0	0	1	0
K02889 - large subunit ribosomal protein L21e	0	0	0	2
K02910 - large subunit ribosomal protein L31e	0	0	0	1
K02921 - large subunit ribosomal protein L37Ae	0	0	1	2
K02927 - large subunit ribosomal protein L40e	0	0	0	1
K09698 - nondiscriminating glutamyl-tRNA synthetase [EC:6.1.1.24]	1	0	0	1
K02433 - aspartyl-tRNA(Asn)/glutamyl-tRNA (Gln) amidotransferase subunit A [EC:6.3.5.6 6.3.5.7]	15	14	30	12
K02434 - aspartyl-tRNA(Asn)/glutamyl-tRNA (Gln) amidotransferase subunit B [EC:6.3.5.6 6.3.5.7]	4	1	27	14
K02435 - aspartyl-tRNA(Asn)/glutamyl-tRNA (Gln) amidotransferase subunit C [EC:6.3.5.6 6.3.5.7]	3	2	4	4
K09482 - glutamyl-tRNA(Gln) amidotransferase subunit D [EC:6.3.5.7]	0	2	5	1
K03330 - glutamyl-tRNA(Gln) amidotransferase subunit E [EC:6.3.5.7]	0	4	3	0
K01886 - glutaminyl-tRNA synthetase [EC:6.1.1.18]	4	9	17	10
K01872 - alanyl-tRNA synthetase [EC:6.1.1.7]	22	24	37	40
K01876 - aspartyl-tRNA synthetase [EC:6.1.1.12]	14	9	30	18
K09759 - nondiscriminating aspartyl-tRNA synthetase [EC:6.1.1.23]	0	1	0	4
K01893 - asparaginyl-tRNA synthetase [EC:6.1.1.22]	3	6	27	29
K01880 - glycyl-tRNA synthetase [EC:6.1.1.14]	6	4	19	6
K01878 - glycyl-tRNA synthetase alpha chain [EC:6.1.1.14]	3	4	6	11
K01879 - glycyl-tRNA synthetase beta chain [EC:6.1.1.14]	10	10	15	39
K01868 - threonyl-tRNA synthetase [EC:6.1.1.3]	14	12	27	27
K01875 - seryl-tRNA synthetase [EC:6.1.1.11]	15	8	25	14
K07587 - O-phosphoseryl-tRNA synthetase [EC:6.1.1.27]	0	1	0	1
K06868 - Sep-tRNA:Cys-tRNA synthetase [EC:2.5.1.73]	0	0	0	1
K01883 - cysteinyl-tRNA synthetase [EC:6.1.1.16]	10	9	24	22
K01884 - cysteinyl-tRNA synthetase, unknown class [EC:6.1.1.16]	0	1	0	0
K01873 - valyl-tRNA synthetase [EC:6.1.1.9]	21	16	38	39
K01869 - leucyl-tRNA synthetase [EC:6.1.1.4]	20	15	41	35
K01870 - isoleucyl-tRNA synthetase [EC:6.1.1.5]	12	14	51	52
K04567 - lysyl-tRNA synthetase, class II [EC:6.1.1.6]	7	11	21	17
K04566 - lysyl-tRNA synthetase, class I [EC:6.1.1.6]	0	2	4	3
K04568 - lysyl-tRNA synthetase, class II [EC:6.1.1.6]	2	2	1	0
K01887 - arginyl-tRNA synthetase [EC:6.1.1.19]	17	9	23	19
K01881 - prolyl-tRNA synthetase [EC:6.1.1.15]	10	14	32	39
K01892 - histidyl-tRNA synthetase [EC:6.1.1.21]	3	13	30	26
K01889 - phenylalanyl-tRNA synthetase alpha chain [EC:6.1.1.20]	9	10	18	18
K01890 - phenylalanyl-tRNA synthetase beta chain [EC:6.1.1.20]	14	13	40	28
K01866 - tyrosyl-tRNA synthetase [EC:6.1.1.1]	6	7	22	12
K01867 - tryptophanyl-tRNA synthetase [EC:6.1.1.2]	7	8	19	19
K03539 - ribonuclease P/MRP protein subunit RPP1 [EC:3.1.26.5]	0	0	1	0
K03540 - ribonuclease P protein subunit RPR2 [EC:3.1.26.5]	0	0	2	0
K00784 - ribonuclease Z [EC:3.1.26.11]	6	5	15	14
K00974 - tRNA nucleotidyltransferase (CCA-adding enzyme) [EC:2.7.7.72 3.1.3.- 3.1.4.-]	5	3	6	0
K03231 - elongation factor 1-alpha	0	0	4	7
K12172 - E3 SUMO-protein ligase RanBP2	1	0	0	0
K03236 - translation initiation factor 1A	0	0	0	2
K03113 - translation initiation factor 1	0	0	1	1
K03237 - translation initiation factor 2 subunit 1	0	0	2	1
K03238 - translation initiation factor 2 subunit 2	0	0	1	1
K03242 - translation initiation factor 2 subunit 3	0	0	4	1
K03680 - translation initiation factor eIF-2B subunit delta	0	0	0	1
K03243 - translation initiation factor 5B	0	6	4	5
K03265 - peptide chain release factor subunit 1	5	1	3	4
K04382 - protein phosphatase 2 (formerly 2A), catalytic subunit [EC:3.1.3.16]	0	0	1	0
K06965 - protein pelota	2	1	1	0
K03685 - ribonuclease III [EC:3.1.26.3]	4	4	10	8
K13288 - oligoribonuclease [EC:3.1.-.-]	0	0	1	2
K03264 - translation initiation factor 6	0	0	2	0
K07178 - RIO kinase 1 [EC:2.7.11.1]	0	0	3	0
K03076 - preprotein translocase subunit SecY	6	5	20	19
K03073 - preprotein translocase subunit SecE	3	1	3	2
K03075 - preprotein translocase subunit SecG	2	0	5	1
K03072 - preprotein translocase subunit SecD	11	11	16	19
K03074 - preprotein translocase subunit SecF	5	4	10	8
K12257 - SecD/SecF fusion protein	0	0	4	1
K03210 - preprotein translocase subunit YajC	0	0	4	2
K03217 - preprotein translocase subunit YidC	7	9	13	4
K03070 - preprotein translocase subunit SecA	23	19	45	53
K03071 - preprotein translocase subunit SecB	0	1	1	0
K03106 - signal recognition particle subunit SRP54	9	8	28	35
K03110 - fused signal recognition particle receptor	2	4	15	17
K07342 - protein transport protein SEC61 subunit gamma and related proteins	0	0	0	1
K09540 - translocation protein SEC63	1	0	0	0
K03105 - signal recognition particle subunit SRP19	0	0	2	1
K03116 - sec-independent protein translocase protein TatA	1	1	1	2
K03117 - sec-independent protein translocase protein TatB	0	2	1	1
K03118 - sec-independent protein translocase protein TatC	6	6	15	4
K03100 - signal peptidase I [EC:3.4.21.89]	2	13	15	18
K03101 - signal peptidase II [EC:3.4.23.36]	3	9	4	1
K13280 - signal peptidase, endoplasmic reticulum-type [EC:3.4.-.-]	1	0	0	0
K09523 - DnaJ homolog subfamily C member 3	0	0	1	0
K08288 - protein kinase C substrate 80K-H	0	0	1	0
K10088 - protein OS-9	0	1	0	0
K13525 - transitional endoplasmic reticulum ATPase	4	0	12	2
K04079 - molecular chaperone HtpG	1	4	4	2
K13993 - HSP20 family protein	6	8	18	20
K03350 - anaphase-promoting complex subunit 3	1	1	1	3
K03355 - anaphase-promoting complex subunit 8	1	0	0	0
K07236 - tRNA 2-thiouridine synthesizing protein C	0	1	1	0
K07235 - tRNA 2-thiouridine synthesizing protein D [EC:2.8.1.-]	0	1	0	0
K11179 - tRNA 2-thiouridine synthesizing protein E [EC:2.8.1.-]	0	2	1	3
K00566 - tRNA-specific 2-thiouridylase [EC:2.8.1.-]	8	6	19	21
K03831 - molybdopterin adenylyltransferase [EC:2.7.7.75]	2	0	2	0
K03154 - sulfur carrier protein	0	0	2	0
K13527 - proteasome-associated ATPase	2	0	12	1
K03420 - proteasome regulatory subunit	0	1	0	1
K02728 - 20S proteasome subunit alpha 3 [EC:3.4.25.1]	0	0	0	1
K03432 - proteasome alpha subunit [EC:3.4.25.1]	0	0	4	1
K03433 - proteasome beta subunit [EC:3.4.25.1]	2	0	7	0
K07573 - exosome complex component CSL4	0	0	2	0
K03679 - exosome complex component RRP4	0	0	3	1
K12589 - exosome complex component RRP42	0	0	1	2
K11600 - exosome complex component RRP41	0	0	1	0
K12600 - superkiller protein 3	0	0	1	0
K08311 - putative (di)nucleoside polyphosphate hydrolase [EC:3.6.1.-]	1	0	1	0
K08300 - ribonuclease E [EC:3.1.26.12]	2	5	7	2
K03732 - ATP-dependent RNA helicase RhlB [EC:3.6.4.13]	1	1	0	0
K11927 - ATP-dependent RNA helicase RhlE [EC:3.6.4.13]	0	3	1	2
K12573 - ribonuclease R [EC:3.1.-.-]	3	7	9	4
K05592 - ATP-dependent RNA helicase DeaD [EC:3.6.4.13]	2	4	2	4
K03654 - ATP-dependent DNA helicase RecQ [EC:3.6.4.12]	2	2	10	1
K03628 - transcription termination factor Rho	7	4	18	16
K12574 - ribonuclease J [EC:3.1.-.-]	7	3	6	11
K04043 - molecular chaperone DnaK	22	17	34	37
K04077 - chaperonin GroEL	13	16	33	24
K03666 - host factor-I protein	2	0	1	0
K00970 - poly(A) polymerase [EC:2.7.7.19]	8	13	15	33
K02314 - replicative DNA helicase [EC:3.6.4.12]	17	18	17	23
K02316 - DNA primase [EC:2.7.7.-]	9	9	17	14
K03111 - single-strand DNA-binding protein	3	3	8	11
K03469 - ribonuclease HI [EC:3.1.26.4]	6	4	11	10
K03470 - ribonuclease HII [EC:3.1.26.4]	6	2	8	10
K03471 - ribonuclease HIII [EC:3.1.26.4]	1	1	3	0
K01972 - DNA ligase (NAD+) [EC:6.5.1.2]	16	14	36	40
K07466 - replication factor A1	0	0	2	0
K04802 - proliferating cell nuclear antigen	0	0	4	2
K04799 - flap endonuclease-1 [EC:3.-.-.-]	0	0	6	3
K10747 - DNA ligase 1 [EC:6.5.1.1]	0	0	10	5
K10563 - formamidopyrimidine-DNA glycosylase [EC:3.2.2.23 4.2.99.18]	1	8	12	19
K05522 - endonuclease VIII [EC:3.2.2.- 4.2.99.18]	0	0	1	0
K03660 - N-glycosylase/DNA lyase [EC:3.2.2.- 4.2.99.18]	0	0	1	0
K10773 - endonuclease III [EC:4.2.99.18]	12	9	14	11
K01247 - DNA-3-methyladenine glycosylase II [EC:3.2.2.21]	2	1	0	1
K13529 - AraC family transcriptional regulator, regulatory protein of adaptative response / DNA-3-methyladenine glycosylase II [EC:3.2.2.21]	0	1	0	0
K01246 - DNA-3-methyladenine glycosylase I [EC:3.2.2.20]	0	3	0	0
K03648 - uracil-DNA glycosylase [EC:3.2.2.27]	0	2	0	3
K03649 - TDG/mug DNA glycosylase family protein [EC:3.2.2.-]	0	1	0	0
K03575 - A/G-specific adenine glycosylase [EC:3.2.2.-]	6	9	13	7
K03652 - DNA-3-methyladenine glycosylase [EC:3.2.2.21]	4	1	3	1
K01142 - exodeoxyribonuclease III [EC:3.1.11.2]	7	9	4	4
K01151 - deoxyribonuclease IV [EC:3.1.21.2]	6	0	11	16
K07462 - single-stranded-DNA-specific exonuclease [EC:3.1.-.-]	13	9	19	32
K01971 - DNA ligase (ATP) [EC:6.5.1.1]	2	3	3	3
K03723 - transcription-repair coupling factor (superfamily II helicase) [EC:3.6.4.-]	20	18	21	28
K03701 - excinuclease ABC subunit A	23	26	49	49
K03702 - excinuclease ABC subunit B	7	18	39	34
K03703 - excinuclease ABC subunit C	11	6	31	25
K03657 - DNA helicase II / ATP-dependent DNA helicase PcrA [EC:3.6.4.12]	24	35	40	39
K03555 - DNA mismatch repair protein MutS	16	8	44	38
K07456 - DNA mismatch repair protein MutS2	9	9	28	29
K03572 - DNA mismatch repair protein MutL	14	7	31	26
K01141 - exodeoxyribonuclease I [EC:3.1.11.1]	1	2	0	0
K03601 - exodeoxyribonuclease VII large subunit [EC:3.1.11.6]	9	4	16	10
K03602 - exodeoxyribonuclease VII small subunit [EC:3.1.11.6]	0	2	3	1
K06223 - DNA adenine methylase [EC:2.1.1.72]	2	6	4	5
K08737 - DNA mismatch repair protein MSH6	0	0	0	1
K08735 - DNA mismatch repair protein MSH2	0	0	1	0
K03629 - DNA replication and repair protein RecF	8	5	10	14
K03584 - DNA repair protein RecO (recombination protein O)	3	4	6	8
K06187 - recombination protein RecR	2	3	9	6
K03553 - recombination protein RecA	9	16	23	19
K03550 - holliday junction DNA helicase RuvA [EC:3.6.4.12]	4	4	7	12
K03551 - holliday junction DNA helicase RuvB [EC:3.6.4.12]	6	5	24	10
K01159 - crossover junction endodeoxyribonuclease RuvC [EC:3.1.22.4]	0	3	7	8
K03655 - ATP-dependent DNA helicase RecG [EC:3.6.4.12]	30	18	39	28
K03582 - exodeoxyribonuclease V beta subunit [EC:3.1.11.5]	1	2	1	1
K03583 - exodeoxyribonuclease V gamma subunit [EC:3.1.11.5]	1	1	0	0
K03581 - exodeoxyribonuclease V alpha subunit [EC:3.1.11.5]	1	9	1	2
K04066 - primosomal protein N' (replication factor Y) (superfamily II helicase) [EC:3.6.4.-]	9	8	25	26
K10979 - DNA end-binding protein Ku	1	0	0	0
K10896 - fanconi anemia group M protein	0	2	5	3
K02350 - DNA polymerase zeta subunit [EC:2.7.7.7]	0	1	1	0
K02048 - sulfate transport system substrate-binding protein	1	3	2	0
K02046 - sulfate transport system permease protein	0	1	0	0
K02047 - sulfate transport system permease protein	0	1	2	0
K02045 - sulfate transport system ATP-binding protein [EC:3.6.3.25]	1	0	2	1
K05772 - tungstate transport system substrate-binding protein	1	2	2	4
K05773 - tungstate transport system permease protein	7	2	2	1
K06857 - tungstate transport system ATP-binding protein	1	2	1	1
K02020 - molybdate transport system substrate-binding protein	2	5	5	1
K02018 - molybdate transport system permease protein	1	2	4	1
K02017 - molybdate transport system ATP-binding protein [EC:3.6.3.29]	1	1	0	3
K05776 - molybdate transport system ATP-binding protein	0	1	0	0
K02012 - iron(III) transport system substrate-binding protein	4	6	6	5
K02011 - iron(III) transport system permease protein	9	2	8	2
K02010 - iron(III) transport system ATP-binding protein [EC:3.6.3.30]	4	3	2	5
K02064 - thiamine transport system substrate-binding protein	2	3	4	6
K02063 - thiamine transport system permease protein	1	2	12	9
K02062 - thiamine transport system ATP-binding protein	0	1	1	0
K11069 - spermidine/putrescine transport system substrate-binding protein	2	3	1	5
K11070 - spermidine/putrescine transport system permease protein	2	0	0	2
K11071 - spermidine/putrescine transport system permease protein	1	4	1	1
K11072 - spermidine/putrescine transport system ATP-binding protein [EC:3.6.3.31]	3	5	4	3
K11074 - putrescine transport system permease protein	0	0	1	0
K11076 - putrescine transport system ATP-binding protein	0	1	3	0
K02002 - glycine betaine/proline transport system substrate-binding protein	0	1	0	0
K02001 - glycine betaine/proline transport system permease protein	0	1	0	0
K02000 - glycine betaine/proline transport system ATP-binding protein [EC:3.6.3.32]	0	0	0	1
K05845 - osmoprotectant transport system substrate-binding protein	0	0	1	0
K05846 - osmoprotectant transport system permease protein	0	1	2	0
K05847 - osmoprotectant transport system ATP-binding protein	1	0	3	1
K10108 - maltose/maltodextrin transport system substrate-binding protein	4	1	2	10
K10109 - maltose/maltodextrin transport system permease protein	2	4	5	10
K10110 - maltose/maltodextrin transport system permease protein	3	1	2	8
K10112 - maltose/maltodextrin transport system ATP-binding protein	5	6	11	8
K10115 - maltooligosaccharide transport system permease protein	0	0	0	2
K10118 - multiple sugar transport system permease protein	0	0	1	0
K05813 - sn-glycerol 3-phosphate transport system substrate-binding protein	4	4	14	18
K05814 - sn-glycerol 3-phosphate transport system permease protein	3	0	3	6
K05815 - sn-glycerol 3-phosphate transport system permease protein	2	1	2	5
K05816 - sn-glycerol 3-phosphate transport system ATP-binding protein [EC:3.6.3.20]	0	1	0	0
K10188 - lactose/L-arabinose transport system substrate-binding protein	1	4	1	1
K10189 - lactose/L-arabinose transport system permease protein	3	0	1	0
K10190 - lactose/L-arabinose transport system permease protein	1	1	0	1
K10232 - alpha-glucoside transport system substrate-binding protein	0	1	4	3
K10233 - alpha-glucoside transport system permease protein	1	4	2	6
K10234 - alpha-glucoside transport system permease protein	1	2	1	3
K10239 - trehalose/maltose transport system ATP-binding protein	0	1	0	0
K10243 - cellobiose transport system ATP-binding protein	0	0	0	1
K10546 - putative multiple sugar transport system substrate-binding protein	2	4	0	0
K10547 - putative multiple sugar transport system permease protein	2	0	0	2
K10548 - putative multiple sugar transport system ATP-binding protein	1	0	0	5
K10439 - ribose transport system substrate-binding protein	3	7	9	5
K10440 - ribose transport system permease protein	6	3	7	18
K10441 - ribose transport system ATP-binding protein [EC:3.6.3.17]	10	5	12	22
K06726 - D-ribose pyranase [EC:5.-.-.-]	0	0	0	1
K10539 - L-arabinose transport system ATP-binding protein [EC:3.6.3.17]	0	1	0	0
K10542 - methyl-galactoside transport system ATP-binding protein [EC:3.6.3.17]	0	0	0	1
K10543 - D-xylose transport system substrate-binding protein	0	1	0	0
K10545 - D-xylose transport system ATP-binding protein [EC:3.6.3.17]	1	0	0	0
K10552 - fructose transport system substrate-binding protein	0	1	0	0
K10553 - fructose transport system permease protein	0	0	1	0
K10554 - fructose transport system ATP-binding protein	0	1	0	0
K10556 - AI-2 transport system permease protein	0	0	0	1
K10559 - rhamnose transport system substrate-binding protein	2	1	0	0
K10560 - rhamnose transport system permease protein	0	1	0	0
K10562 - rhamnose transport system ATP-binding protein [EC:3.6.3.17]	0	1	1	0
K02040 - phosphate transport system substrate-binding protein	12	12	22	32
K02037 - phosphate transport system permease protein	3	6	19	25
K02038 - phosphate transport system permease protein	5	12	12	22
K02036 - phosphate transport system ATP-binding protein [EC:3.6.3.27]	5	16	33	28
K02044 - phosphonate transport system substrate-binding protein	2	3	11	4
K02042 - phosphonate transport system permease protein	1	3	8	4
K02041 - phosphonate transport system ATP-binding protein [EC:3.6.3.28]	4	5	5	3
K05781 - putative phosphonate transport system ATP-binding protein	0	0	2	0
K10013 - lysine/arginine/ornithine transport system substrate-binding protein	0	0	1	0
K10017 - histidine transport system ATP-binding protein [EC:3.6.3.21]	0	0	1	0
K10014 - histidine transport system substrate-binding protein	1	0	1	0
K10038 - glutamine transport system ATP-binding protein [EC:3.6.3.-]	0	0	1	0
K10039 - putative glutamine transport system substrate-binding protein	0	0	1	2
K10040 - putative glutamine transport system permease protein	0	1	0	0
K10041 - putative glutamine transport system ATP-binding protein [EC:3.6.3.-]	0	0	1	0
K10001 - glutamate/aspartate transport system substrate-binding protein	0	1	0	0
K10002 - glutamate/aspartate transport system permease protein	1	1	0	0
K10003 - glutamate/aspartate transport system permease protein	2	0	0	0
K10004 - glutamate/aspartate transport system ATP-binding protein [EC:3.6.3.-]	1	0	0	0
K09969 - general L-amino acid transport system substrate-binding protein	2	0	2	1
K09970 - general L-amino acid transport system permease protein	0	0	1	0
K09971 - general L-amino acid transport system permease protein	1	0	1	1
K09972 - general L-amino acid transport system ATP-binding protein [EC:3.6.3.-]	1	1	4	1
K10009 - cystine transport system permease protein	1	0	6	0
K10010 - cystine transport system ATP-binding protein [EC:3.6.3.-]	0	1	2	0
K01999 - branched-chain amino acid transport system substrate-binding protein	29	20	66	73
K01997 - branched-chain amino acid transport system permease protein	15	17	49	54
K01998 - branched-chain amino acid transport system permease protein	18	10	34	34
K01995 - branched-chain amino acid transport system ATP-binding protein	15	18	43	37
K01996 - branched-chain amino acid transport system ATP-binding protein	15	18	35	25
K11956 - neutral amino acid transport system permease protein	0	0	2	0
K11957 - neutral amino acid transport system ATP-binding protein	0	0	1	0
K11958 - neutral amino acid transport system ATP-binding protein	0	0	8	0
K11959 - urea transport system substrate-binding protein	0	1	0	0
K11960 - urea transport system permease protein	0	1	1	0
K11961 - urea transport system permease protein	0	1	0	0
K02071 - D-methionine transport system ATP-binding protein	0	0	1	1
K12368 - dipeptide transport system substrate-binding protein	1	1	2	0
K13889 - glutathione transport system substrate-binding protein	0	0	0	3
K13890 - glutathione transport system permease protein	0	0	1	0
K13891 - glutathione transport system permease protein	1	1	0	1
K13893 - microcin C transport system substrate-binding protein	1	0	3	0
K13894 - microcin C transport system permease protein	0	1	0	0
K13896 - microcin C transport system ATP-binding protein	0	0	1	1
K02016 - iron complex transport system substrate-binding protein	16	7	23	23
K02015 - iron complex transport system permease protein	6	2	12	11
K02013 - iron complex transport system ATP-binding protein [EC:3.6.3.34]	8	8	21	17
K06858 - vitamin B12 transport system substrate-binding protein	0	1	0	0
K06074 - vitamin B12 transport system ATP-binding protein [EC:3.6.3.33]	0	0	0	1
K09815 - zinc transport system substrate-binding protein	2	3	8	5
K09816 - zinc transport system permease protein	0	3	5	2
K09817 - zinc transport system ATP-binding protein [EC:3.6.3.-]	6	1	11	6
K11707 - manganese/zinc/iron transport system substrate-binding protein	0	0	2	4
K11708 - manganese/zinc/iron transport system permease protein	0	1	0	2
K11709 - manganese/zinc/iron transport system permease protein	0	2	0	0
K11710 - manganese/zinc/iron transport system ATP- binding protein	1	0	0	1
K02007 - cobalt/nickel transport system permease protein	2	2	8	11
K02008 - cobalt/nickel transport system permease protein	5	4	9	19
K02006 - cobalt/nickel transport system ATP-binding protein	15	12	24	52
K10094 - nickel transport system substrate-binding protein	0	0	2	0
K09686 - antibiotic transport system permease protein	17	12	33	45
K09687 - antibiotic transport system ATP-binding protein	13	20	37	53
K09688 - capsular polysaccharide transport system permease protein	0	0	0	1
K09689 - capsular polysaccharide transport system ATP-binding protein	0	0	0	3
K09690 - lipopolysaccharide transport system permease protein	2	6	14	8
K09691 - lipopolysaccharide transport system ATP-binding protein	3	6	12	18
K09694 - lipooligosaccharide transport system permease protein	0	0	5	1
K09695 - lipooligosaccharide transport system ATP-binding protein	0	2	3	0
K09696 - sodium transport system permease protein	3	2	0	0
K09697 - sodium transport system ATP-binding protein	1	0	3	1
K09808 - lipoprotein-releasing system permease protein	7	12	9	13
K09810 - lipoprotein-releasing system ATP-binding protein [EC:3.6.3.-]	6	6	18	17
K02196 - heme exporter protein D	0	0	1	0
K02195 - heme exporter protein C	1	3	0	4
K02194 - heme exporter protein B	5	3	3	3
K02193 - heme exporter protein A [EC:3.6.3.41]	2	2	0	2
K09811 - cell division transport system permease protein	3	2	1	1
K09812 - cell division transport system ATP-binding protein	4	1	8	8
K07091 - lipopolysaccharide export system permease protein	2	3	2	0
K11720 - lipopolysaccharide export system permease protein	1	1	3	1
K06861 - lipopolysaccharide export system ATP-binding protein [EC:3.6.3.-]	3	2	10	8
K05655 - ATP-binding cassette, subfamily B (MDR/TAP), member 8	0	1	0	0
K11085 - ATP-binding cassette, subfamily B, bacterial MsbA [EC:3.6.3.-]	11	9	10	20
K06148 - ATP-binding cassette, subfamily C, bacterial	5	6	4	5
K05677 - ATP-binding cassette, subfamily D (ALD), member 3	1	0	0	0
K05685 - macrolide transport system ATP-binding/permease protein [EC:3.6.3.-]	0	0	2	0
K02471 - putative ATP-binding cassette transporter	2	4	1	0
K08483 - phosphotransferase system, enzyme I, PtsI [EC:2.7.3.9]	1	7	6	19
K02784 - phosphocarrier protein HPr	0	0	2	1
K11183 - phosphocarrier protein FPr	1	2	3	6
K08484 - phosphotransferase system, enzyme I, PtsP [EC:2.7.3.9]	1	1	4	1
K02806 - PTS system, nitrogen regulatory IIA component [EC:2.7.1.69]	4	3	0	6
K12340 - outer membrane channel protein	7	6	1	4
K03221 - type III secretion protein SctF	1	0	0	0
K03226 - type III secretion protein SctR	2	0	0	0
K03230 - type III secretion protein SctV	1	0	0	0
K02453 - general secretion pathway protein D	9	3	7	3
K02452 - general secretion pathway protein C	0	1	0	0
K02455 - general secretion pathway protein F	0	3	3	1
K02456 - general secretion pathway protein G	2	0	5	0
K02457 - general secretion pathway protein H	1	0	0	0
K02458 - general secretion pathway protein I	0	0	0	1
K02459 - general secretion pathway protein J	0	2	0	1
K02460 - general secretion pathway protein K	0	3	1	0
K02461 - general secretion pathway protein L	0	1	1	1
K02462 - general secretion pathway protein M	0	1	0	0
K02454 - general secretion pathway protein E	8	5	8	6
K03204 - type IV secretion system protein VirB9	0	1	0	0
K03195 - type IV secretion system protein VirB10	1	0	0	0
K03205 - type IV secretion system protein VirD4	0	1	0	0
K11904 - type VI secretion system secreted protein VgrG	1	1	0	0
K11903 - type VI secretion system secreted protein Hcp	0	0	2	0
K11891 - type VI secretion system protein ImpL	2	2	4	0
K11892 - type VI secretion system protein ImpK	0	1	0	0
K11907 - type VI secretion system protein VasG	1	0	1	0
K11912 - serine/threonine-protein kinase PpkA [EC:2.7.11.1]	0	1	0	0
K07636 - two-component system, OmpR family, phosphate regulon sensor histidine kinase PhoR [EC:2.7.13.3]	23	10	32	54
K07657 - two-component system, OmpR family, phosphate regulon response regulator PhoB	5	2	5	12
K07658 - two-component system, OmpR family, alkaline phosphatase synthesis response regulator PhoP	2	6	13	29
K07776 - two-component system, OmpR family, response regulator RegX3	0	1	6	4
K07637 - two-component system, OmpR family, sensor histidine kinase PhoQ [EC:2.7.13.3]	0	1	0	0
K07638 - two-component system, OmpR family, osmolarity sensor histidine kinase EnvZ [EC:2.7.13.3]	2	0	2	0
K07659 - two-component system, OmpR family, phosphate regulon response regulator OmpR	0	0	2	0
K07662 - two-component system, OmpR family, response regulator CpxR	0	0	1	0
K04771 - serine protease Do [EC:3.4.21.107]	0	2	1	1
K07641 - two-component system, OmpR family, sensor histidine kinase CreC [EC:2.7.13.3]	0	1	0	0
K07642 - two-component system, OmpR family, sensor histidine kinase BaeS [EC:2.7.13.3]	1	2	6	8
K07664 - two-component system, OmpR family, response regulator BaeR	0	1	0	1
K07799 - putative multidrug efflux transporter MdtA	0	1	2	6
K07789 - RND superfamily, multidrug transport protein MdtC	0	0	1	0
K07644 - two-component system, OmpR family, heavy metal sensor histidine kinase CusS [EC:2.7.13.3]	1	0	0	0
K07665 - two-component system, OmpR family, copper resistance phosphate regulon response regulator CusR	4	3	5	2
K07796 - Cu(I)/Ag(I) efflux system outer membrane protein CusC/SilC	1	2	0	0
K07798 - Cu(I)/Ag(I) efflux system membrane protein CusB/SilB	9	4	6	3
K07787 - Cu(I)/Ag(I) efflux system membrane protein CusA/SilA	10	6	11	10
K07645 - two-component system, OmpR family, sensor histidine kinase QseC [EC:2.7.13.3]	1	2	0	0
K07666 - two-component system, OmpR family, response regulator QseB	1	0	0	0
K02403 - flagellar transcriptional activator FlhD	1	0	0	0
K02402 - flagellar transcriptional activator FlhC	1	1	0	0
K02406 - flagellin	15	5	8	8
K02405 - RNA polymerase sigma factor for flagellar operon FliA	5	4	3	3
K02556 - chemotaxis protein MotA	2	6	8	5
K07646 - two-component system, OmpR family, sensor histidine kinase KdpD [EC:2.7.13.3]	3	4	3	2
K07667 - two-component system, OmpR family, KDP operon response regulator KdpE	7	6	5	9
K01546 - K+-transporting ATPase ATPase A chain [EC:3.6.3.12]	1	4	0	0
K01547 - K+-transporting ATPase ATPase B chain [EC:3.6.3.12]	0	2	0	0
K01548 - K+-transporting ATPase ATPase C chain [EC:3.6.3.12]	0	2	0	0
K03533 - TorA specific chaperone	1	0	0	0
K07649 - two-component system, OmpR family, sensor histidine kinase TctE [EC:2.7.13.3]	0	0	1	0
K07793 - putative tricarboxylic transport membrane protein	3	5	6	6
K07794 - putative tricarboxylic transport membrane protein	0	1	0	0
K07795 - putative tricarboxylic transport membrane protein	1	1	0	0
K07651 - two-component system, OmpR family, sensor histidine kinase ResE [EC:2.7.13.3]	0	3	4	7
K07775 - two-component system, OmpR family, response regulator ResD	0	2	1	3
K07652 - two-component system, OmpR family, sensor histidine kinase VicK [EC:2.7.13.3]	5	8	13	30
K07668 - two-component system, OmpR family, response regulator VicR	5	4	8	6
K07653 - two-component system, OmpR family, sensor histidine kinase MprB [EC:2.7.13.3]	1	1	0	0
K07669 - two-component system, OmpR family, response regulator MprA	1	2	3	1
K07654 - two-component system, OmpR family, sensor histidine kinase MtrB [EC:2.7.13.3]	0	0	1	0
K07670 - two-component system, OmpR family, response regulator MtrA	1	0	4	5
K02313 - chromosomal replication initiator protein	9	9	25	15
K11520 - two-component system, OmpR family, manganese sensing sensor histidine kinase [EC:2.7.13.3]	0	1	0	0
K08479 - two-component system, OmpR family, clock-associated histidine kinase SasA [EC:2.7.13.3]	0	2	3	4
K10697 - two-component system, OmpR family, response regulator RpaA	0	1	0	2
K13532 - two-component system, sporulation sensor kinase D [EC:2.7.13.3]	0	0	0	1
K13533 - two-component system, sporulation sensor kinase E [EC:2.7.13.3]	0	1	1	1
K02490 - two-component system, response regulator, stage 0 sporulation protein F	0	0	2	4
K01910 - [citrate (pro-3S)-lyase] ligase [EC:6.2.1.22]	0	1	0	0
K05966 - triphosphoribosyl-dephospho-CoA synthase [EC:2.7.8.25]	0	0	0	1
K07704 - two-component system, LytT family, sensor histidine kinase LytS [EC:2.7.13.3]	2	2	1	3
K07705 - two-component system, LytT family, response regulator LytT	0	0	0	1
K08082 - two-component system, LytT family, sensor histidine kinase AlgZ [EC:2.7.13.3]	0	0	1	0
K07673 - two-component system, NarL family, nitrate/nitrite sensor histidine kinase NarX [EC:2.7.13.3]	1	4	5	7
K07684 - two-component system, NarL family, nitrate/nitrite response regulator NarL	2	3	7	5
K07674 - two-component system, NarL family, nitrate/nitrite sensor histidine kinase NarQ [EC:2.7.13.3]	0	0	1	0
K07675 - two-component system, NarL family, sensor histidine kinase UhpB [EC:2.7.13.3]	1	3	3	1
K07677 - two-component system, NarL family, capsular synthesis sensor histidine kinase RcsC [EC:2.7.13.3]	0	0	2	1
K07687 - two-component system, NarL family, captular synthesis response regulator RcsB	0	1	0	0
K07678 - two-component system, NarL family, sensor histidine kinase BarA [EC:2.7.13.3]	1	0	3	0
K07689 - two-component system, NarL family, invasion response regulator UvrY	0	1	0	0
K07782 - LuxR family transcriptional regulator	0	1	0	0
K03563 - carbon storage regulator	1	0	0	1
K07679 - two-component system, NarL family, sensor histidine kinase EvgS [EC:2.7.13.3]	0	0	2	0
K07777 - two-component system, NarL family, sensor histidine kinase DegS [EC:2.7.13.3]	2	7	3	23
K07692 - two-component system, NarL family, response regulator DegU	2	1	1	2
K07778 - two-component system, NarL family, sensor histidine kinase DesK [EC:2.7.13.3]	1	0	1	0
K07693 - two-component system, NarL family, response regulator DesR	0	0	0	1
K07694 - two-component system, NarL family, vancomycin resistance associated response regulator VraR	1	0	0	0
K11617 - two-component system, NarL family, sensor histidine kinase LiaS [EC:2.7.13.3]	0	2	0	1
K11618 - two-component system, NarL family, response regulator LiaR	0	2	1	5
K11621 - lia operon protein LiaG	0	0	0	1
K07682 - two-component system, NarL family, sensor histidine kinase DevS [EC:2.7.13.3]	2	0	0	0
K07695 - two-component system, NarL family, response regulator DevR	0	1	0	0
K07683 - two-component system, NarL family, sensor histidine kinase NreB [EC:2.7.13.3]	1	0	0	1
K07696 - two-component system, NarL family, response regulator NreC	2	1	2	1
K00990 - [protein-PII] uridylyltransferase [EC:2.7.7.59]	5	2	6	0
K04751 - nitrogen regulatory protein P-II 1	1	4	2	3
K07708 - two-component system, NtrC family, nitrogen regulation sensor histidine kinase GlnL [EC:2.7.13.3]	1	1	5	0
K07712 - two-component system, NtrC family, nitrogen regulation response regulator GlnG	3	6	5	5
K13598 - two-component system, NtrC family, nitrogen regulation sensor histidine kinase NtrY [EC:2.7.13.3]	3	5	2	2
K13599 - two-component system, NtrC family, nitrogen regulation response regulator NtrX	1	3	5	3
K02584 - Nif-specific regulatory protein	10	13	14	21
K07709 - two-component system, NtrC family, sensor histidine kinase HydH [EC:2.7.13.3]	3	2	5	0
K07713 - two-component system, NtrC family, response regulator HydG	4	5	7	5
K07710 - two-component system, NtrC family, sensor histidine kinase AtoS [EC:2.7.13.3]	0	3	2	2
K07714 - two-component system, NtrC family, response regulator AtoC	9	5	9	3
K02106 - short-chain fatty acids transporter	0	1	1	0
K10125 - two-component system, NtrC family, C4-dicarboxylate transport sensor histidine kinase DctB [EC:2.7.13.3]	2	0	0	1
K10126 - two-component system, NtrC family, C4-dicarboxylate transport response regulator DctD	0	1	1	1
K02668 - two-component system, NtrC family, sensor histidine kinase PilS [EC:2.7.13.3]	5	4	2	1
K02667 - two-component system, NtrC family, response regulator PilR	3	3	6	9
K03092 - RNA polymerase sigma-54 factor	5	4	8	7
K02650 - type IV pilus assembly protein PilA	2	0	0	1
K11383 - two-component system, NtrC family, sensor histidine kinase KinB [EC:2.7.13.3]	0	1	0	1
K07711 - two-component system, NtrC family, sensor histidine kinase GlrK [EC:2.7.13.3]	0	0	0	2
K07715 - two-component system, NtrC family, response regulator GlrR	0	1	4	0
K00575 - chemotaxis protein methyltransferase CheR [EC:2.1.1.80]	6	3	4	10
K13924 - two-component system, chemotaxis family, CheB/CheR fusion protein [EC:2.1.1.80 3.1.1.61]	3	7	4	6
K03406 - methyl-accepting chemotaxis protein	24	23	18	57
K05874 - methyl-accepting chemotaxis protein I, serine sensor receptor	0	0	1	0
K03776 - aerotaxis receptor	1	0	0	0
K03408 - purine-binding chemotaxis protein CheW	7	6	2	2
[truncated: 1,817 more rows]
